# Supplementary material for: Copper-catalyzed C2 alkenylation of pyridine-N-oxides with alkynes
Source: Royal Society of Chemistry journal article supplement (doi:10.1039/d2cc00851c), 2022-01-01

## Electronic Supporting Information

### Copper-catalyzed C2 alkenylation of pyridine-*N*-oxides with alkynes

Shuxia Wang,<sup>‡a</sup> Lei Sun,<sup>‡a</sup> Minghui Gao,<sup>a</sup> Qin Jiang,<sup>a</sup> Weiming Hu,<sup>a</sup> Yaya Liu<sup>\*b</sup> and Chuanzhou Tao<sup>\*a,b</sup>

<sup>a</sup> School of Environmental and Chemical Engineering, Jiangsu Ocean University, Lianyungang 222005, P. R. of China.

<sup>b</sup> Jiangsu Key Laboratory of Function Control Technology for Advanced Materials, Jiangsu Ocean University, Lianyungang 222005, China

## Contents

|                                                                                |    |
|--------------------------------------------------------------------------------|----|
| <b>1. General information</b> .....                                            | 2  |
| <b>2. General procedure for alkenylation of pyridine-<i>N</i>-oxides</b> ..... | 2  |
| <b>3. Characterization data</b> .....                                          | 3  |
| 3.1 Characterization of the catalysts.....                                     | 3  |
| 3.2 Characterization of the aryl acetylenes.....                               | 4  |
| 3.3 Characterization of the 2-alkenylpyridines .....                           | 5  |
| <b>4. Further functionalization reactions</b> .....                            | 13 |
| <b>5. References</b> .....                                                     | 14 |

## 1. General information

Unless otherwise noted, all reactions were performed under an argon atmosphere (purity  $\geq$  99.999%) using standard Schlenk-type tubes on a dual-manifold Schlenk line. Various reagents were purchased from commercial sources and used without further purification. All the solvents were refluxed with  $\text{CaH}_2$  for 12 h, then distilled, further degassed by bubbling with argon for 20 min at room temperature, and stored with activated 4 Å molecular sieves. Isolated yields were determined after purification of the crude product by column chromatography with 10 ~ 40  $\mu\text{m}$  silica gel. Literature methods<sup>[1]</sup> were used to synthesize  $\text{IMesCuCl}$ ,  $\text{SIMesCuCl}$ ,  $\text{IPrCuCl}$ ,  $\text{SIPrCuCl}$  and  $\text{ICyCuCl}$ .

$^1\text{H}$  NMR and  $^{13}\text{C}$  NMR spectra were recorded on Bruker Advance III HD 500 spectrometer with complete proton decoupling. All NMR data were obtained in  $\text{CDCl}_3$  at ambient temperature. High-resolution mass spectrometric (HRMS) were recorded on a solarix-70FT-MS. X-ray crystallographic analysis was carried out by Bruker APEII CCD.

## 2. General procedure for alkenylation of pyridine-*N*-oxides

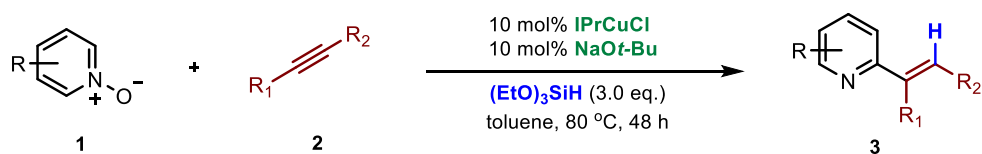

To an oven-dried Schlenk tube were added  $\text{IPrCuCl}$  (24.4 mg, 0.05 mmol),  $\text{NaOt-Bu}$  (4.8 mg, 0.05 mmol) and alkyne **2** (1.0 mmol, if the alkyne is solid). The tube was evacuated and backfilled with argon for three times. Under argon atmosphere, 0.5 mL toluene was syringed into the reaction tube by a disposable syringe. The reaction mixture was stirred at room temperature for 30 minutes, and then used a microliter syringe to add triethoxysilane (1.5 mmol) into the reaction tube. After stirring for 10 minutes, pyridine-*N*-oxide **1** (0.5 mmol) and toluene (0.5 mL) was syringed into the tube by a microliter syringe. The resultant mixture was stirred at 80 °C for 48 hours. After cooling to room temperature, an ethanol solution of sodium hydroxide was added into the system to quench the reaction. The combined organic layers were concentrated in vacuo and purified by chromatography on silica gel using ethyl acetate/petroleum ether as the eluent to give products **3**.

### 3. Characterization data

#### 3.1 Characterization of the catalysts

[1,3-Bis[2,6-diisopropylphenyl]imidazol-2-ylidene]copper(I) chloride (IPrCuCl) <sup>[1]</sup>:

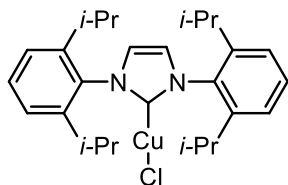

<sup>1</sup>H NMR (500 MHz, CDCl<sub>3</sub>) δ 7.49 (t, *J* = 7.8 Hz, 2H), 7.31 – 7.29 (m, 4H), 7.13 (s, 2H), 2.60 – 2.53 (m, 4H), 1.30 (d, *J* = 6.9 Hz, 12H), 1.23 (d, *J* = 6.9 Hz, 12H).

[1,3-Bis[2,6-(diisopropylphenyl)]imidazolidin-2-ylidene]copper(I) chloride (SIPrCuCl) <sup>[1]</sup>:

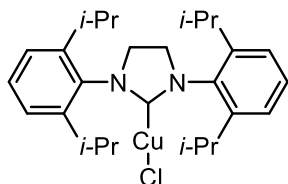

<sup>1</sup>H NMR (500 MHz, CDCl<sub>3</sub>) δ 7.40 (t, *J* = 7.8 Hz, 2H), 7.29 – 7.20 (m, 4H), 4.02 (s, 4H), 3.07 (dt, *J* = 13.8, 6.9 Hz, 4H), 1.38 – 1.34 (m, 24H).

[1,3-Bis(mesitylimidazol-2-ylidene)]copper(I) chloride (IMesCuCl) <sup>[1]</sup>:

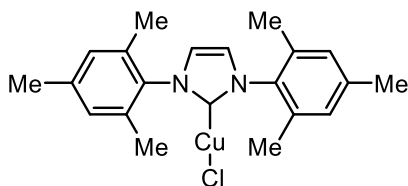

<sup>1</sup>H NMR (500 MHz, CDCl<sub>3</sub>) δ 7.05 (s, 2H), 7.00 (s, 4H), 2.35 (s, 6H), 2.11 (s, 12H).

[1,3-Bis(2,4,6-trimethylphenyl)imidazolidin-2-ylidene]copper(I) chloride (SIMesCuCl) <sup>[1]</sup>:

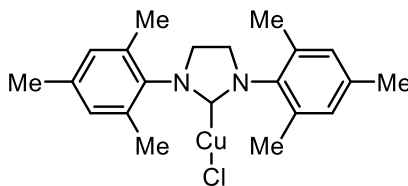

<sup>1</sup>H NMR (500 MHz, CDCl<sub>3</sub>) δ 6.95 (s, 4H), 3.95 (s, 4H), 2.31 – 2.30 (m, 18H).

**[1,3-dicyclohexylimidazol-2-ylidene]copper(I) chloride (ICyCuCl) <sup>[1]</sup>:**

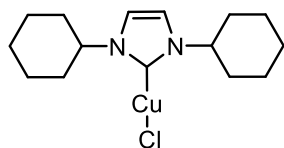

<sup>1</sup>H NMR (500 MHz, CDCl<sub>3</sub>) δ 6.93 (s, 2H), 4.30 (tt, *J* = 12.0, 3.6 Hz, 2H), 2.08 (d, *J* = 11.7 Hz, 4H), 1.89 (d, *J* = 13.7 Hz, 4H), 1.76 (d, *J* = 13.2 Hz, 2H), 1.65 (qd, *J* = 12.5, 3.2 Hz, 4H), 1.50 – 1.41 (m, 4H), 1.23 (ddd, *J* = 13.0, 10.1, 3.4 Hz, 2H).

**3.2 Characterization of the aryl acetylenes**

**1,2-di-*p*-tolylethyne (2b) <sup>[2]</sup>:**

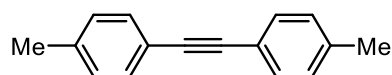

<sup>1</sup>H NMR (500 MHz, CDCl<sub>3</sub>) δ 7.42 (d, *J* = 8.1 Hz, 4H), 7.15 (d, *J* = 7.9 Hz, 4H), 2.37 (s, 6H).

**1,2-bis(4-chlorophenyl)ethyne (2c) <sup>[2]</sup>:**

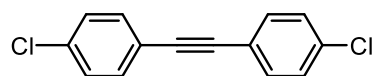

<sup>1</sup>H NMR (500 MHz, CDCl<sub>3</sub>) δ 7.52 – 7.41 (m, 4H), 7.36 – 7.30 (m, 4H).

**1,2-bis(4-bromophenyl)ethyne (2d) <sup>[2]</sup>:**

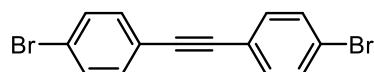

<sup>1</sup>H NMR (500 MHz, CDCl<sub>3</sub>) δ 7.49 (d, *J* = 8.3 Hz, 4H), 7.38 (d, *J* = 8.3 Hz, 4H).

**1,2-di(thiophen-2-yl)ethyne (2e) <sup>[2]</sup>:**

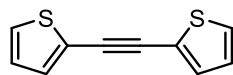

<sup>1</sup>H NMR (500 MHz, CDCl<sub>3</sub>) δ 7.31 (d, *J* = 5.1 Hz, 2H), 7.29 (d, *J* = 3.6 Hz, 2H), 7.02 (dd, *J* = 5.1, 3.7 Hz, 2H).

### 3.3 Characterization of the 2-alkenylpyridines

#### (*E*)-2-(1,2-diphenylvinyl)-6-methylpyridine (3aa):

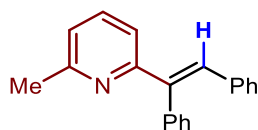

<sup>1</sup>H NMR (500 MHz, CDCl<sub>3</sub>) δ 7.89 (s, 1H), 7.43 – 7.34 (m, 4H), 7.27 – 7.23 (m, 2H), 7.13 – 7.09 (m, 3H), 7.07 – 7.04 (m, 2H), 7.02 (d, *J* = 7.6 Hz, 1H), 6.70 (d, *J* = 7.8 Hz, 1H), 2.64 (s, 3H). <sup>13</sup>C NMR (126 MHz, CDCl<sub>3</sub>) δ 158.04, 157.87, 140.55, 139.38, 136.94, 136.41, 130.62, 130.28, 130.01, 128.90, 127.80, 127.46, 127.04, 121.61, 119.62, 24.82. HRMS (ESI): *m/z* [M + H]<sup>+</sup> calcd for C<sub>20</sub>H<sub>18</sub>N:272.1439, found 272.1435.

#### (*E*)-2-(1,2-diphenylvinyl)-6-phenylpyridine (3ba):

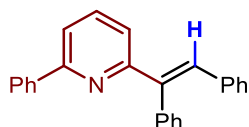

<sup>1</sup>H NMR (500 MHz, CDCl<sub>3</sub>) δ 8.19 – 8.14 (m, 3H), 7.63 (d, *J* = 5.0 Hz, 1H), 7.52 (d, *J* = 7.7 Hz, 2H), 7.44 (dt, *J* = 17.7, 8.7 Hz, 4H), 7.15 (t, *J* = 6.1 Hz, 3H), 7.13 – 7.11 (m, 4H), 7.10 (s, 1H), 6.89 (d, *J* = 7.4 Hz, 1H). <sup>13</sup>C NMR (126 MHz, CDCl<sub>3</sub>) δ 158.11, 156.31, 140.45, 139.53, 139.29, 130.95, 130.31, 130.07, 128.98, 128.68, 127.89, 127.52, 127.17, 127.10, 120.79, 118.58. HRMS (ESI): *m/z* [M + H]<sup>+</sup> calcd for C<sub>25</sub>H<sub>20</sub>N :334.1596, found 334.1605.

#### (*E*)-2-(1,2-diphenylvinyl)-5-methylpyridine (3ca):

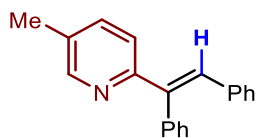

<sup>1</sup>H NMR (500 MHz, CDCl<sub>3</sub>) δ 8.49 (dd, *J* = 4.7, 1.0 Hz, 1H), 7.48 (dd, *J* = 7.6, 0.8 Hz, 1H), 7.24 – 7.19 (m, 5H), 7.19 – 7.16 (m, 5H), 7.15 – 7.13 (m, 1H), 6.80 (s, 1H), 2.14 (s, 3H). <sup>13</sup>C NMR (126 MHz, CDCl<sub>3</sub>) δ 160.85, 146.81, 141.77, 139.09, 138.65, 136.98, 131.96, 131.81, 129.85, 129.71, 128.47, 128.08, 127.47, 127.23, 122.40, 19.81. HRMS (ESI): *m/z* [M + H]<sup>+</sup> calcd for C<sub>20</sub>H<sub>18</sub>N:272.1439, found 272.1442.

**(E)-2-(1,2-diphenylvinyl)-4-methylpyridine (3da):**

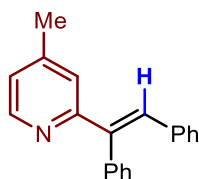

**<sup>1</sup>H NMR** (500 MHz, CDCl<sub>3</sub>) δ 8.52 (d, *J* = 4.9 Hz, 1H), 7.81 (s, 1H), 7.43 – 7.37 (m, 3H), 7.25 (dt, *J* = 4.0, 2.2 Hz, 2H), 7.14 – 7.09 (m, 3H), 7.06 – 7.02 (m, 2H), 6.98 (d, *J* = 4.8 Hz, 1H), 6.79 (s, 1H), 2.23 (s, 3H). **<sup>13</sup>C NMR** (126 MHz, CDCl<sub>3</sub>) δ 158.81, 149.03, 147.38, 140.61, 139.29, 136.87, 130.87, 130.28, 130.01, 129.01, 127.91, 127.59, 127.18, 123.39, 123.01, 21.14. **HRMS** (ESI): *m/z* [M + H]<sup>+</sup> calcd for C<sub>20</sub>H<sub>18</sub>N: 272.1434, found 272.1431.

**(E)-2-(1,2-diphenylvinyl)-4,6-dimethylpyridine (3ea):**

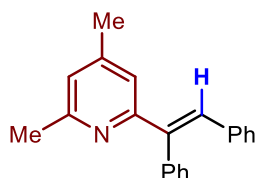

**<sup>1</sup>H NMR** (500 MHz, CDCl<sub>3</sub>) δ 7.86 (s, 1H), 7.38 (q, *J* = 6.9 Hz, 3H), 7.26 – 7.23 (m, 2H), 7.11 – 7.08 (m, 3H), 7.05 – 7.01 (m, 2H), 6.86 (s, 1H), 6.53 (s, 1H), 2.59 (s, 3H), 2.16 (s, 3H). **<sup>13</sup>C NMR** (126 MHz, CDCl<sub>3</sub>) δ 158.00, 157.64, 147.32, 140.67, 139.44, 137.02, 130.60, 130.30, 129.98, 128.85, 127.75, 127.40, 126.92, 122.63, 120.66, 24.62, 20.92. **HRMS** (ESI): *m/z* [M + H]<sup>+</sup> calcd for C<sub>21</sub>H<sub>20</sub>N: 286.1596, found 286.1606.

**(E)-6-(1,2-diphenylvinyl)-2,3-dimethylpyridine (3fa):**

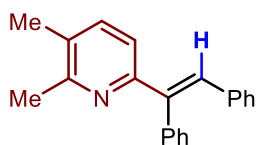

**<sup>1</sup>H NMR** (500 MHz, CDCl<sub>3</sub>) δ 7.86 (s, 1H), 7.36 (ddt, *J* = 9.0, 5.3, 3.5 Hz, 3H), 7.26 – 7.20 (m, 3H), 7.09 (dd, *J* = 6.0, 3.9 Hz, 3H), 7.06 – 7.03 (m, 2H), 6.64 (d, *J* = 7.8 Hz, 1H), 2.58 (s, 3H), 2.26 (s, 3H). **<sup>13</sup>C NMR** (126 MHz, CDCl<sub>3</sub>) δ 156.54, 155.53, 140.52, 139.49, 137.18, 137.08, 130.26, 129.90, 129.88, 129.61, 128.81, 127.74, 127.35, 126.82, 120.07, 23.00, 18.85. **HRMS** (ESI): *m/z* [M + H]<sup>+</sup> calcd for C<sub>21</sub>H<sub>20</sub>N: 286.1596, found 286.1588.

**(E)-4-chloro-6-(1,2-diphenylvinyl)-2,3-dimethylpyridine (3ga):**

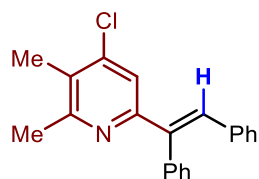

<sup>1</sup>H NMR (500 MHz, CDCl<sub>3</sub>) δ 7.89 (s, 1H), 7.44 – 7.35 (m, 3H), 7.23 (dd, *J* = 7.6, 1.6 Hz, 2H), 7.14 – 7.08 (m, 3H), 7.03 (dd, *J* = 6.8, 2.8 Hz, 2H), 6.73 (s, 1H), 2.63 (s, 3H), 2.34 (s, 3H). <sup>13</sup>C NMR (126 MHz, CDCl<sub>3</sub>) δ 157.95, 155.96, 144.19, 139.43, 138.70, 136.68, 130.80, 130.16, 129.99, 129.06, 128.02, 127.83, 127.68, 127.18, 120.77, 24.04, 15.41. HRMS (ESI): *m/z* [M + H]<sup>+</sup> calcd for C<sub>21</sub>H<sub>19</sub>ClN:320.1206, found 320.1212.

**(E)-2-(1,2-diphenylvinyl)-5,6,7,8-tetrahydroquinoline (3ha):**

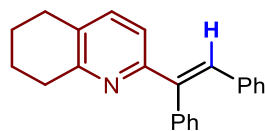

<sup>1</sup>H NMR (500 MHz, CDCl<sub>3</sub>) δ 7.72 (s, 1H), 7.30 – 7.20 (m, 3H), 7.18 – 7.13 (m, 2H), 7.06 (d, *J* = 8.0 Hz, 1H), 7.02 – 6.96 (m, 3H), 6.96 – 6.91 (m, 2H), 6.54 (d, *J* = 8.0 Hz, 1H), 2.92 (t, *J* = 6.5 Hz, 2H), 2.63 (t, *J* = 6.3 Hz, 2H), 1.86 – 1.79 (m, 2H), 1.74 – 1.67 (m, 2H). <sup>13</sup>C NMR (126 MHz, CDCl<sub>3</sub>) δ 156.77, 155.76, 140.56, 139.47, 137.03, 136.76, 130.77, 130.22, 129.89, 129.78, 128.77, 127.69, 127.32, 126.80, 119.90, 32.91, 28.49, 23.15, 22.75. HRMS (ESI): *m/z* [M + H]<sup>+</sup> calcd for C<sub>23</sub>H<sub>22</sub>N :312.1752, found 312.1760.

**(E)-2-(1,2-diphenylvinyl)quinoline (3ia):**

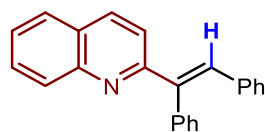

<sup>1</sup>H NMR (500 MHz, CDCl<sub>3</sub>) δ 8.17 (dd, *J* = 8.5, 1.1 Hz, 1H), 7.96 (t, *J* = 4.3 Hz, 2H), 7.76 – 7.68 (m, 2H), 7.51 – 7.46 (m, 1H), 7.43 – 7.35 (m, 3H), 7.30 (dd, *J* = 7.6, 1.9 Hz, 2H), 7.15 – 7.09 (m, 6H). <sup>13</sup>C NMR (126 MHz, CDCl<sub>3</sub>) δ 159.25, 148.08, 141.10, 139.32, 136.92, 136.09, 132.62, 130.49, 130.30, 129.75, 129.74, 129.13, 128.03, 127.81, 127.54, 127.49, 127.35, 126.29, 120.95. HRMS (ESI): *m/z* [M + Na]<sup>+</sup> calcd for C<sub>23</sub>H<sub>17</sub>NNa: 330.1259, found 330.1254.

**(E)-2-(1,2-di-p-tolylvinyl)-6-methylpyridine (3ab):**

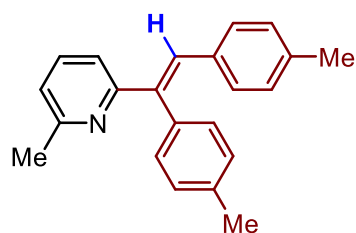

<sup>1</sup>H NMR (500 MHz, CDCl<sub>3</sub>) δ 7.84 (s, 1H), 7.40 (t, *J* = 7.7 Hz, 1H), 7.21 (d, *J* = 7.8 Hz, 2H), 7.15 (d, *J* = 8.0 Hz, 2H), 7.03 – 6.90 (m, 5H), 6.72 (d, *J* = 7.9 Hz, 1H), 2.64 (s, 3H), 2.42 (s, 3H), 2.27 (s, 3H). <sup>13</sup>C NMR (126 MHz, CDCl<sub>3</sub>) δ 158.49, 157.80, 139.69, 137.05, 136.86, 136.56, 136.35, 134.28, 130.43, 130.17, 130.01, 129.68, 128.61, 121.39, 119.53, 24.88, 21.38, 21.24. HRMS (ESI): *m/z* [M + H]<sup>+</sup> calcd for C<sub>22</sub>H<sub>22</sub>N: 300.1752, found 300.1757.

**(E)-2-(1,2-bis(4-chlorophenyl)vinyl)-6-methylpyridine (3ac):**

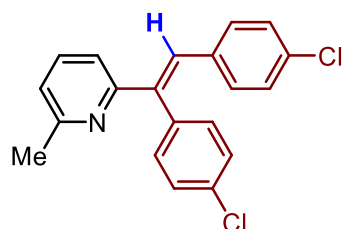

<sup>1</sup>H NMR (500 MHz, CDCl<sub>3</sub>) δ 7.81 (s, 1H), 7.42 (t, *J* = 7.7 Hz, 1H), 7.38 – 7.34 (m, 2H), 7.18 – 7.14 (m, 2H), 7.12 – 7.08 (m, 2H), 7.03 (d, *J* = 7.6 Hz, 1H), 6.97 (d, *J* = 8.5 Hz, 2H), 6.68 (d, *J* = 7.8 Hz, 1H), 2.62 (s, 3H). <sup>13</sup>C NMR (126 MHz, CDCl<sub>3</sub>) δ 158.07, 157.29, 140.00, 137.34, 136.49, 135.12, 133.63, 132.92, 131.65, 131.06, 129.79, 129.26, 128.16, 121.95, 119.48, 24.77. HRMS (ESI): *m/z* [M + H]<sup>+</sup> calcd for C<sub>20</sub>H<sub>16</sub>Cl<sub>2</sub>N: 340.0660, found 340.0654.

**(E)-2-(1,2-bis(4-bromophenyl)vinyl)-6-methylpyridine (3ad):**

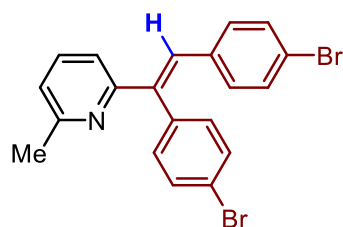

<sup>1</sup>H NMR (500 MHz, CDCl<sub>3</sub>) δ 7.78 (s, 1H), 7.55 – 7.50 (m, 2H), 7.43 (t, *J* = 7.7 Hz, 1H), 7.30 – 7.26 (m, 2H), 7.12 – 7.09 (m, 2H), 7.05 (d, *J* = 7.5 Hz, 1H), 6.94 – 6.89 (m, 2H), 6.69 (d, *J* = 7.8 Hz, 1H), 2.62 (s, 3H). <sup>13</sup>C NMR (126 MHz, CDCl<sub>3</sub>) δ 158.15, 157.29, 140.20, 137.86, 136.55, 135.60, 132.26, 132.00, 131.39, 131.18, 129.88, 122.03, 121.87, 121.29, 119.56, 24.78. HRMS (ESI): *m/z* [M + H]<sup>+</sup> calcd for C<sub>20</sub>H<sub>16</sub>Br<sub>2</sub>N: 427.9649, found 427.9650.



**(Z)-2-(1,2-di(thiophen-2-yl)vinyl)-6-methylpyridine (3ae):**

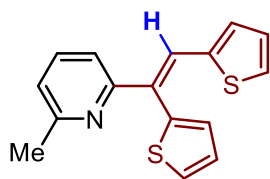

**<sup>1</sup>H NMR** (500 MHz, CDCl<sub>3</sub>) δ 8.40 (s, 1H), 7.56 (dd, *J* = 5.2, 1.2 Hz, 1H), 7.44 (t, *J* = 7.7 Hz, 1H), 7.23 – 7.15 (m, 3H), 7.03 (dd, *J* = 3.4, 1.2 Hz, 1H), 7.02 – 6.98 (m, 1H), 6.94 (dd, *J* = 5.1, 3.7 Hz, 1H), 6.82 (d, *J* = 7.8 Hz, 1H), 2.62 (s, 3H). **<sup>13</sup>C NMR** (126 MHz, CDCl<sub>3</sub>) δ 157.68, 156.64, 140.55, 138.46, 136.67, 131.20, 129.68, 129.01, 128.36, 127.98, 127.72, 127.14, 126.28, 121.54, 118.95, 24.76. **HRMS** (ESI): *m/z* [M + H]<sup>+</sup> calcd for C<sub>16</sub>H<sub>14</sub>NS<sub>2</sub>: 284.0568, found 284.0559.

**(E)-2-methyl-6-(oct-4-en-4-yl)pyridine (3af):**

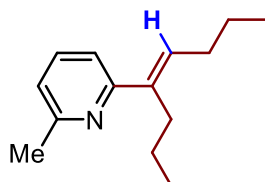

**<sup>1</sup>H NMR** (500 MHz, Chloroform-*d*) δ 7.48 (t, *J* = 7.7 Hz, 1H), 7.13 (d, *J* = 7.9 Hz, 1H), 6.95 (d, *J* = 7.6 Hz, 1H), 6.20 (t, *J* = 7.3 Hz, 1H), 2.59 (t, *J* = 7.8 Hz, 2H), 2.53 (s, 3H), 2.22 (q, *J* = 7.3 Hz, 2H), 1.50 (h, *J* = 7.4 Hz, 2H), 1.44 – 1.38 (m, 2H), 0.97 (t, *J* = 7.3 Hz, 3H), 0.90 (d, *J* = 7.2 Hz, 3H). **<sup>13</sup>C NMR** (126 MHz, Chloroform-*d*) δ 159.53, 157.35, 139.91, 136.31, 131.75, 120.64, 117.31, 30.78, 30.38, 24.75, 22.86, 22.11, 14.16, 14.09. **HRMS** (ESI): *m/z* [M + Na]<sup>+</sup> calcd for C<sub>14</sub>H<sub>21</sub>NNa: 226.1572, found 226.1567.

**(E)-2-(dec-5-en-5-yl)-6-methylpyridine (3ag):**

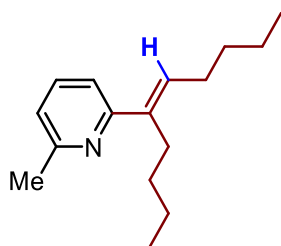

**<sup>1</sup>H NMR** (500 MHz, CDCl<sub>3</sub>) δ 7.48 (t, *J* = 7.7 Hz, 1H), 7.13 (d, *J* = 7.8 Hz, 1H), 6.95 (d, *J* = 7.5 Hz, 1H), 6.20 (t, *J* = 7.3 Hz, 1H), 2.60 (t, *J* = 7.3 Hz, 2H), 2.53 (s, 3H), 2.24 (q, *J* = 7.4 Hz, 2H), 1.47 – 1.31 (m, 8H), 0.94 – 0.87 (m, 6H). **<sup>13</sup>C NMR** (126 MHz, CDCl<sub>3</sub>) δ 159.51, 157.34, 153.18, 136.31, 131.72, 120.62, 117.27, 31.86, 31.18, 28.34, 28.04, 24.73, 22.79, 22.58, 14.00, 13.96. **HRMS** (ESI): *m/z* [M + Na]<sup>+</sup> calcd for C<sub>16</sub>H<sub>25</sub>NNa: 254.1588, found 254.1580.

**(E)-2-methyl-6-(1-phenylprop-1-en-1-yl)pyridine (3ah):**

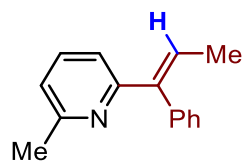

**<sup>1</sup>H NMR** (500 MHz, CDCl<sub>3</sub>) δ 7.43 – 7.37 (m, 2H), 7.37 – 7.31 (m, 2H), 7.25 – 7.19 (m, 2H), 7.04 (q, *J* = 7.2 Hz, 1H), 6.96 (d, *J* = 7.6 Hz, 1H), 6.60 (d, *J* = 7.8 Hz, 1H), 2.59 (s, 3H), 1.76 (d, *J* = 7.2 Hz, 3H). **<sup>13</sup>C NMR** (126 MHz, CDCl<sub>3</sub>) δ 157.85, 157.66, 141.55, 138.96, 136.30, 130.06, 128.32, 127.85, 126.95, 121.08, 119.05, 24.79, 15.40. **HRMS** (ESI): *m/z* [M+H]<sup>+</sup> calcd for C<sub>15</sub>H<sub>16</sub>N: 210.1283, found 210.1293.

**(E)-2-methyl-6-(1-phenylprop-1-en-2-yl)pyridine (3ai):**

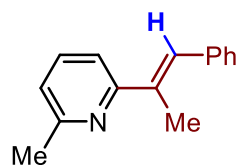

**<sup>1</sup>H NMR** (500 MHz, CDCl<sub>3</sub>) δ 7.57 (t, *J* = 7.7 Hz, 1H), 7.47 (d, *J* = 1.5 Hz, 1H), 7.44 – 7.40 (m, 2H), 7.38 (t, *J* = 7.7 Hz, 2H), 7.32 (d, *J* = 7.8 Hz, 1H), 7.26 (s, 1H), 7.05 (d, *J* = 7.6 Hz, 1H), 2.60 (s, 3H), 2.35 (d, *J* = 1.4 Hz, 3H). **<sup>13</sup>C NMR** (126 MHz, CDCl<sub>3</sub>) δ 159.31, 157.55, 138.14, 136.57, 129.93, 129.37, 128.08, 126.68, 121.38, 117.17, 24.77, 15.95. **HRMS** (ESI): *m/z* [M+H]<sup>+</sup> calcd for C<sub>15</sub>H<sub>16</sub>N: 210.1283, found 210.1293.

**(E)-2-(1,2-bis(4-chlorophenyl)vinyl)quinoline (3ic):**

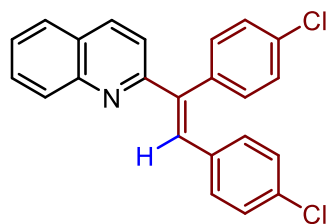

**<sup>1</sup>H NMR** (500 MHz, CDCl<sub>3</sub>) δ 8.14 (d, *J* = 8.6 Hz, 1H), 8.01 (d, *J* = 8.6 Hz, 1H), 7.86 (s, 1H), 7.80 – 7.69 (m, 2H), 7.54 – 7.49 (m, 1H), 7.41 – 7.36 (m, 2H), 7.24 – 7.19 (m, 2H), 7.18 – 7.12 (m, 2H), 7.07 (dd, *J* = 19.8, 8.5 Hz, 3H). **<sup>13</sup>C NMR** (126 MHz, CDCl<sub>3</sub>) δ 158.37, 147.93, 140.48, 137.20, 136.21, 135.00, 133.89, 133.34, 131.75, 131.63, 131.26, 129.82, 129.61, 129.38, 128.31, 127.41, 127.29, 126.44, 120.52. **HRMS** (ESI): *m/z* [M + H]<sup>+</sup> calcd for C<sub>23</sub>H<sub>16</sub>Cl<sub>2</sub>N: 376.0660, found 376.0652.

**(E)-2-(1-phenylprop-1-en-2-yl)quinoline (3ih):**

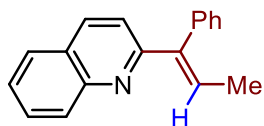

$^1\text{H NMR}$  (500 MHz,  $\text{CDCl}_3$ )  $\delta$  8.16 (d,  $J = 8.5$  Hz, 1H), 7.98 (d,  $J = 8.6$  Hz, 1H), 7.75 (dd,  $J = 16.8, 7.6$  Hz, 2H), 7.53 – 7.43 (m, 3H), 7.40 (d,  $J = 7.1$  Hz, 1H), 7.32 (d,  $J = 7.7$  Hz, 2H), 7.15 (d,  $J = 7.3$  Hz, 1H), 7.07 (d,  $J = 8.6$  Hz, 1H), 1.91 (d,  $J = 7.2$  Hz, 3H).  $^{13}\text{C NMR}$  (126 MHz,  $\text{CDCl}_3$ )  $\delta$  159.00, 147.86, 142.06, 138.63, 135.82, 130.13, 129.97, 129.48, 129.40, 128.40, 127.30, 127.16, 127.03, 125.85, 120.75, 15.71. **HRMS** (ESI):  $m/z$   $[\text{M} + \text{H}]^+$  calcd for  $\text{C}_{18}\text{H}_{16}\text{N}$ : 246.1283, found 246.1275.

**(E)-2-(1-phenylprop-1-en-1-yl)quinoline (3ii):**

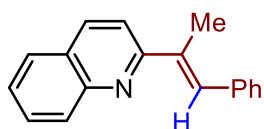

$^1\text{H NMR}$  (500 MHz,  $\text{CDCl}_3$ )  $\delta$  8.17 – 8.10 (m, 2H), 7.81 (d,  $J = 8.1$  Hz, 1H), 7.76 (d,  $J = 8.6$  Hz, 1H), 7.71 (t,  $J = 7.7$  Hz, 1H), 7.50 (t,  $J = 5.9$  Hz, 4H), 7.42 (t,  $J = 7.5$  Hz, 2H), 7.30 (t,  $J = 7.3$  Hz, 1H), 2.53 (s, 3H).  $^{13}\text{C NMR}$  (126 MHz,  $\text{CDCl}_3$ )  $\delta$  160.13, 147.79, 137.90, 137.67, 136.15, 131.74, 129.61, 129.49, 129.46, 128.24, 127.35, 127.12, 127.05, 126.10, 118.73, 16.12. **HRMS** (ESI):  $m/z$   $[\text{M} + \text{H}]^+$  calcd for  $\text{C}_{18}\text{H}_{16}\text{N}$ : 246.1283, found 246.1275.

**(E)-4-chloro-6-(1,2-di-p-tolylvinyl)-2,3-dimethylpyridine (3gb):**

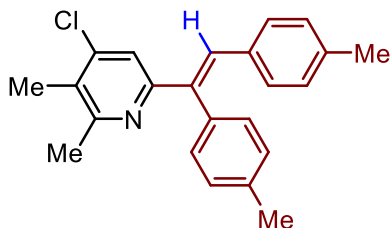

$^1\text{H NMR}$  (500 MHz,  $\text{CDCl}_3$ )  $\delta$  7.82 (s, 1H), 7.20 (d,  $J = 7.8$  Hz, 2H), 7.12 – 7.08 (m, 2H), 6.94 (d,  $J = 1.6$  Hz, 4H), 6.73 (s, 1H), 2.62 (d,  $J = 2.1$  Hz, 3H), 2.41 (s, 3H), 2.33 (d,  $J = 2.0$  Hz, 3H), 2.25 (d,  $J = 2.2$  Hz, 3H).  $^{13}\text{C NMR}$  (126 MHz,  $\text{CDCl}_3$ )  $\delta$  157.84, 156.41, 144.16, 138.54, 137.24, 137.01, 135.82, 134.00, 130.60, 130.01, 129.95, 129.80, 128.61, 127.72, 120.64, 24.03, 21.36, 21.20, 15.39. **HRMS** (ESI):  $m/z$   $[\text{M} + \text{H}]^+$  calcd for  $\text{C}_{23}\text{H}_{23}\text{ClN}$ : 348.1519, found 348.1510.

**(E)-6-(1,2-bis(4-bromophenyl)vinyl)-2,3-dimethylpyridine (3gd) :**

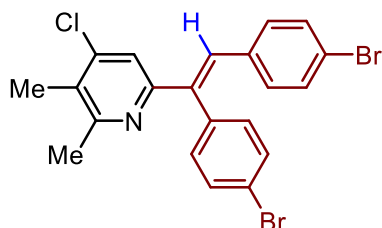

<sup>1</sup>H NMR (500 MHz, CDCl<sub>3</sub>) δ 7.78 (s, 1H), 7.61 – 7.44 (m, 2H), 7.27 (dt, *J* = 4.7, 2.7 Hz, 2H), 7.15 – 7.01 (m, 2H), 6.89 (d, *J* = 8.5 Hz, 2H), 6.71 (s, 1H), 2.62 (s, 3H), 2.35 (s, 3H). <sup>13</sup>C NMR (126 MHz, CDCl<sub>3</sub>) δ 158.26, 155.20, 144.35, 139.10, 137.24, 135.35, 132.43, 131.89, 131.37, 131.23, 130.09, 128.59, 122.11, 121.47, 120.74, 23.99, 15.45. HRMS (ESI): *m/z* [M + H]<sup>+</sup> calcd for C<sub>21</sub>H<sub>17</sub>Br<sub>2</sub>ClN :477.9396, found 477.9430.

**(Z)-4-chloro-6-(1,2-di(thiophen-2-yl)vinyl)-2,3-dimethylpyridine (3ge):**

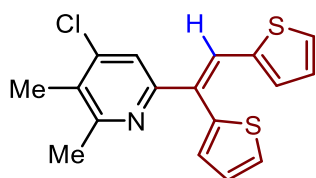

<sup>1</sup>H NMR (500 MHz, CDCl<sub>3</sub>) δ 8.37 (s, 1H), 7.57 (d, *J* = 5.1 Hz, 1H), 7.23 – 7.21 (m, 1H), 7.19 (d, *J* = 5.0 Hz, 1H), 7.16 (d, *J* = 3.6 Hz, 1H), 7.02 (d, *J* = 3.4 Hz, 1H), 6.94 (t, *J* = 4.5 Hz, 1H), 6.83 (s, 1H), 2.62 (s, 3H), 2.33 (s, 3H). <sup>13</sup>C NMR (126 MHz, CDCl<sub>3</sub>) δ 157.78, 154.68, 144.46, 140.33, 137.68, 131.35, 129.12, 128.62, 128.56, 128.11, 127.98, 127.94, 127.37, 126.32, 120.14, 24.01, 15.44. HRMS (ESI): *m/z* [M + H]<sup>+</sup> calcd for C<sub>17</sub>H<sub>15</sub>ClNS<sub>2</sub> :332.0334, found 332.0344.

**(E)-4-chloro-2,3-dimethyl-6-(1-phenylprop-1-en-1-yl)pyridine (3gh):**

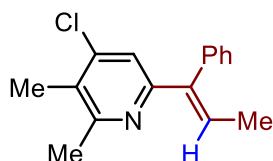

<sup>1</sup>H NMR (500 MHz, CDCl<sub>3</sub>) δ 7.41 (t, *J* = 7.4 Hz, 2H), 7.35 (d, *J* = 7.4 Hz, 1H), 7.23 – 7.12 (m, 2H), 7.02 (d, *J* = 7.2 Hz, 1H), 6.63 (s, 1H), 2.58 (s, 3H), 2.31 (s, 3H), 1.74 (d, *J* = 7.2 Hz, 3H). <sup>13</sup>C NMR (500 MHz, CDCl<sub>3</sub>) δ 157.79, 155.79, 144.10, 140.54, 138.30, 129.99, 128.47, 128.25, 127.45, 127.18, 120.25, 24.00, 15.42, 15.33. HRMS (ESI): *m/z* [M + H]<sup>+</sup> calcd for C<sub>16</sub>H<sub>17</sub>ClN :258.1050, found 258.1059.

**(E)-6-(1,2-diphenylvinyl)-2,2'-bipyridine (3ja):**

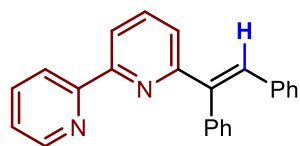

$^1\text{H NMR}$  (500 MHz,  $\text{CDCl}_3$ )  $\delta$  8.69 (ddd,  $J = 4.8, 1.8, 0.9$  Hz, 1H), 8.61 (dt,  $J = 8.0, 0.9$  Hz, 1H), 8.30 (dd,  $J = 7.8, 0.9$  Hz, 1H), 8.08 (s, 1H), 7.85 (td,  $J = 7.7, 1.8$  Hz, 1H), 7.67 (t,  $J = 7.8$  Hz, 1H), 7.47 – 7.37 (m, 3H), 7.37 – 7.28 (m, 3H), 7.18 – 7.06 (m, 5H), 6.97 (dd,  $J = 7.8, 0.9$  Hz, 1H).  $^{13}\text{C NMR}$  (126 MHz,  $\text{CDCl}_3$ )  $\delta$  157.79, 156.39, 155.22, 149.05, 140.47, 139.18, 137.24, 136.89, 136.85, 130.86, 130.30, 130.04, 128.99, 127.93, 127.58, 127.23, 123.71, 122.37, 121.27, 119.25. **HRMS** (ESI):  $m/z$   $[\text{M} + \text{H}]^+$  calcd for  $\text{C}_{24}\text{H}_{19}\text{N}_2$ : 335.1548, found 335.1561.

## 4. Further functionalization reactions

**(E)-6-(1,2-diphenylprop-1-en-1-yl)-2,2'-bipyridine**

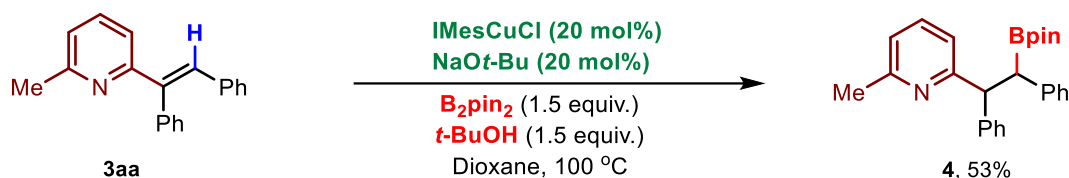

To an oven-dried Schlenk tube equipped with a magnetic stir bar,  $\text{IMesCuCl}$  (0.06 mmol, 24.3 mg),  $\text{NaOBu}^t$  (0.06 mmol, 5.8 mg), **3aa** (0.3 mmol, 81.4 mg) and  $\text{B}_2\text{Pin}_2$  (0.45 mmol, 114.3 mg) were added. The tube was evacuated and backfilled with argon (this process was repeated three times). Under argon atmosphere, dioxane (1.5 mL) and *tert*-butanol (0.45 mmol, 42  $\mu\text{L}$ ) were added into the tube. The resulting mixture was stirred at 100  $^\circ\text{C}$  for 48 h. After cooling to room temperature, the organic phases were concentrated in vacuo and purified by column chromatography to obtain the product **4** (64 mg, 53%) as a white solid.  $^1\text{H NMR}$  (500 MHz,  $\text{CDCl}_3$ )  $\delta$  7.63 – 7.58 (m, 2H), 7.24 (d,  $J = 7.4$  Hz, 3H), 7.19 – 7.06 (m, 5H), 7.00 – 6.95 (m, 1H), 6.79 (d,  $J = 7.7$  Hz, 1H), 6.69 (d,  $J = 7.6$  Hz, 1H), 4.53 (d,  $J = 12.5$  Hz, 1H), 3.66 (d,  $J = 12.5$  Hz, 1H), 2.41 (s, 3H), 0.90 (d,  $J = 7.8$  Hz, 12H).  $^{13}\text{C NMR}$  (126 MHz,  $\text{CDCl}_3$ )  $\delta$  161.78, 157.46, 144.03, 141.00, 135.91, 129.23, 128.78, 128.08, 127.89, 126.34, 125.10, 120.22, 119.59, 83.18, 56.27, 24.57, 24.42, 24.19. **HRMS** (ESI):  $m/z$   $[\text{M} + \text{H}]^+$  calcd for  $\text{C}_{26}\text{H}_{31}\text{BNO}_2$ : 400.2442, found 400.2483.

### (E)-2-(1,2-diphenylvinyl)-6-methylpyridine

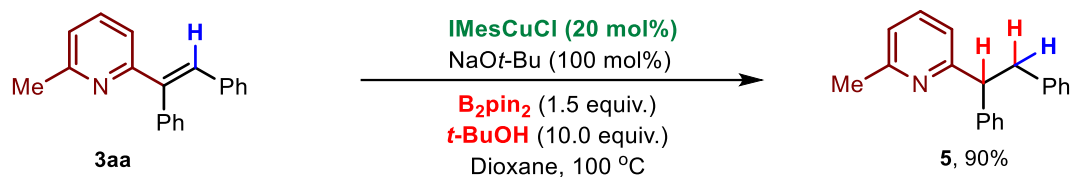

To an oven-dried Schlenk tube equipped with a magnetic stir bar, **IMesCuCl** (0.06 mmol, 24.3mg), **NaOBu<sup>t</sup>** (0.3 mmol, 28.8 mg), **3aa** (0.3 mmol, 81.4 mg) and **B<sub>2</sub>Pin<sub>2</sub>** (0.45 mmol, 114.3 mg) were added. The tube was evacuated and backfilled with argon (this process was repeated three times). Under argon atmosphere, dioxane (1.5 mL) and *tert*-butanol (3.0 mmol, 286  $\mu$ L) were added into the tube. The resulting mixture was stirred at 100 °C for 48 h. After cooling to room temperature, the organic phases were concentrated in vacuo and purified by column chromatography to obtain the product **5** (73.7 mg, 90%) as a transparent oily. **<sup>1</sup>H NMR** (500 MHz, CDCl<sub>3</sub>)  $\delta$  7.37 – 7.30 (m, 3H), 7.22 (dd, *J* = 10.4, 4.8 Hz, 2H), 7.15 – 7.11 (m, 3H), 7.09 – 7.03 (m, 3H), 6.88 (d, *J* = 7.7 Hz, 2H), 4.33 (t, *J* = 7.8 Hz, 1H), 3.63 (dd, *J* = 13.7, 7.8 Hz, 1H), 3.30 (dd, *J* = 13.7, 7.8 Hz, 1H), 2.53 (s, 3H). **<sup>13</sup>C NMR** (126 MHz, CDCl<sub>3</sub>)  $\delta$  162.34, 157.78, 143.63, 140.67, 136.43, 129.20, 128.34, 128.31, 128.04, 126.37, 125.80, 120.81, 119.86, 55.52, 41.64, 24.75.

## 5. References

- [1]. O. Santoro, A. Collado, A. M. Slawin, S. P. Nolan, C. S. Cazin, *Chem. Commun.*, 2013, **49**, 10483.
- [2]. M. J. Mio, L. C. Kopel, J. B. Braun, T. L. Gadzikwa, K. L. Hull, R. G. Brisbois, C. J. Markworth, P. A. Grieco, *Org. Lett.*, 2002, **4**, 3199.

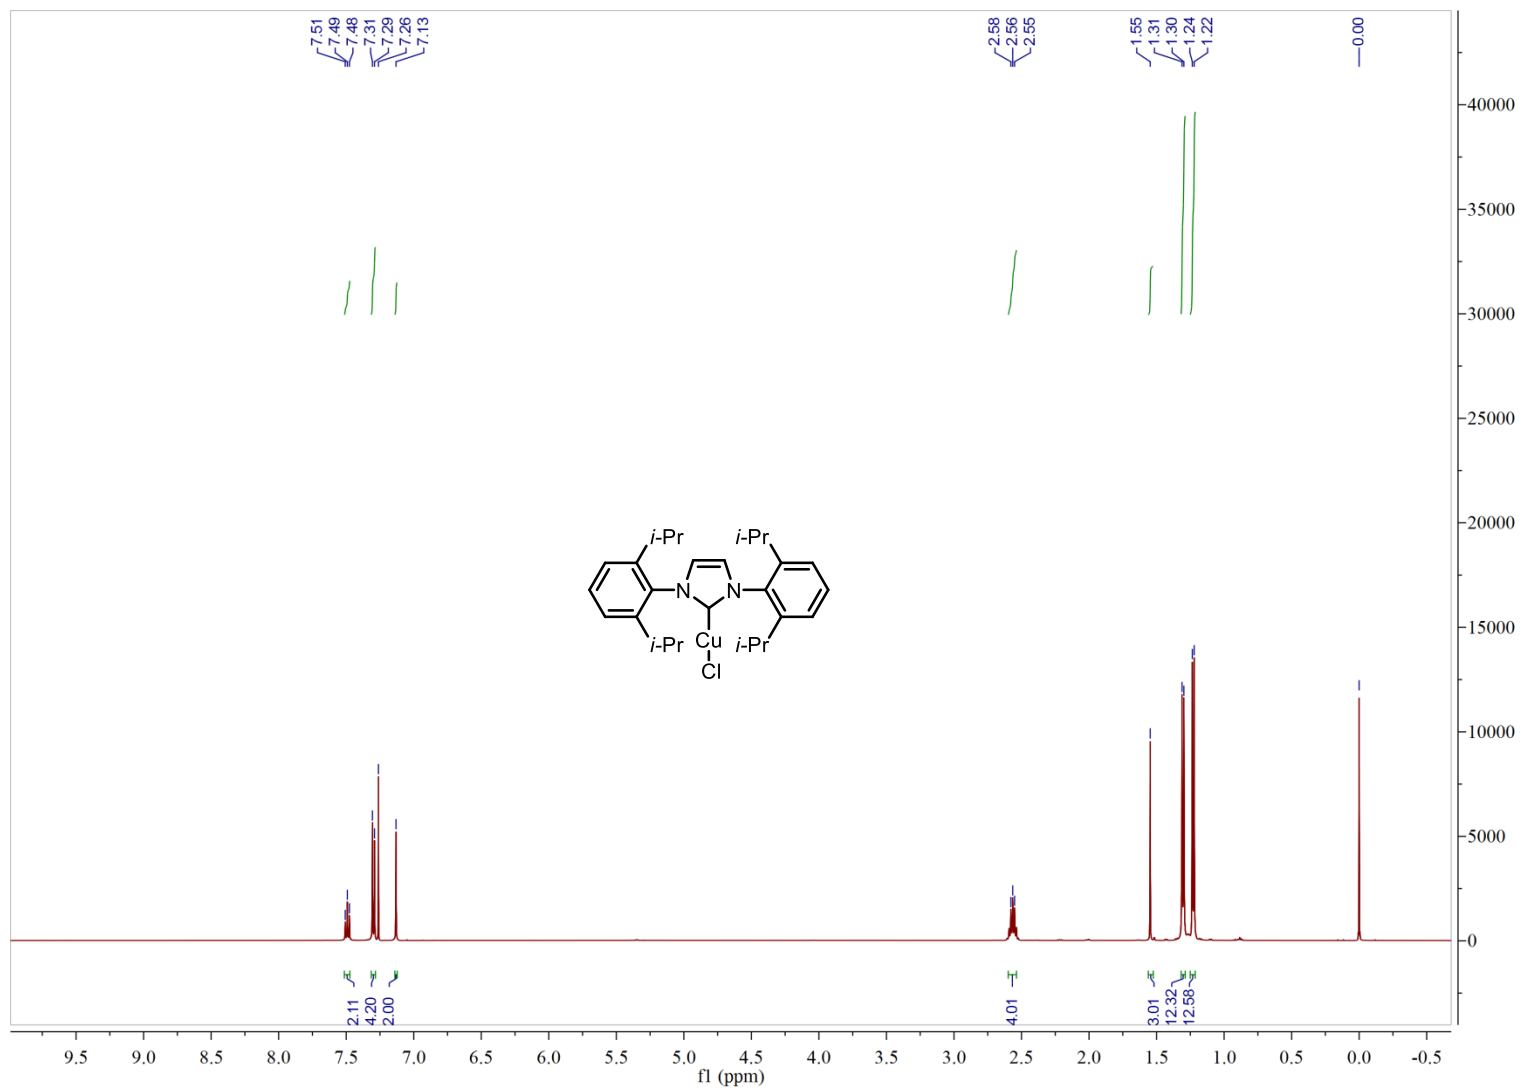





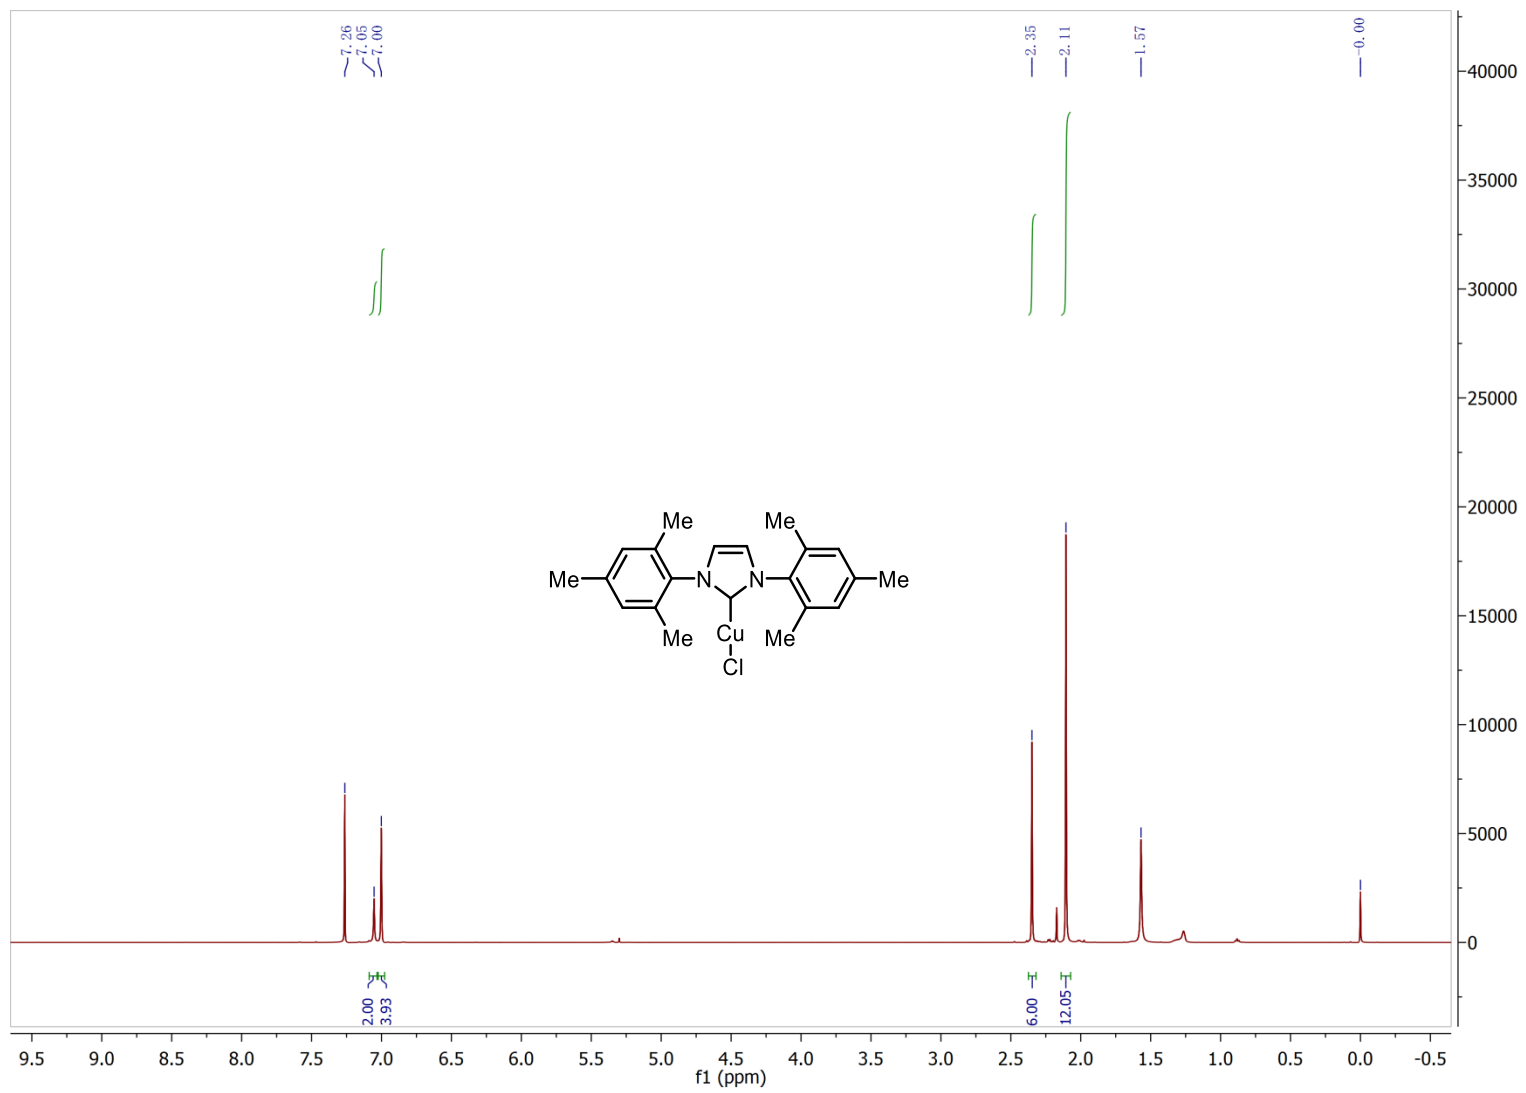

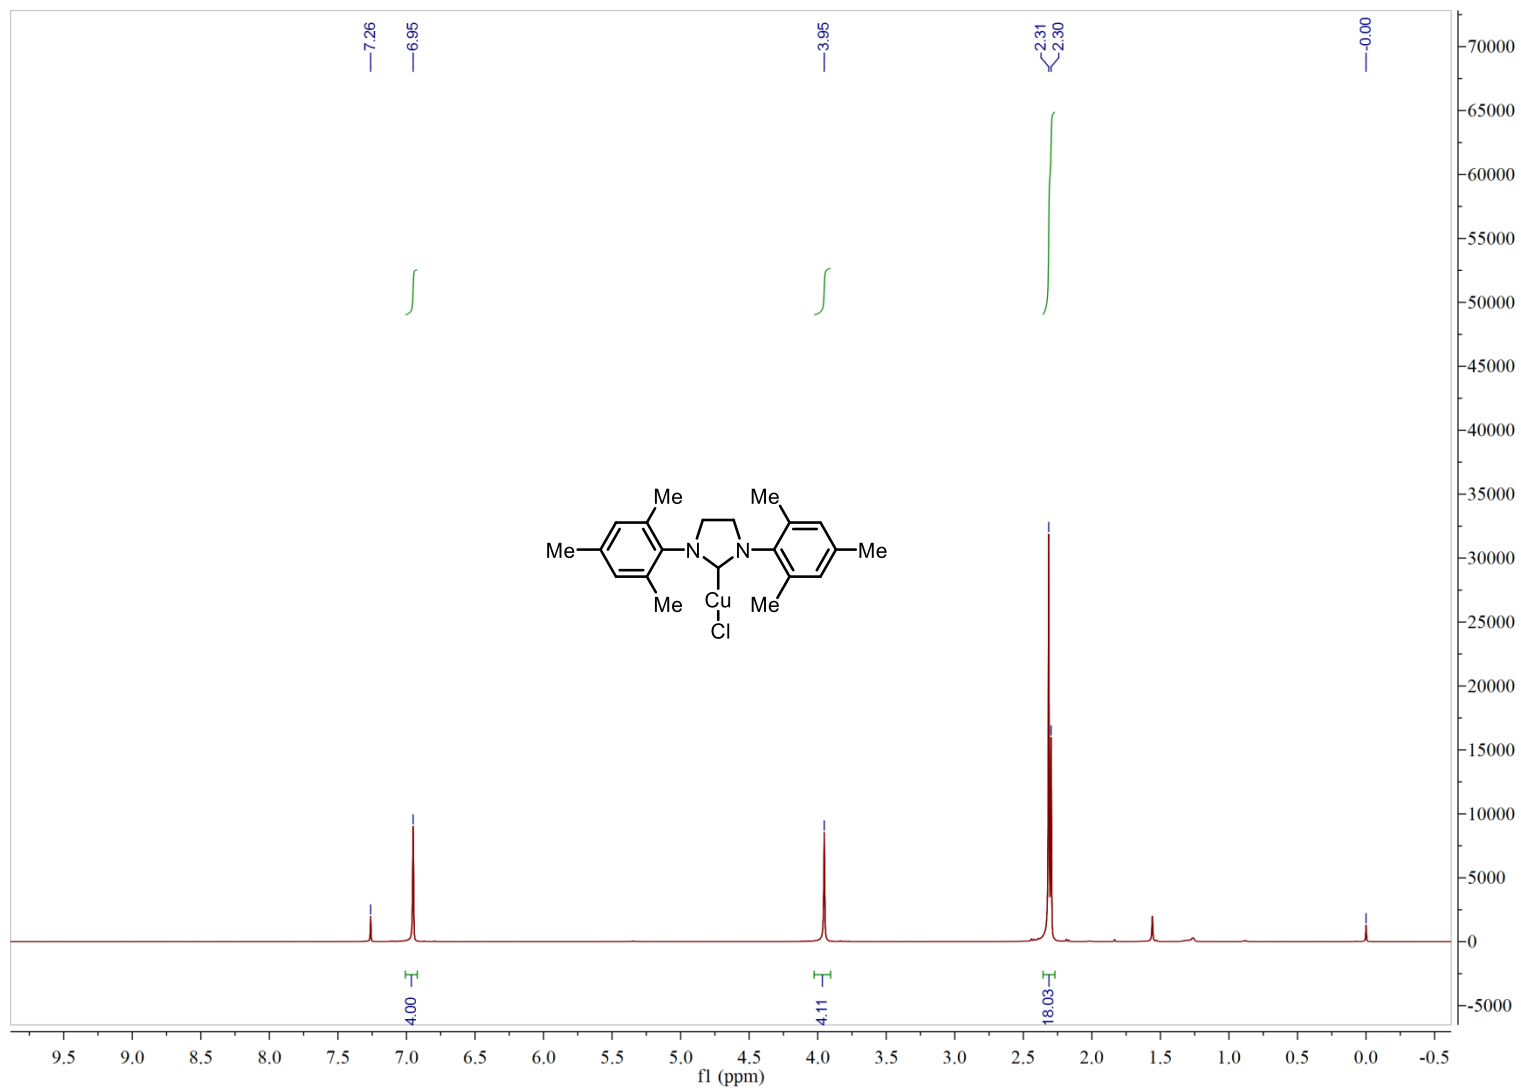

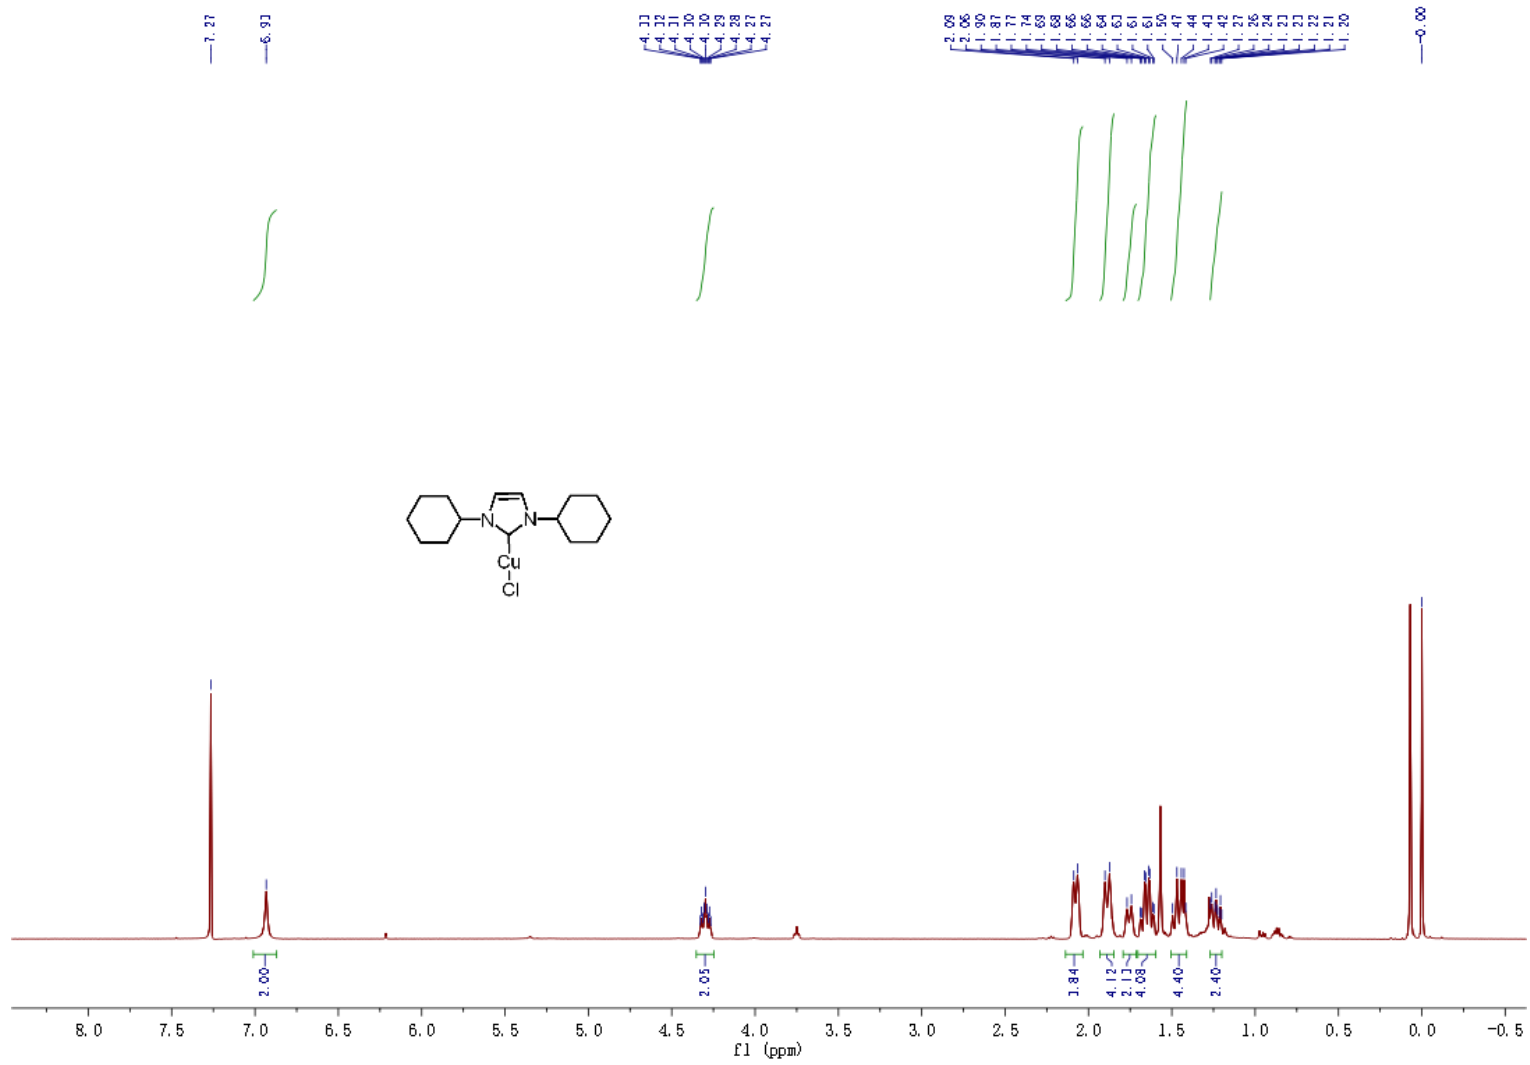

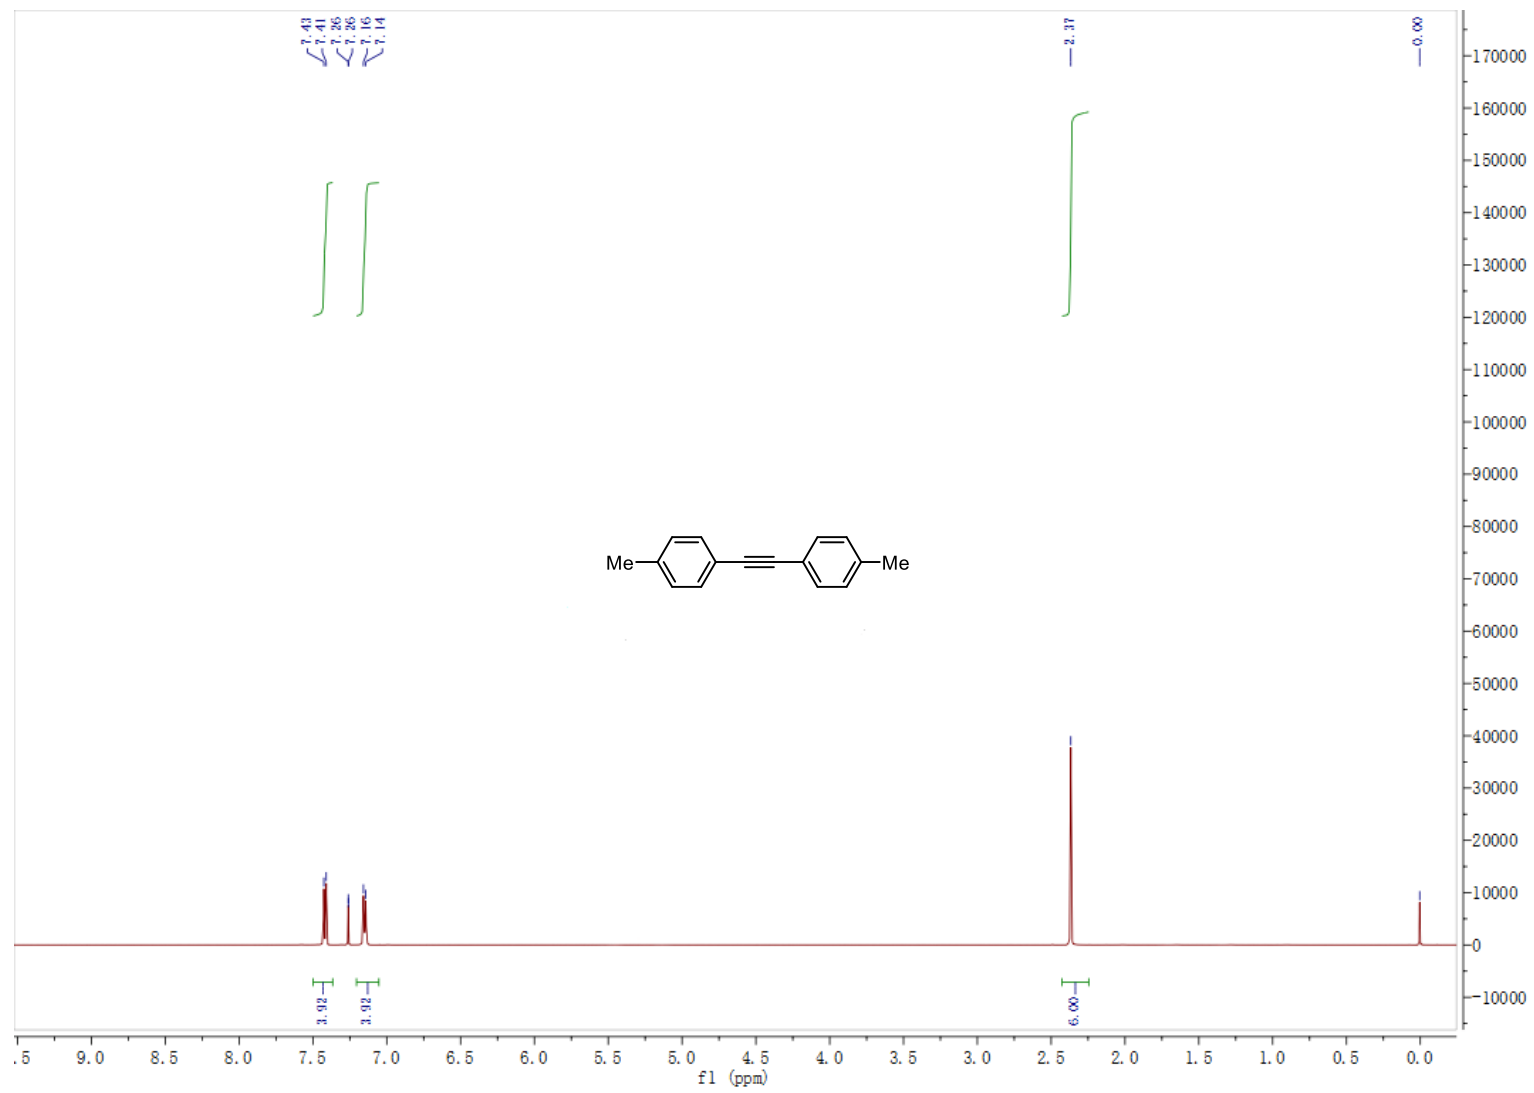

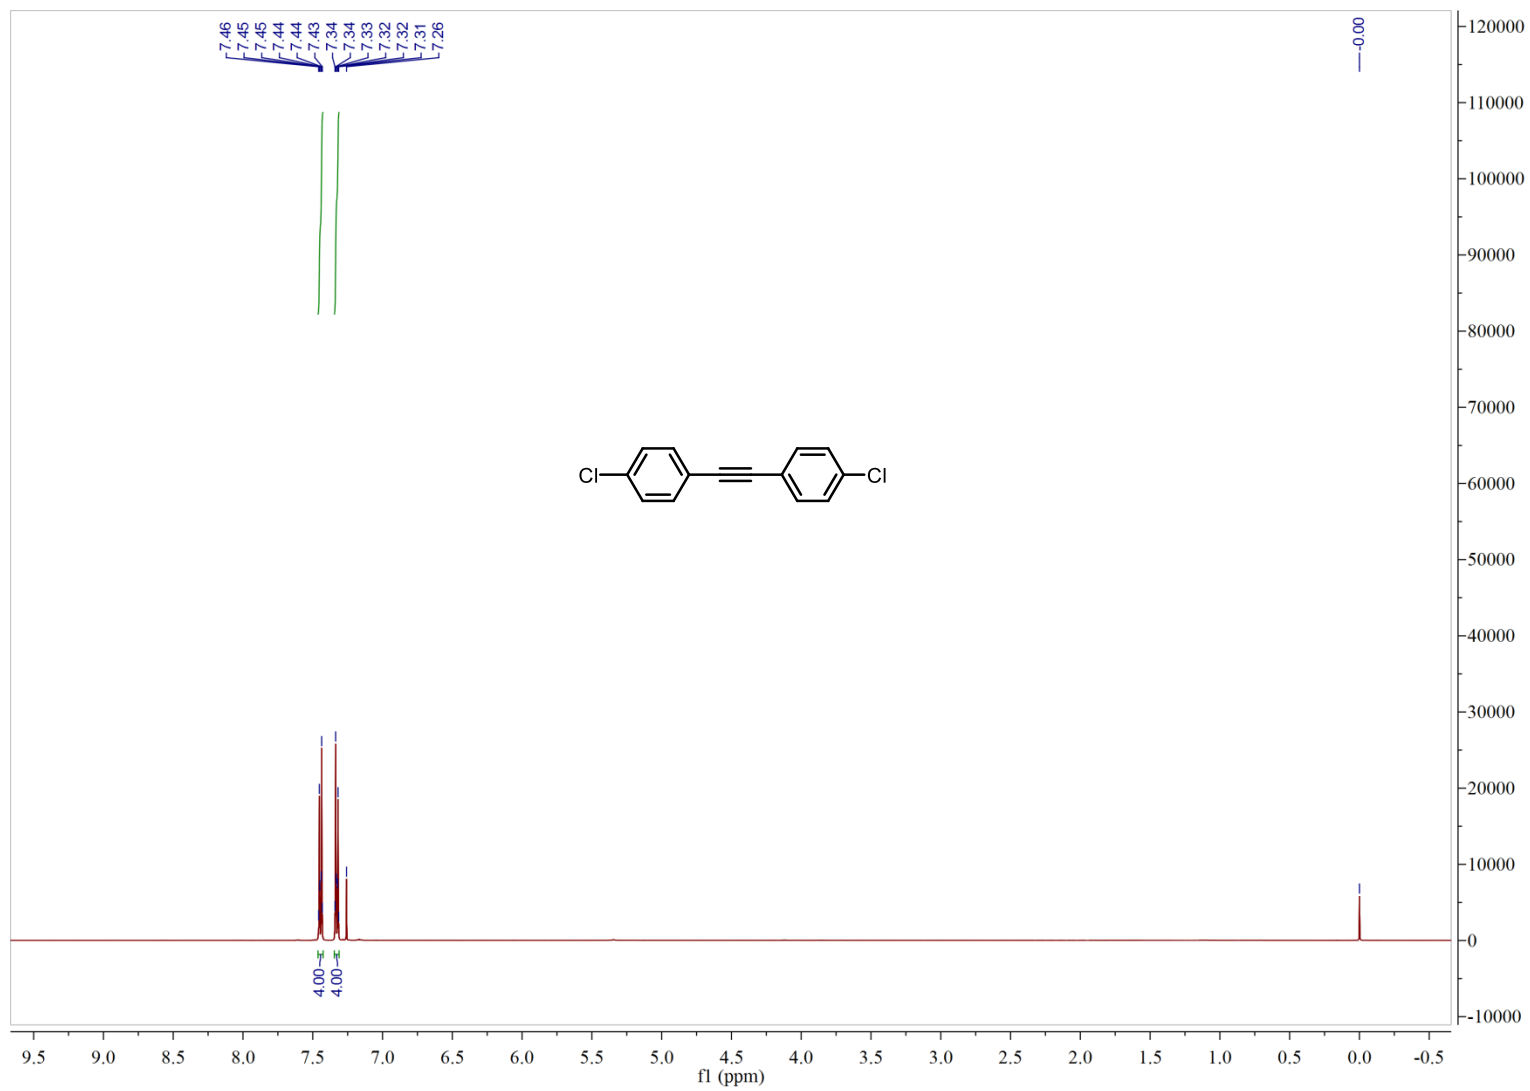

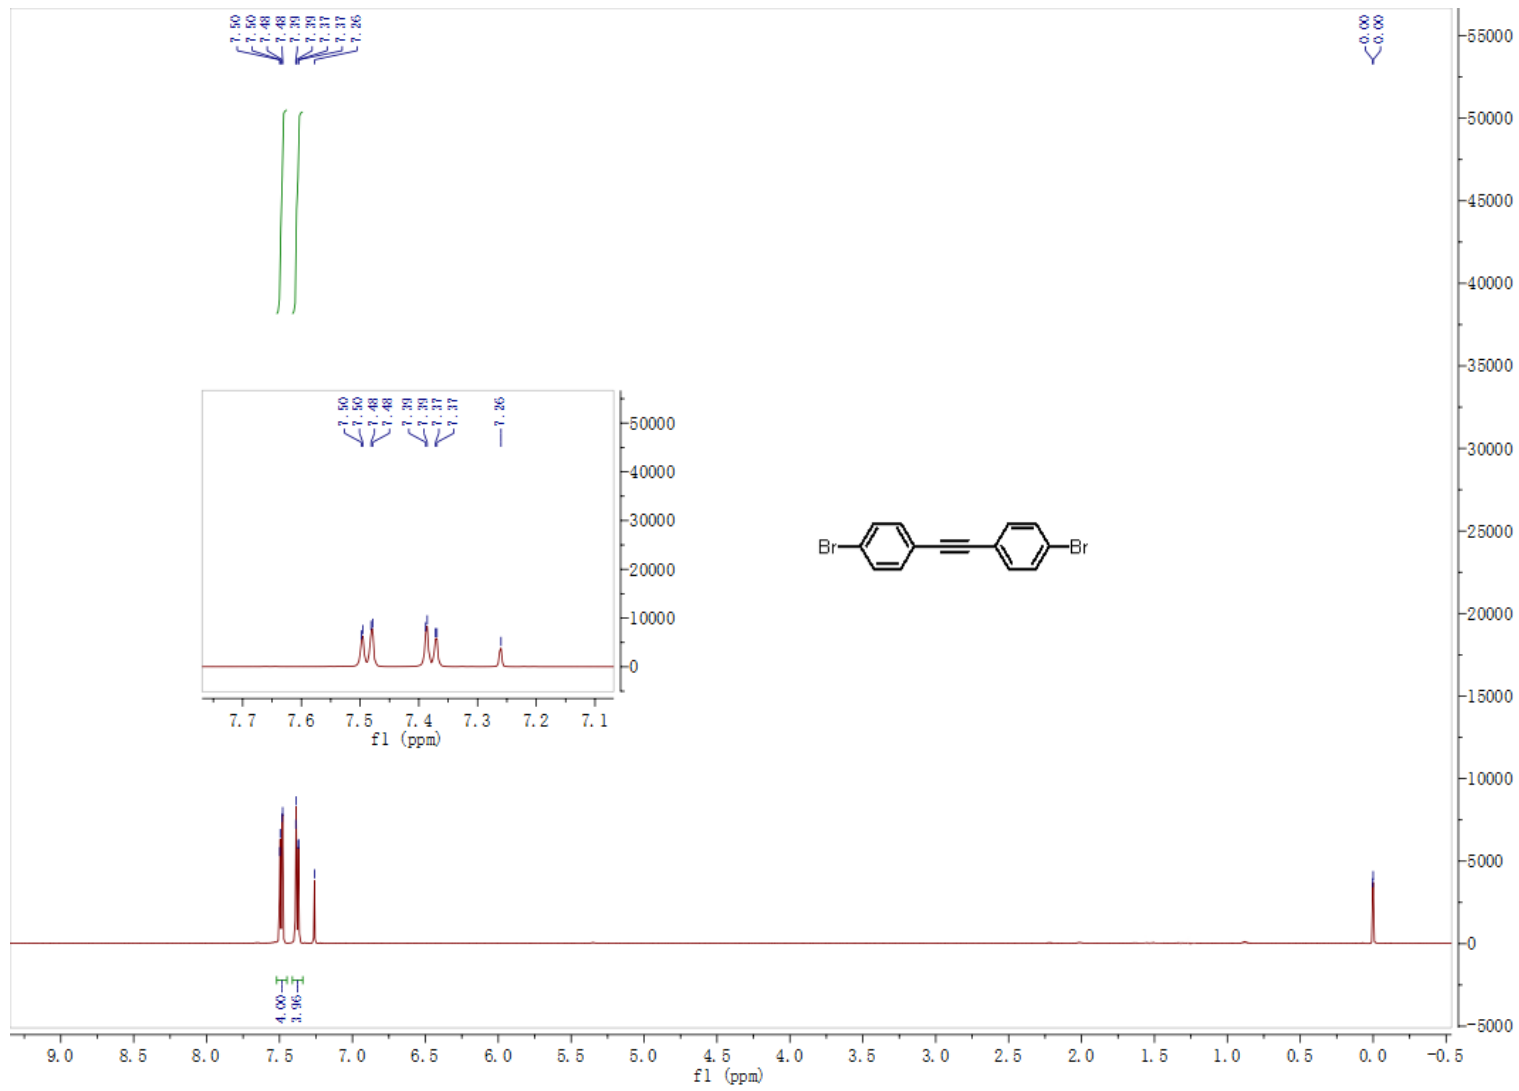

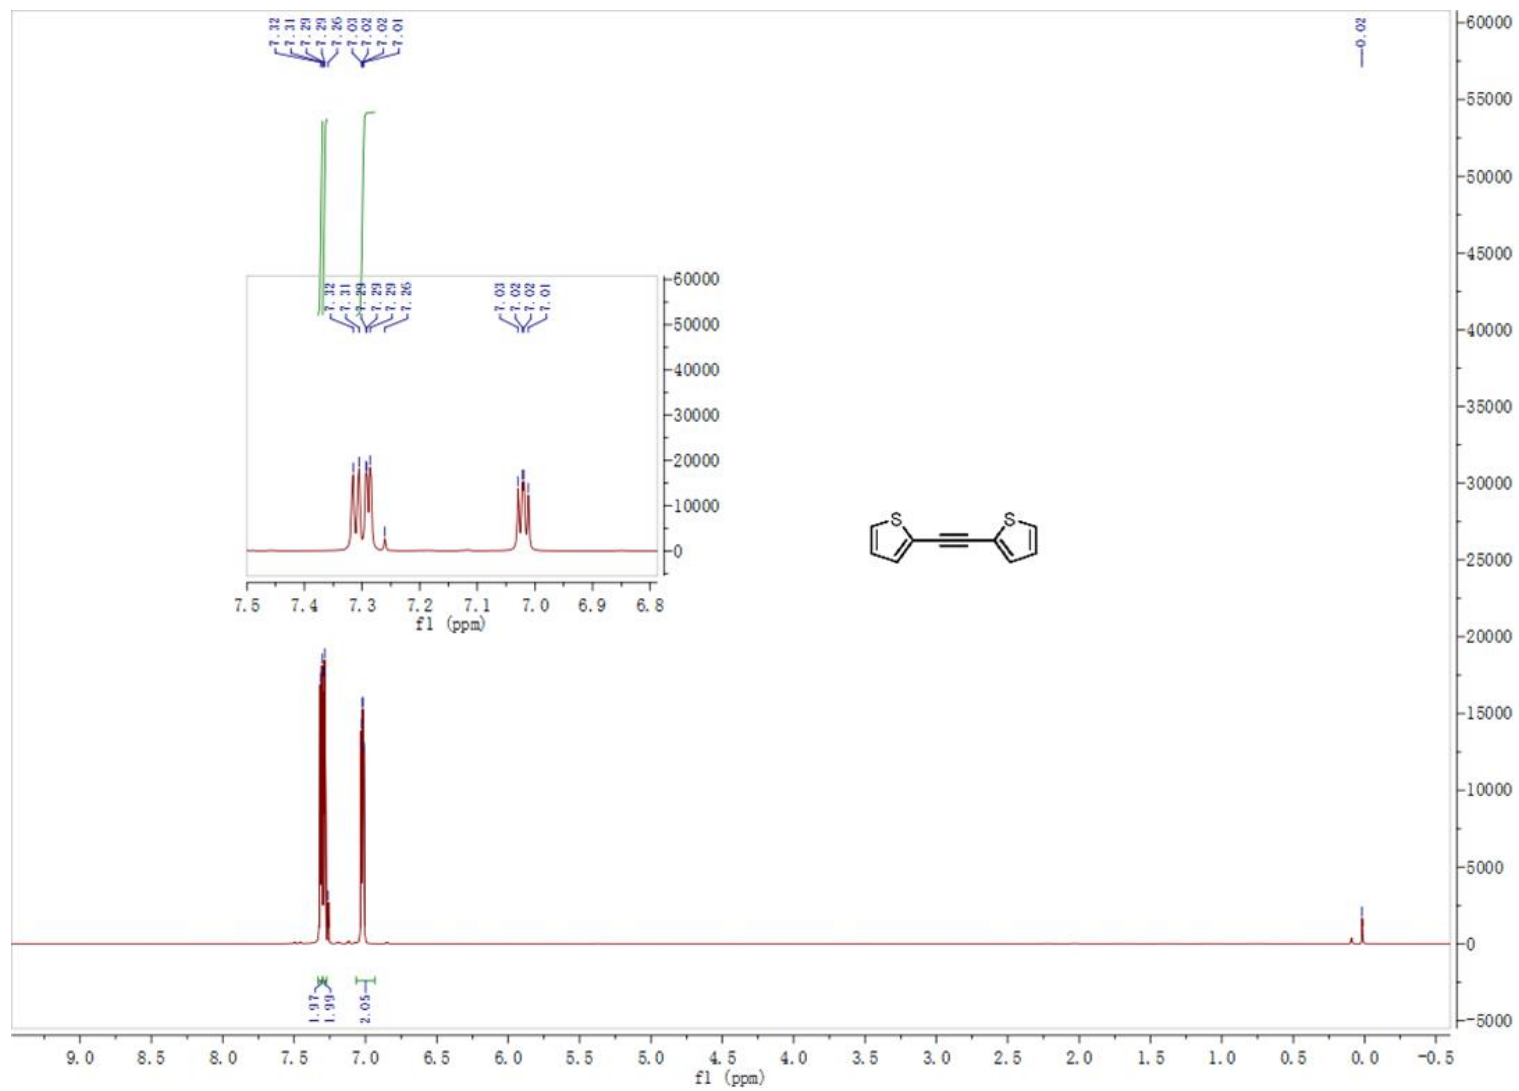

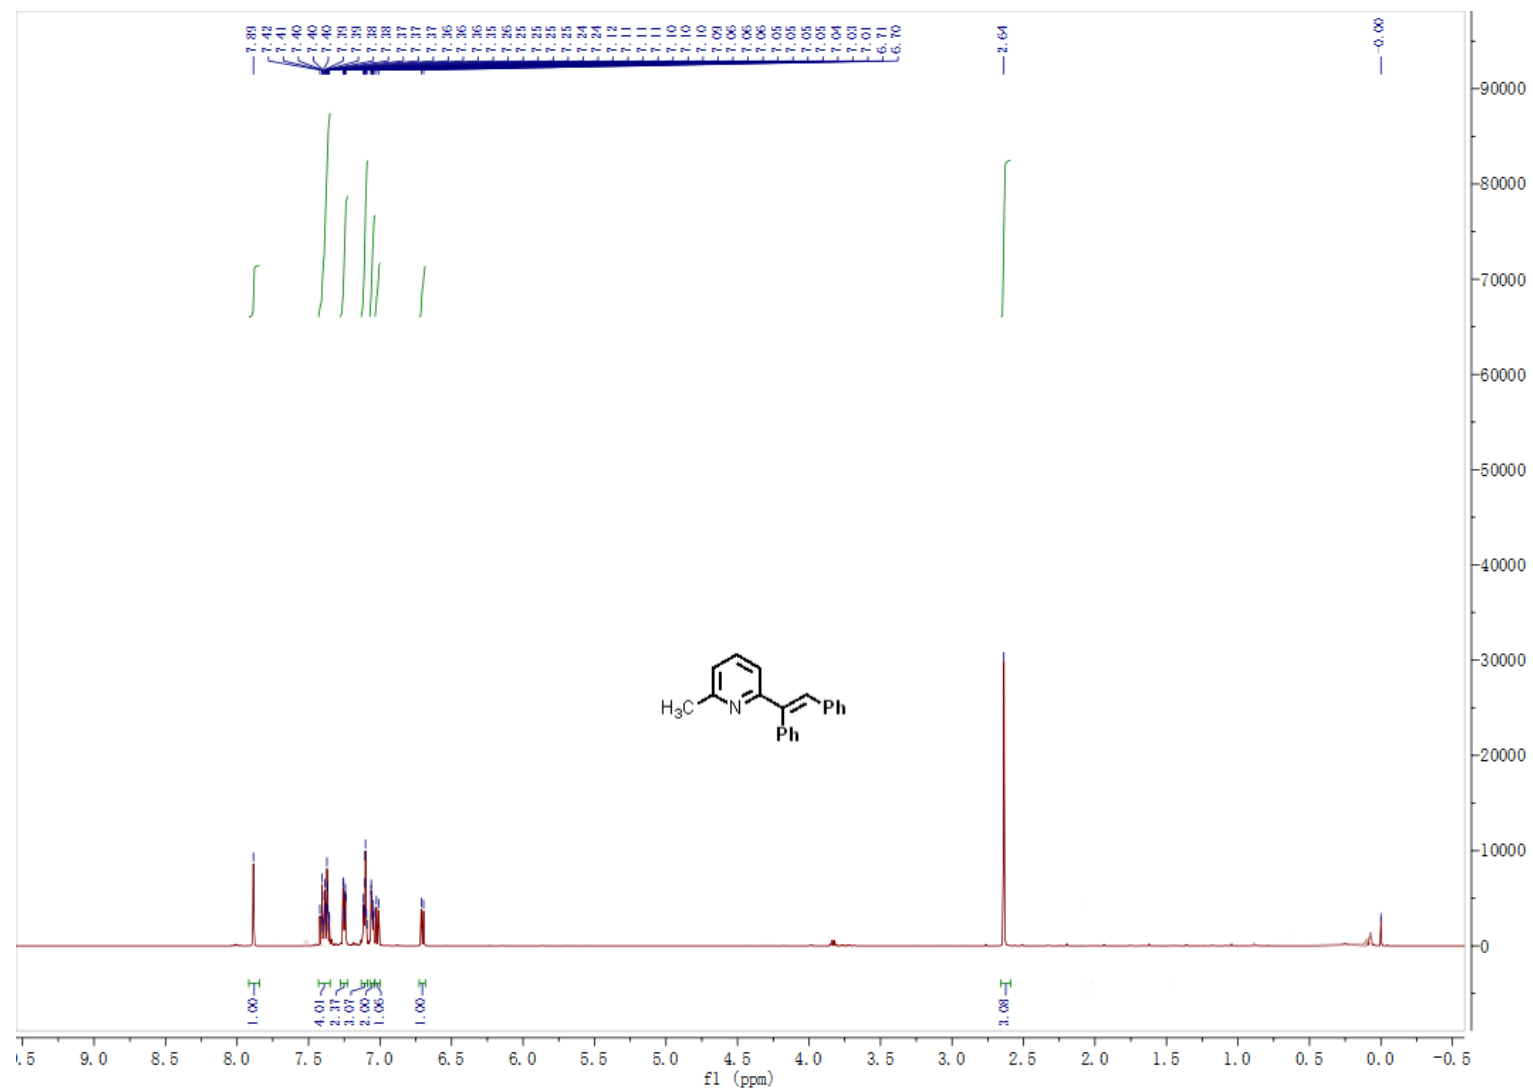



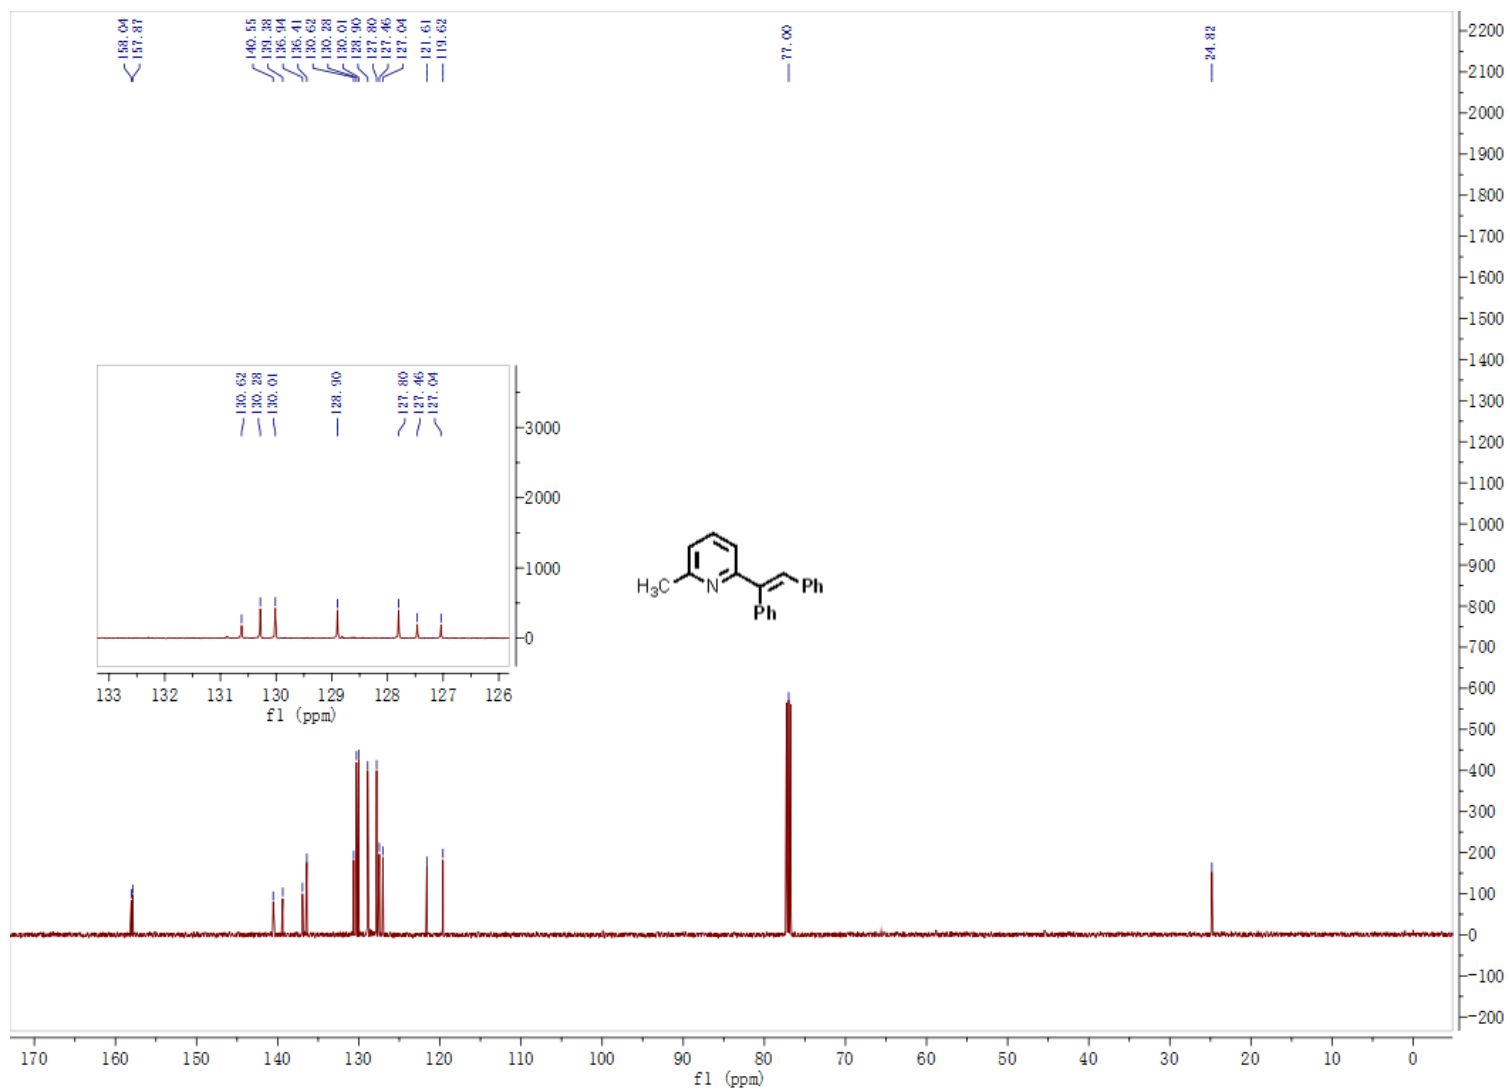

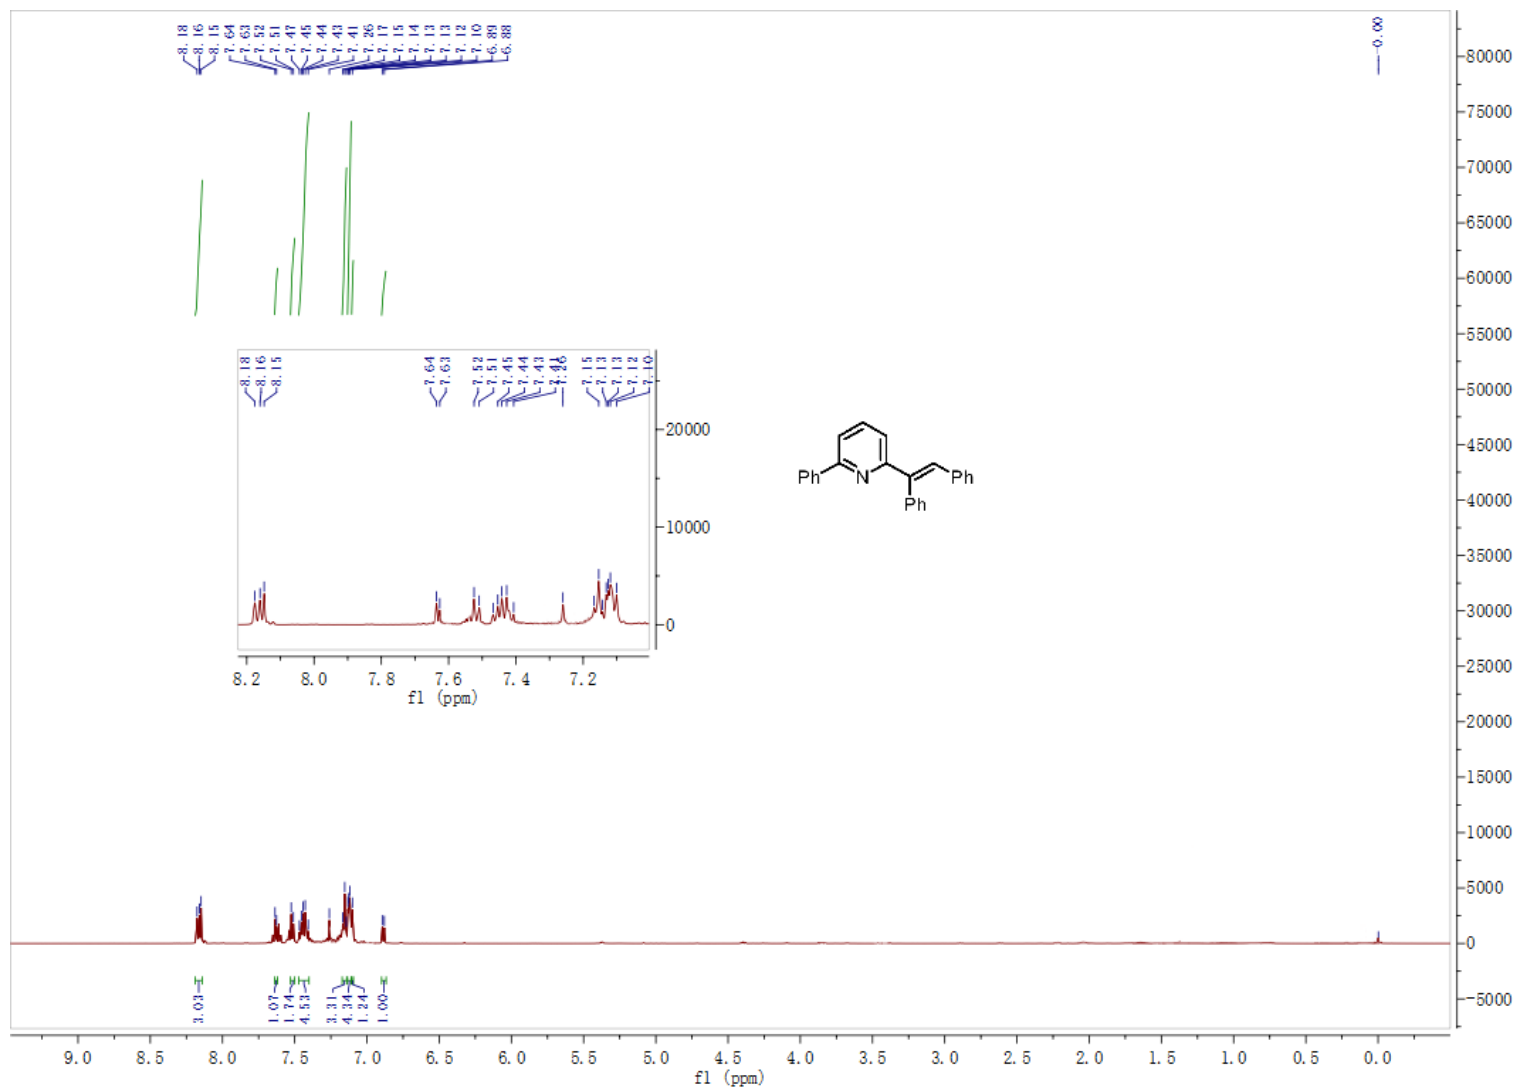

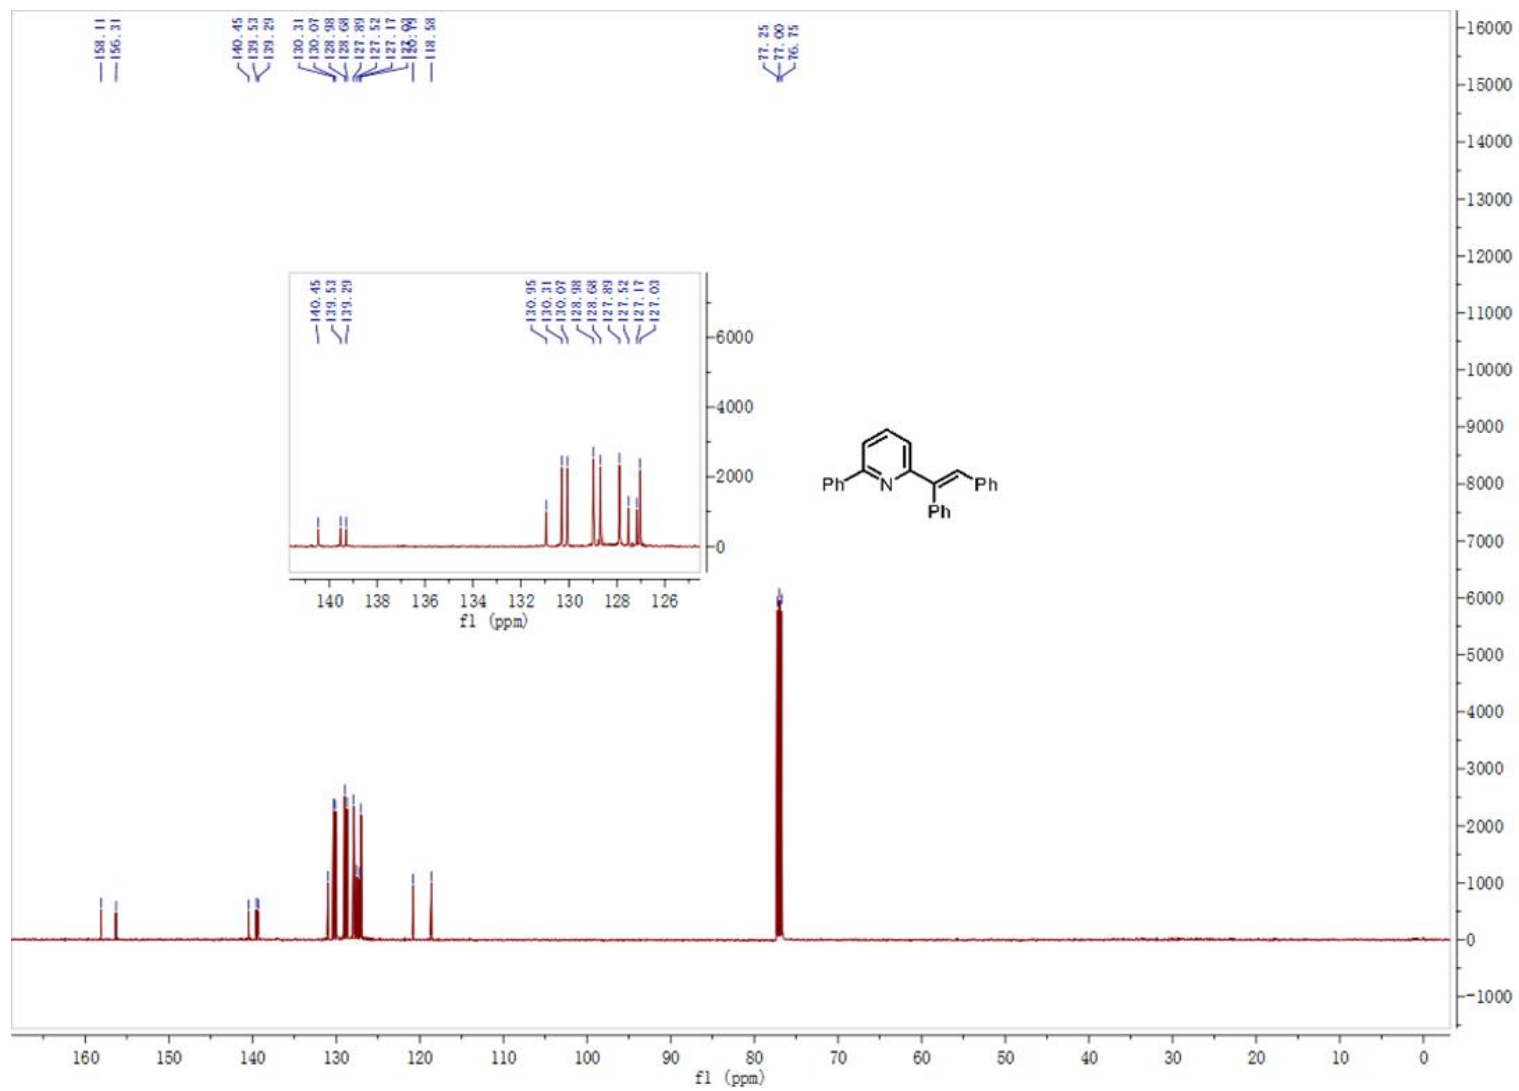

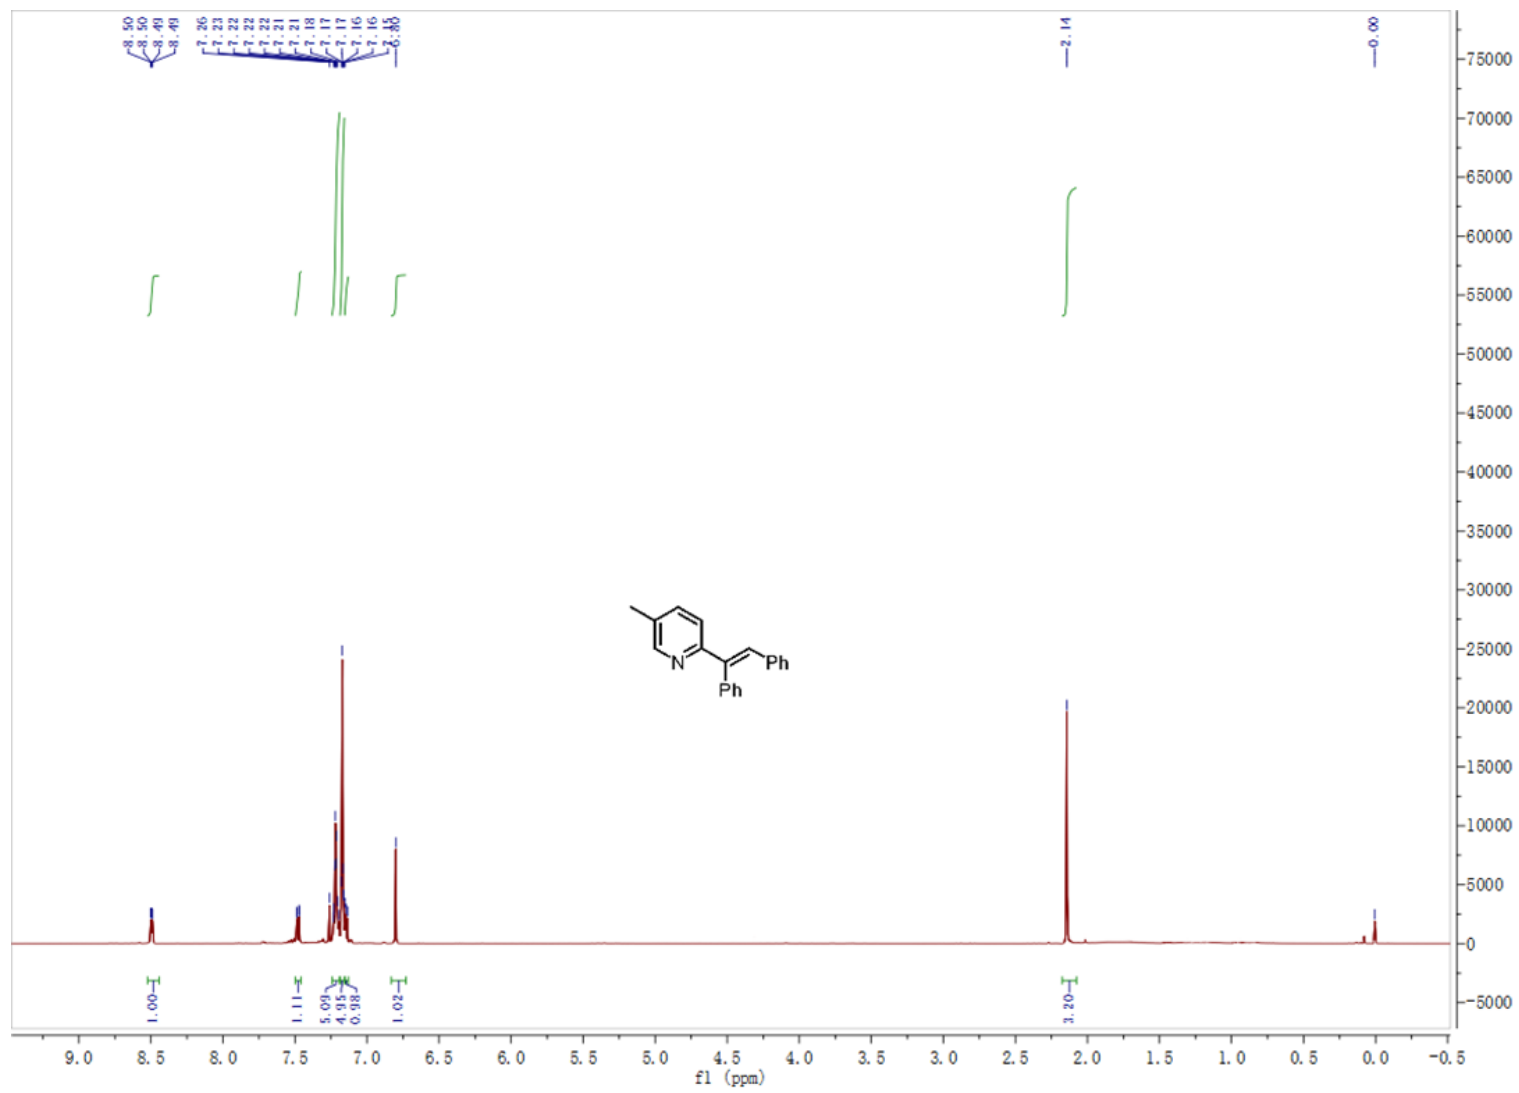

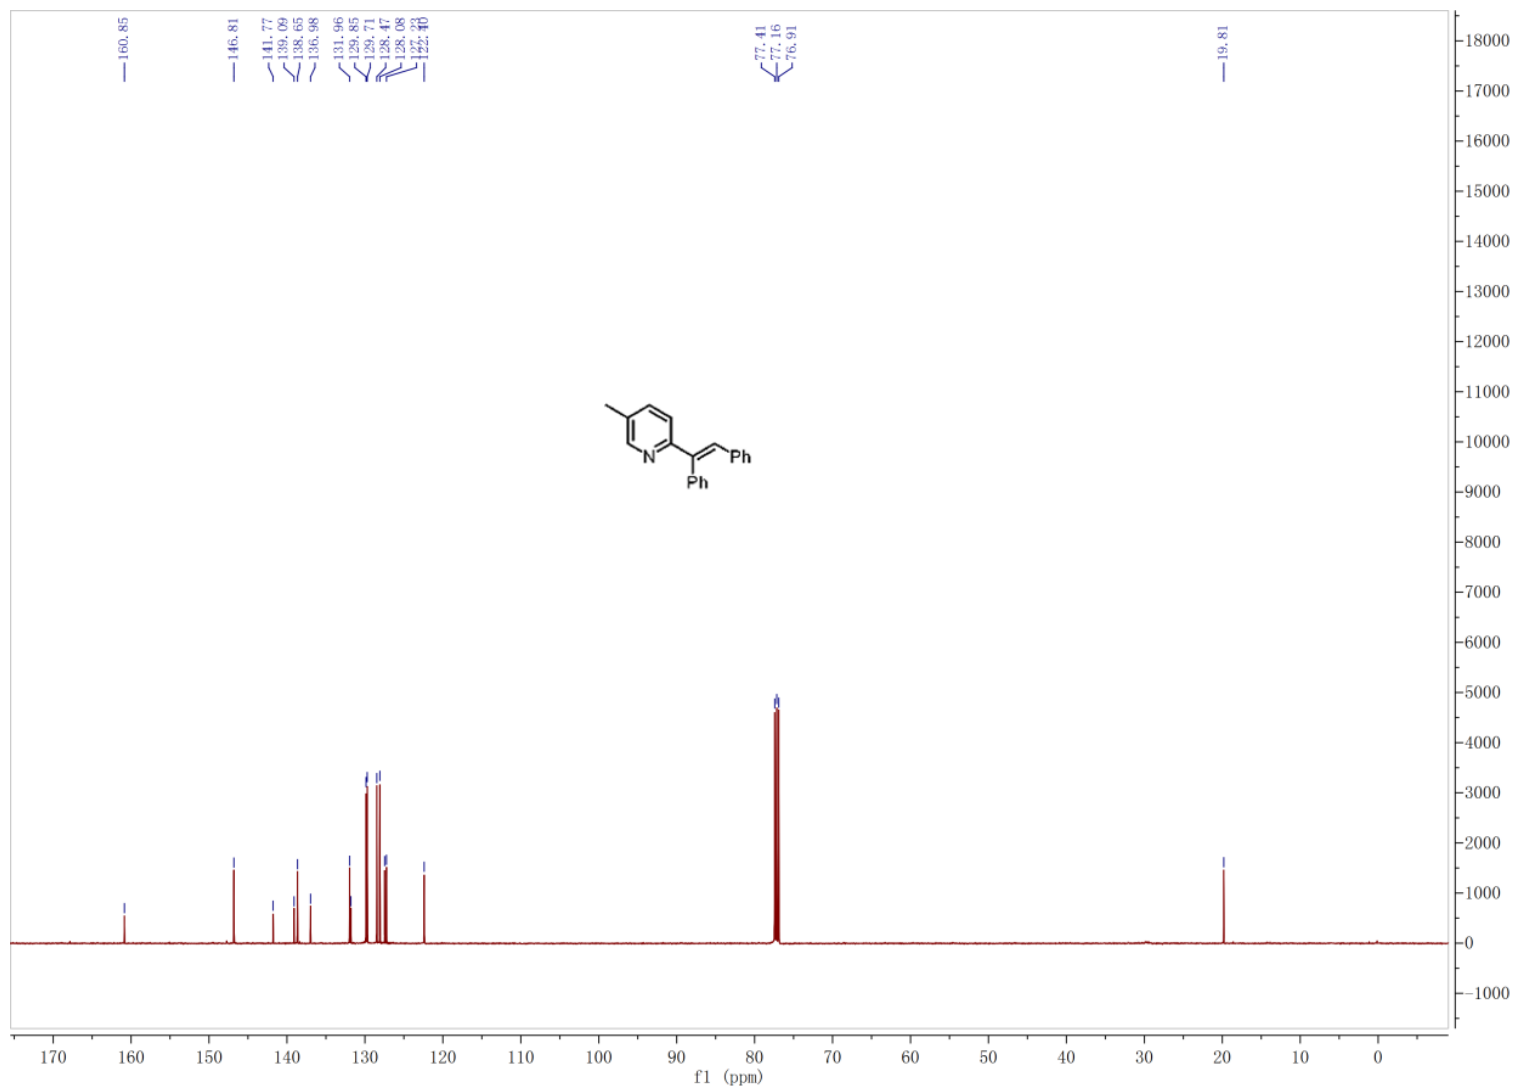

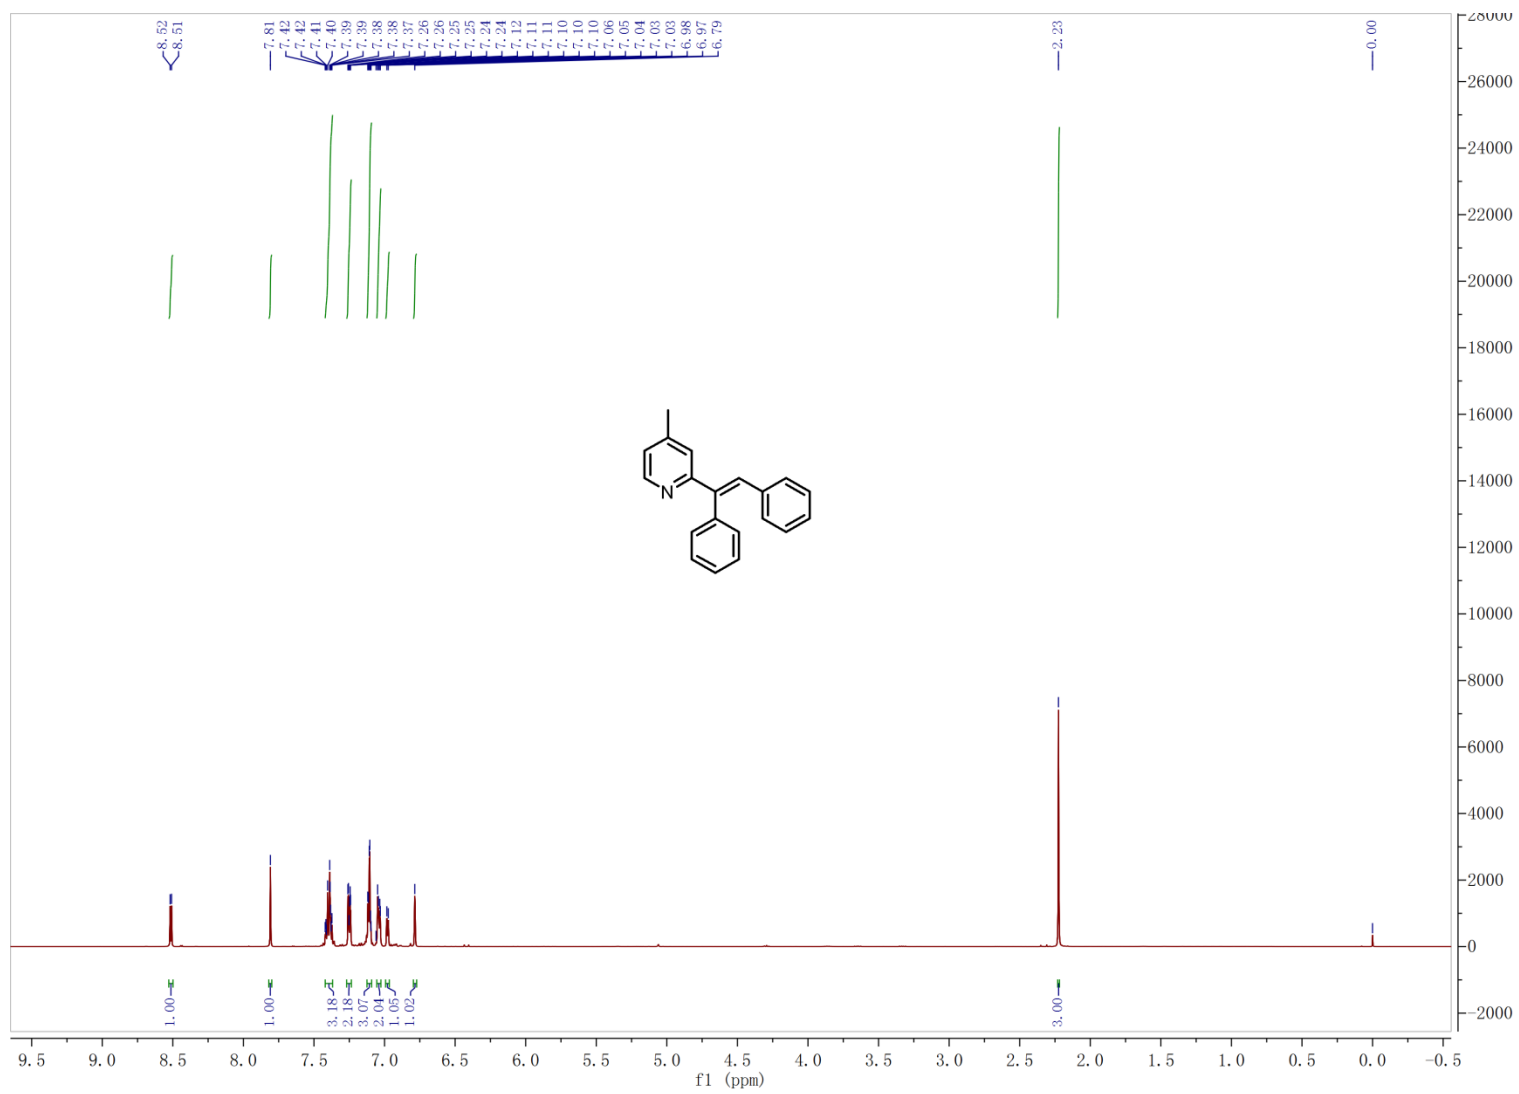

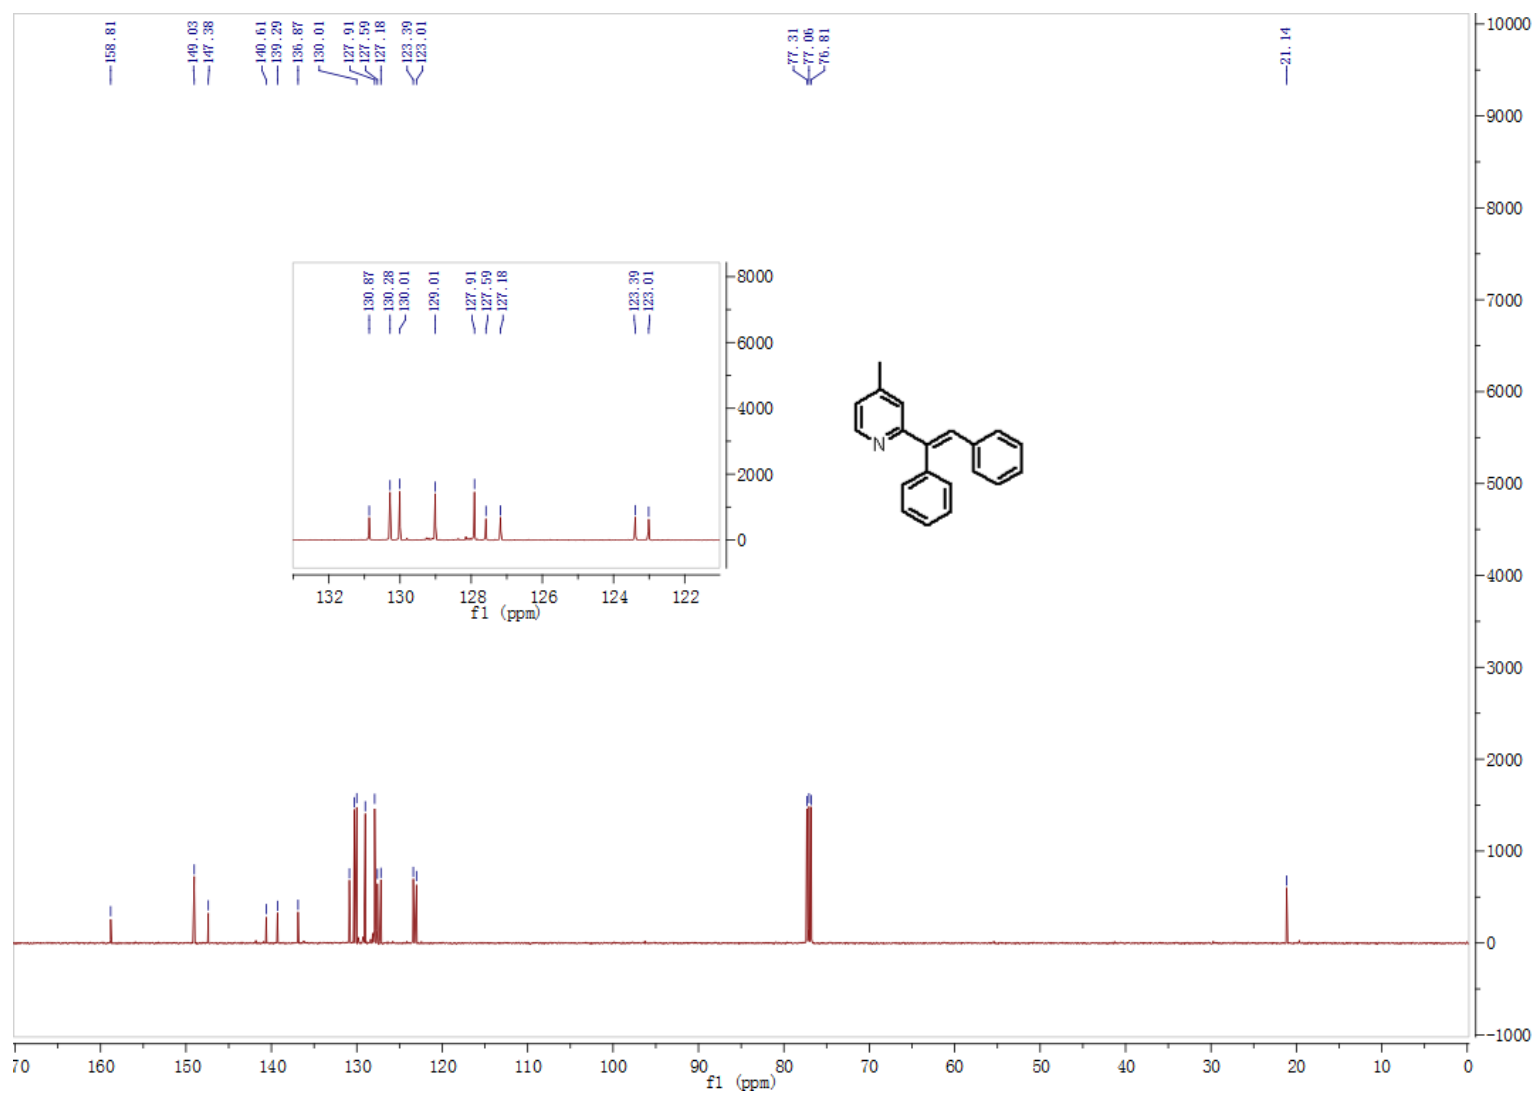

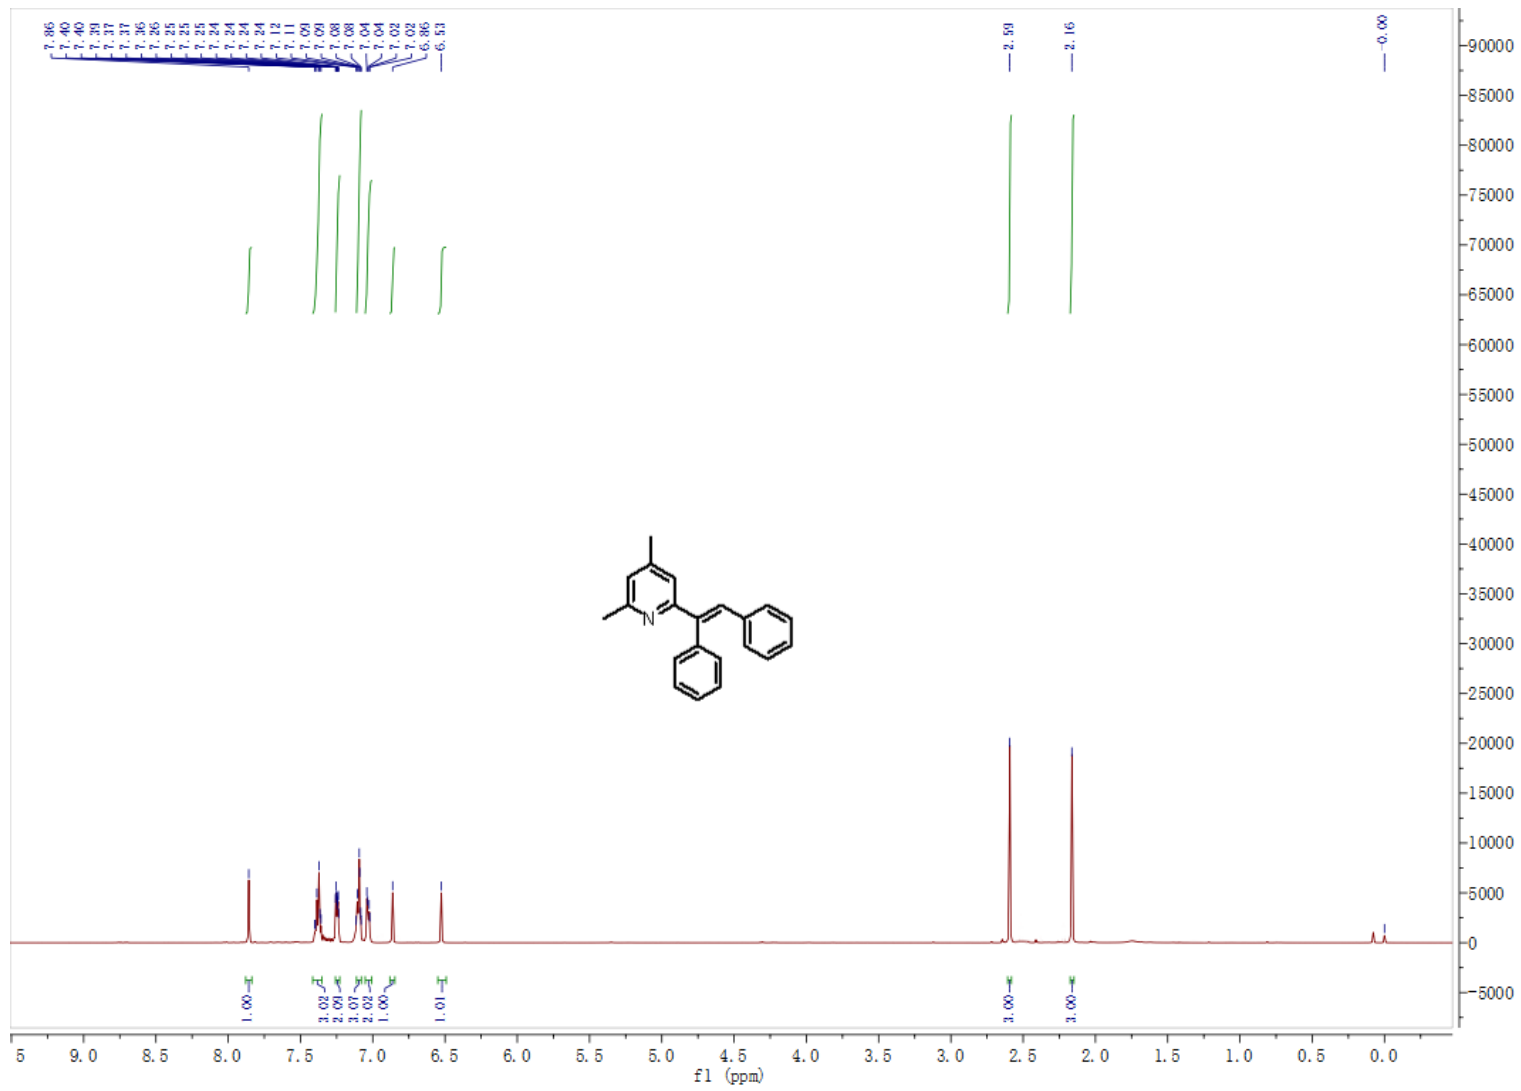



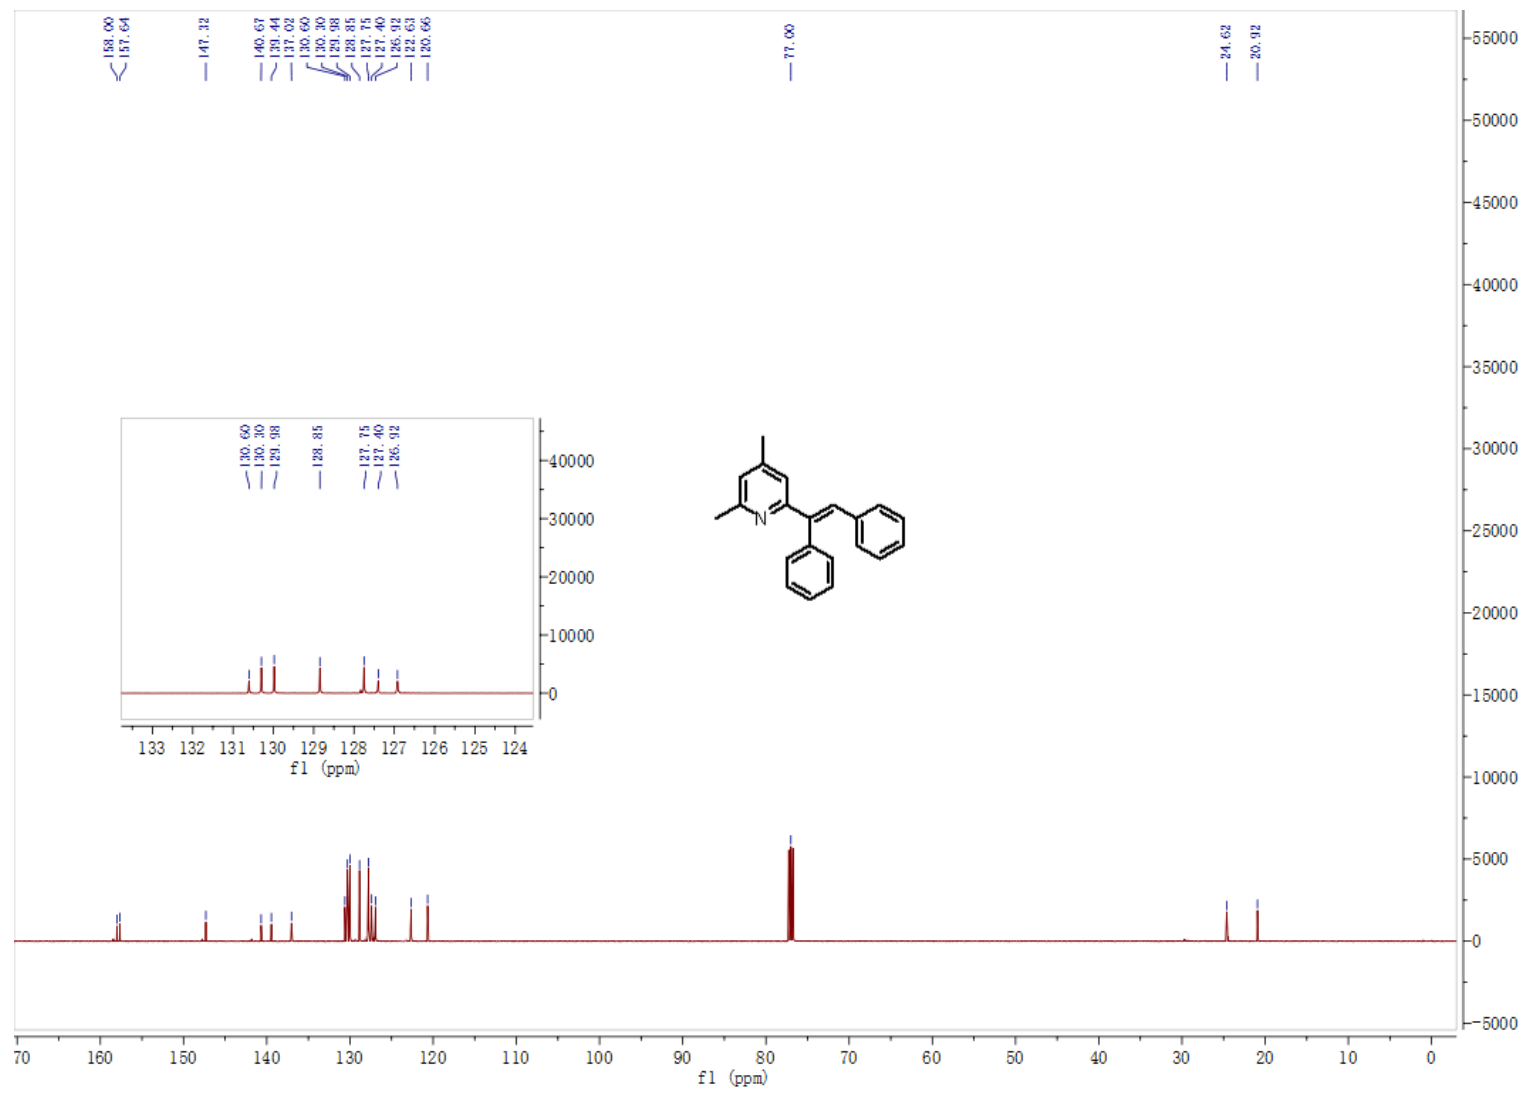

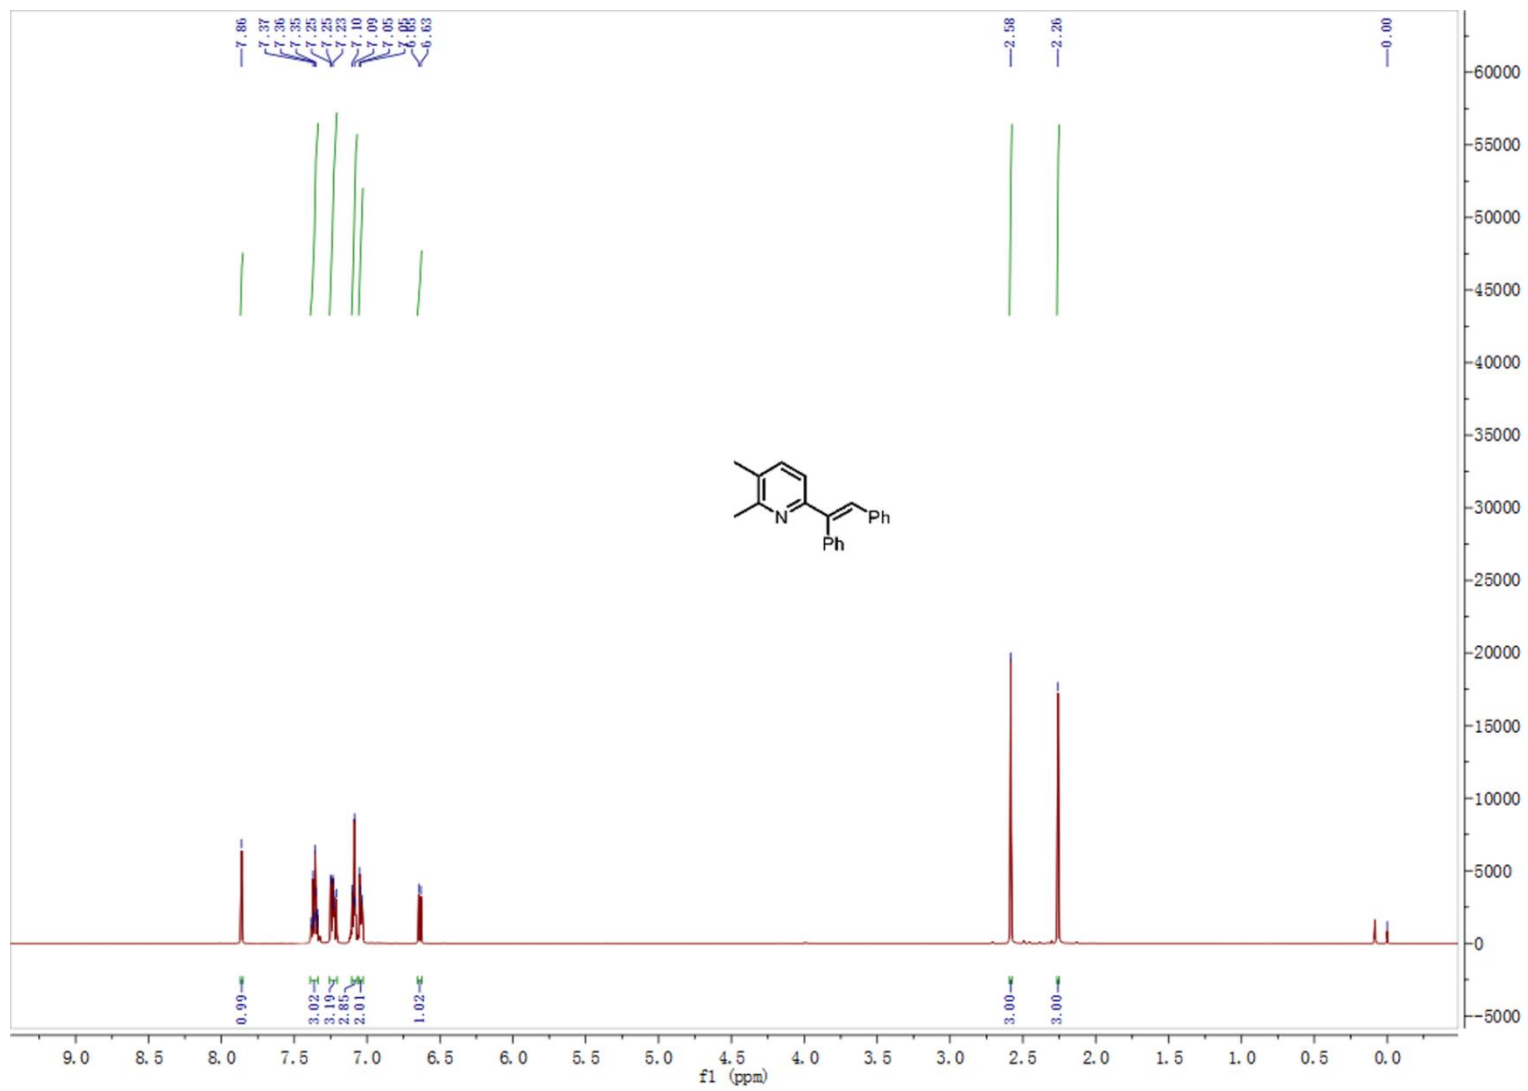

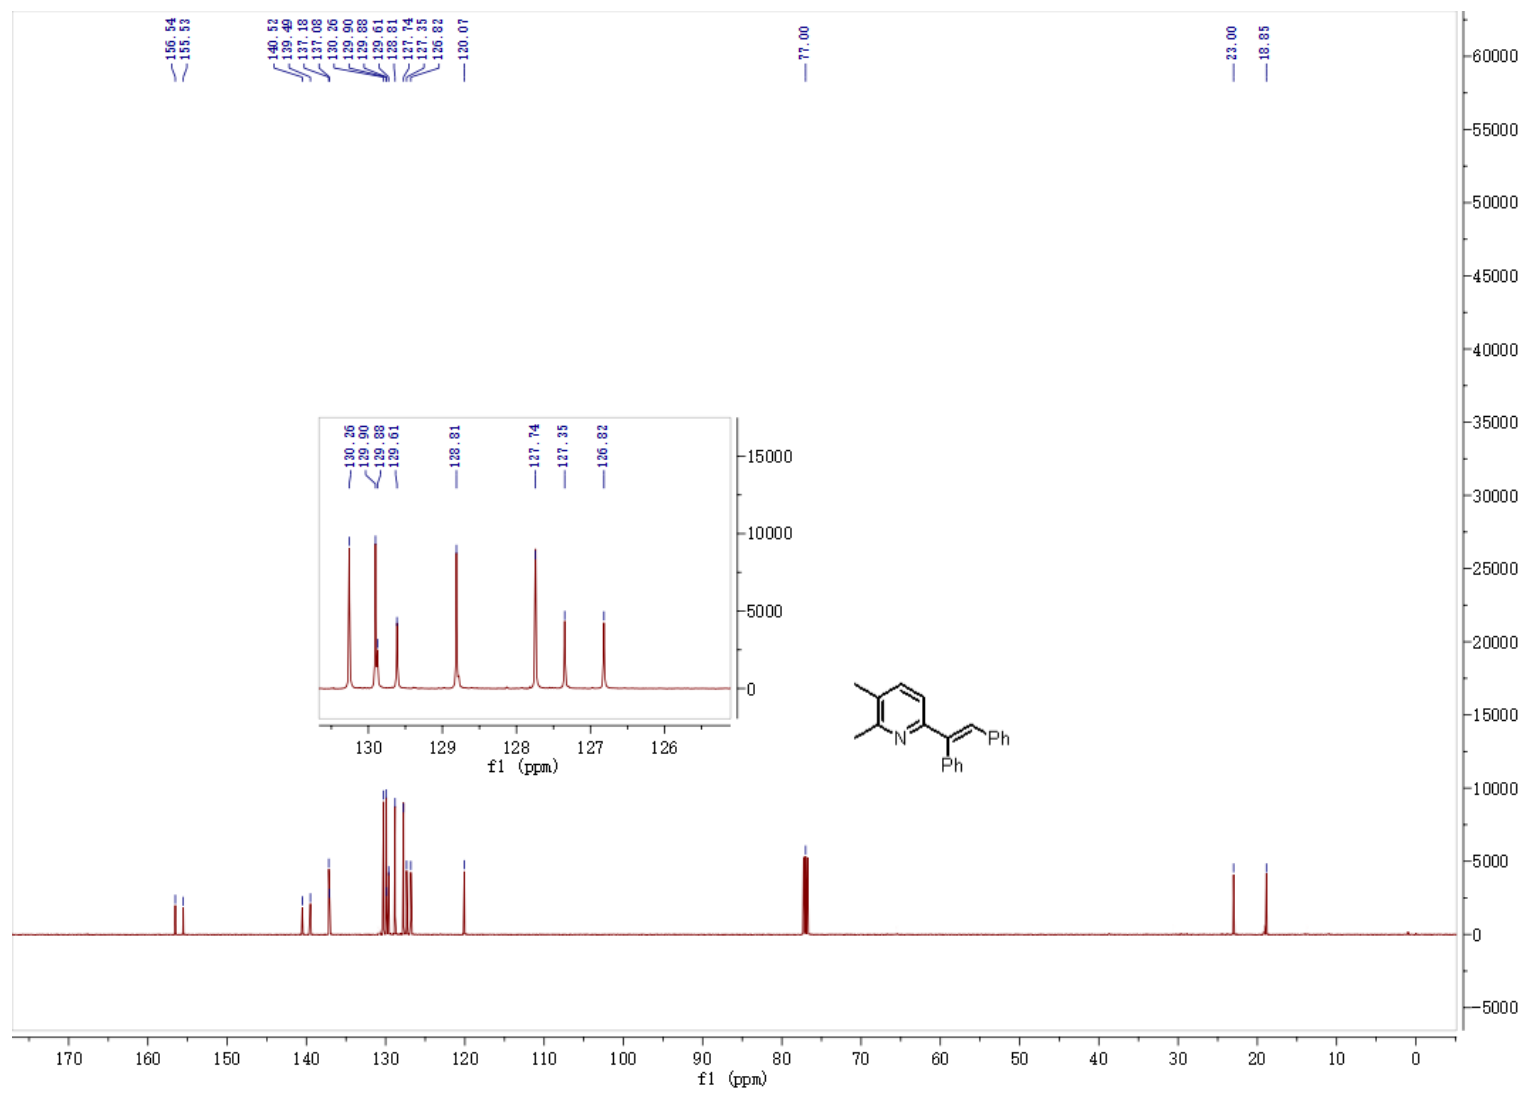

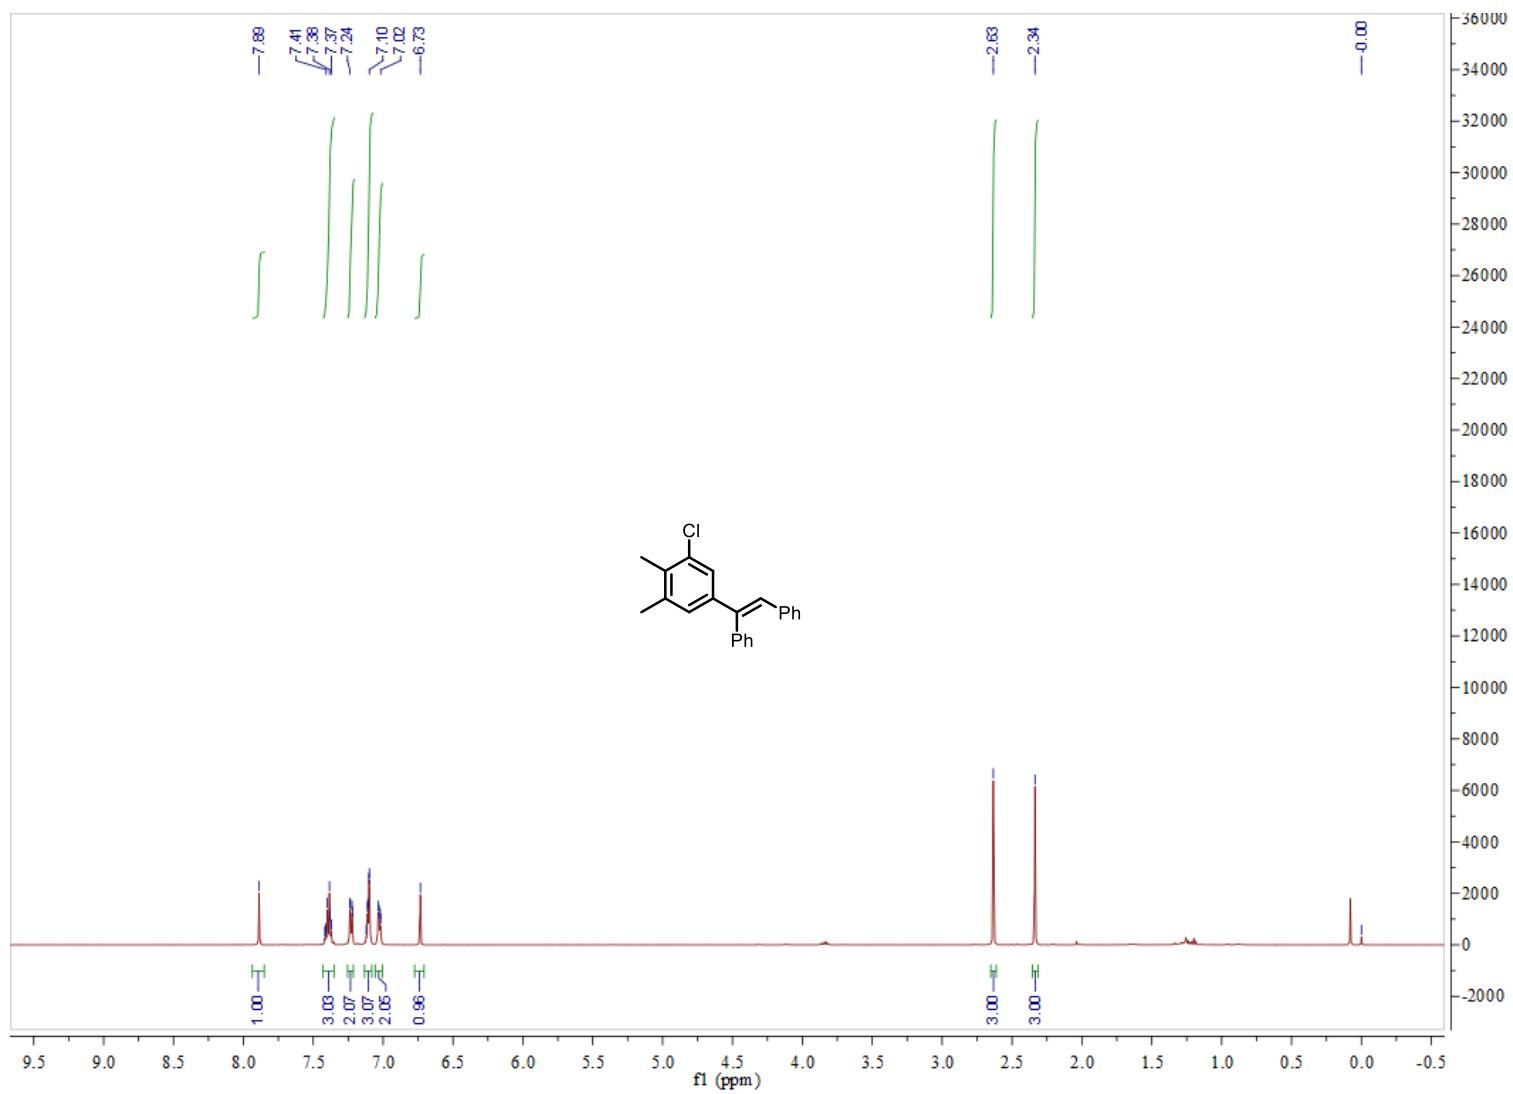

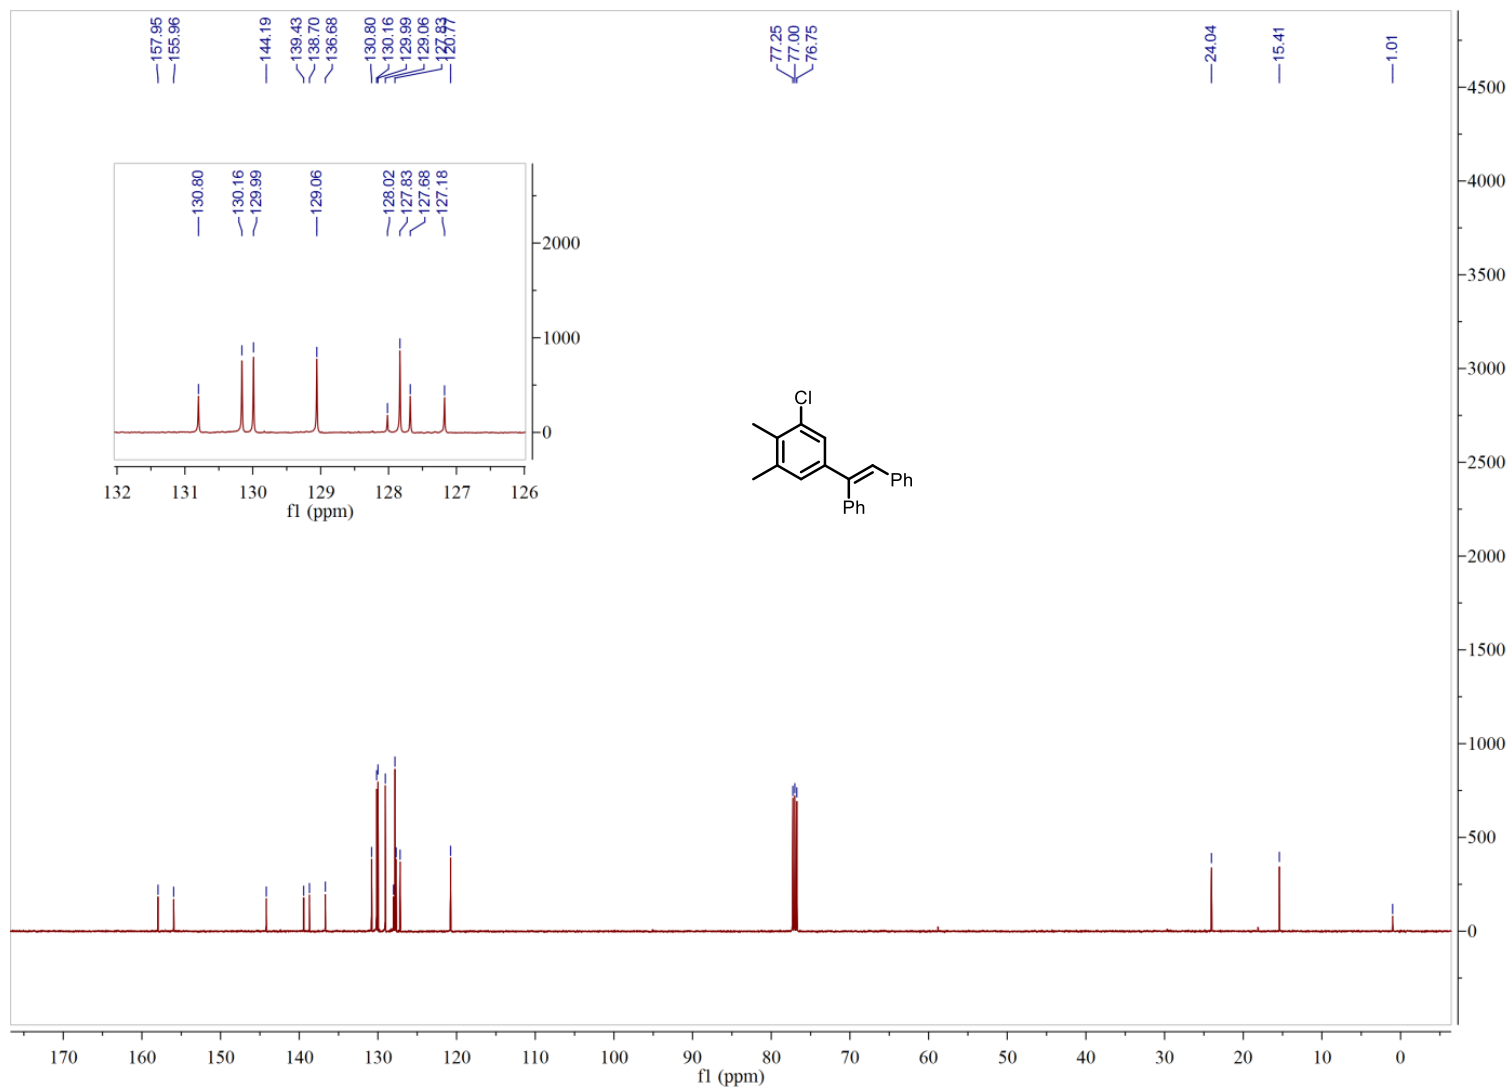

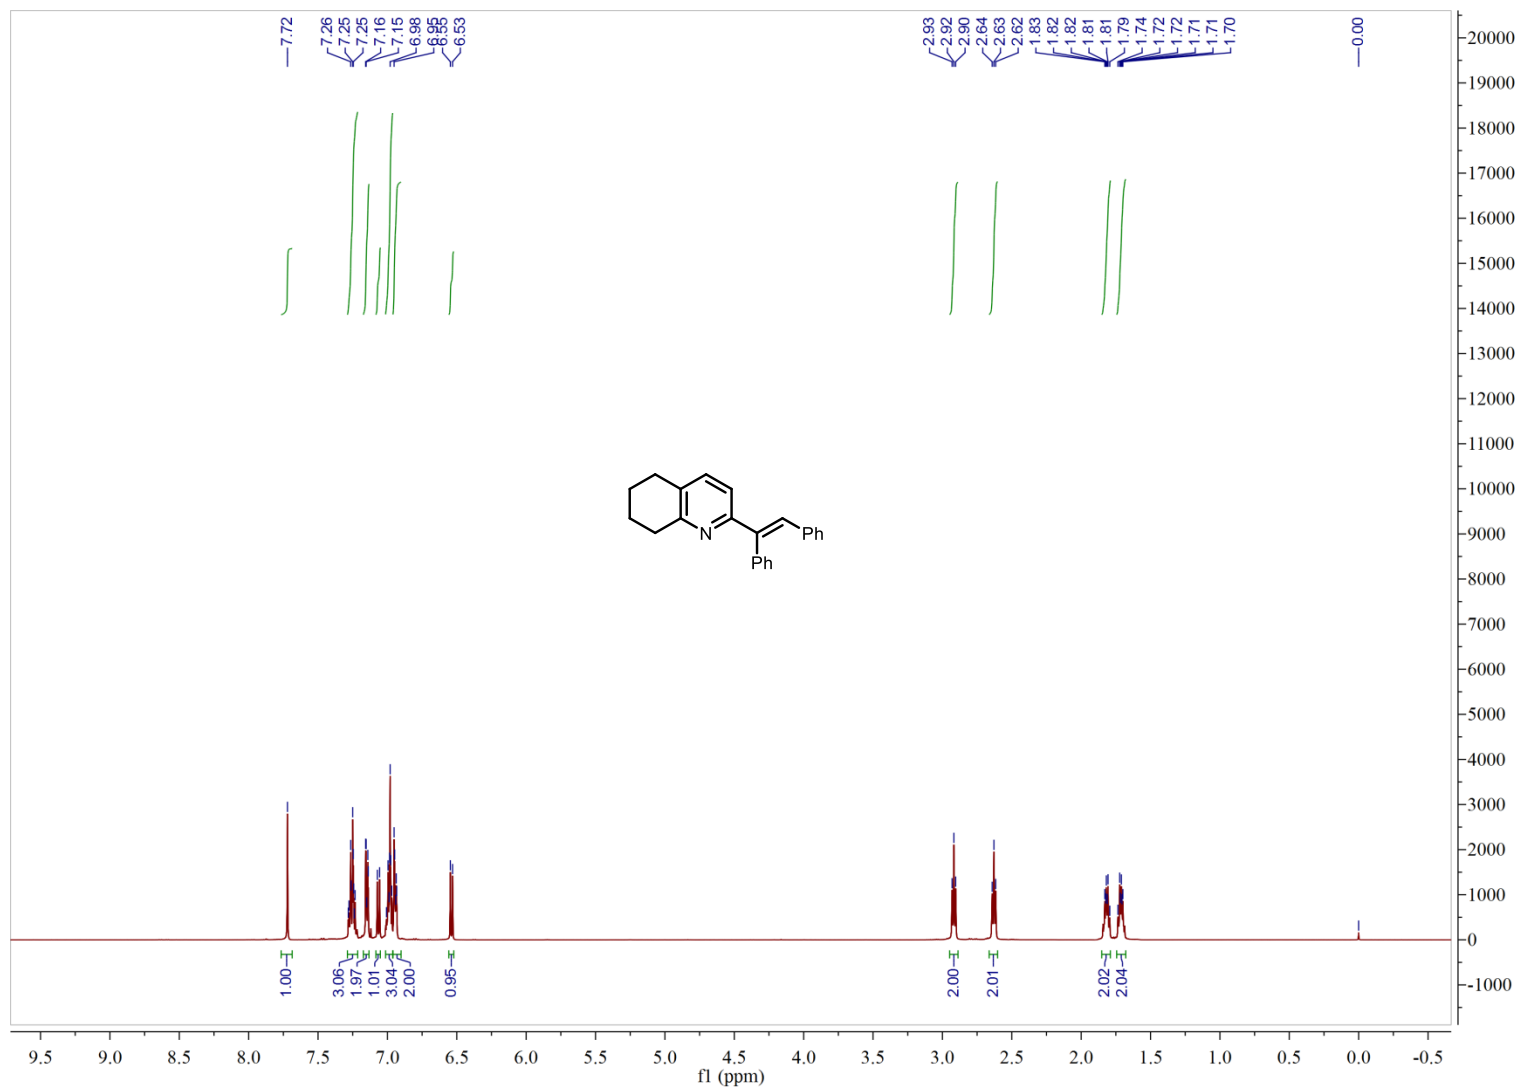

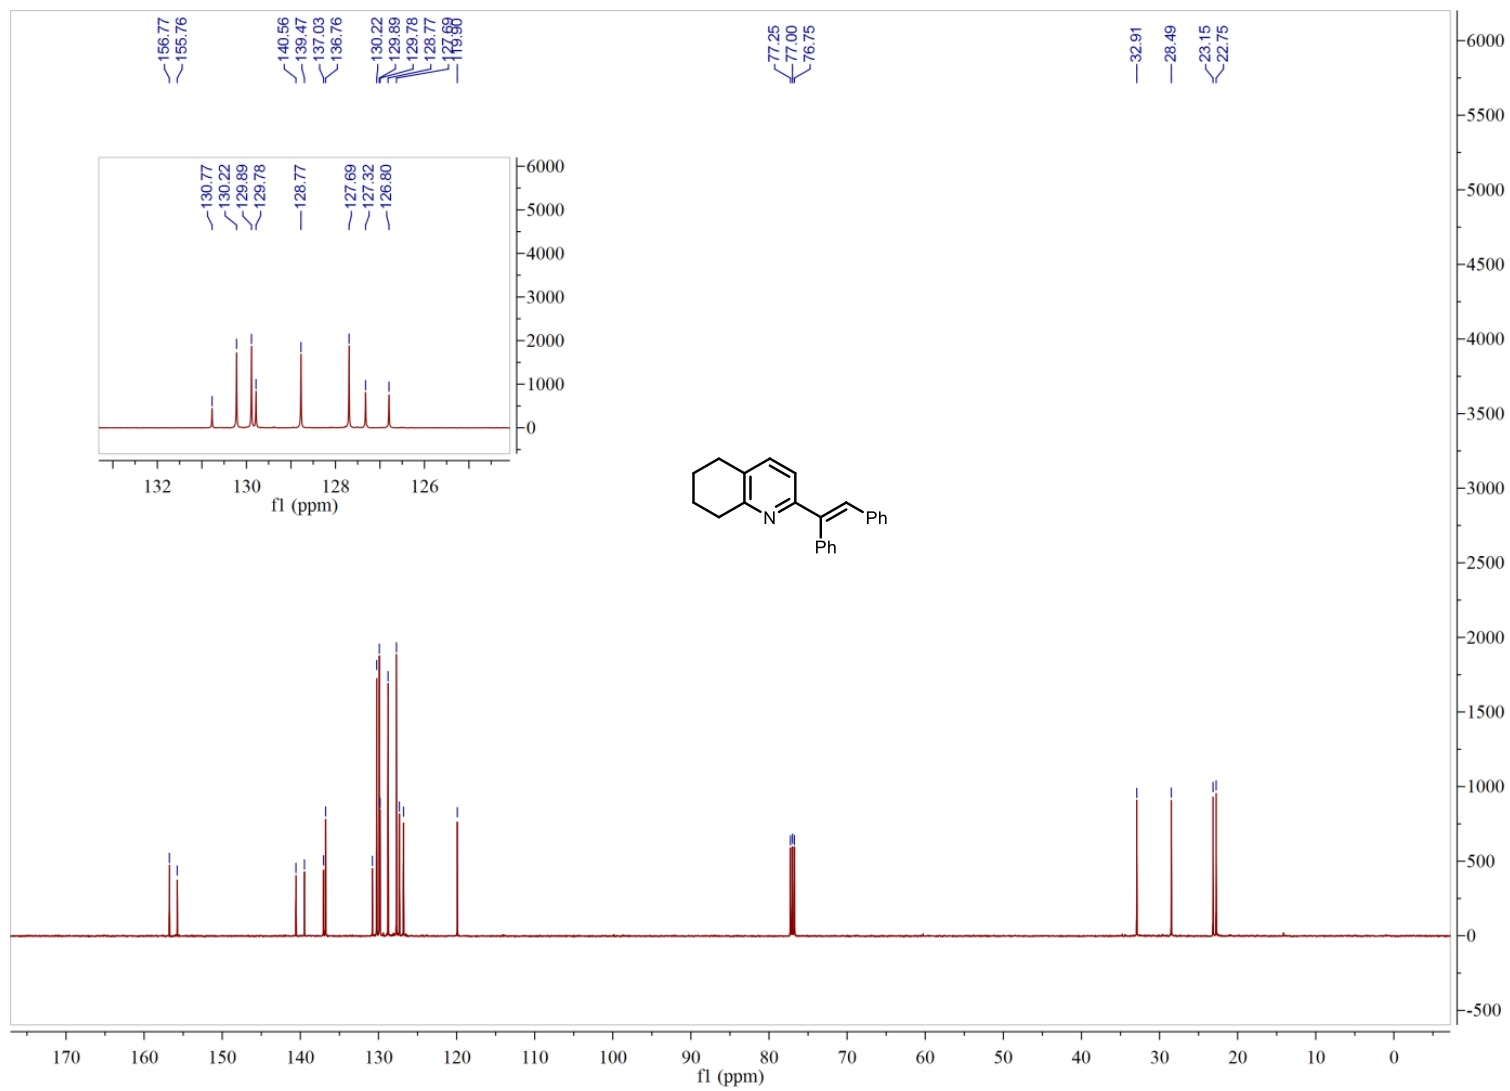

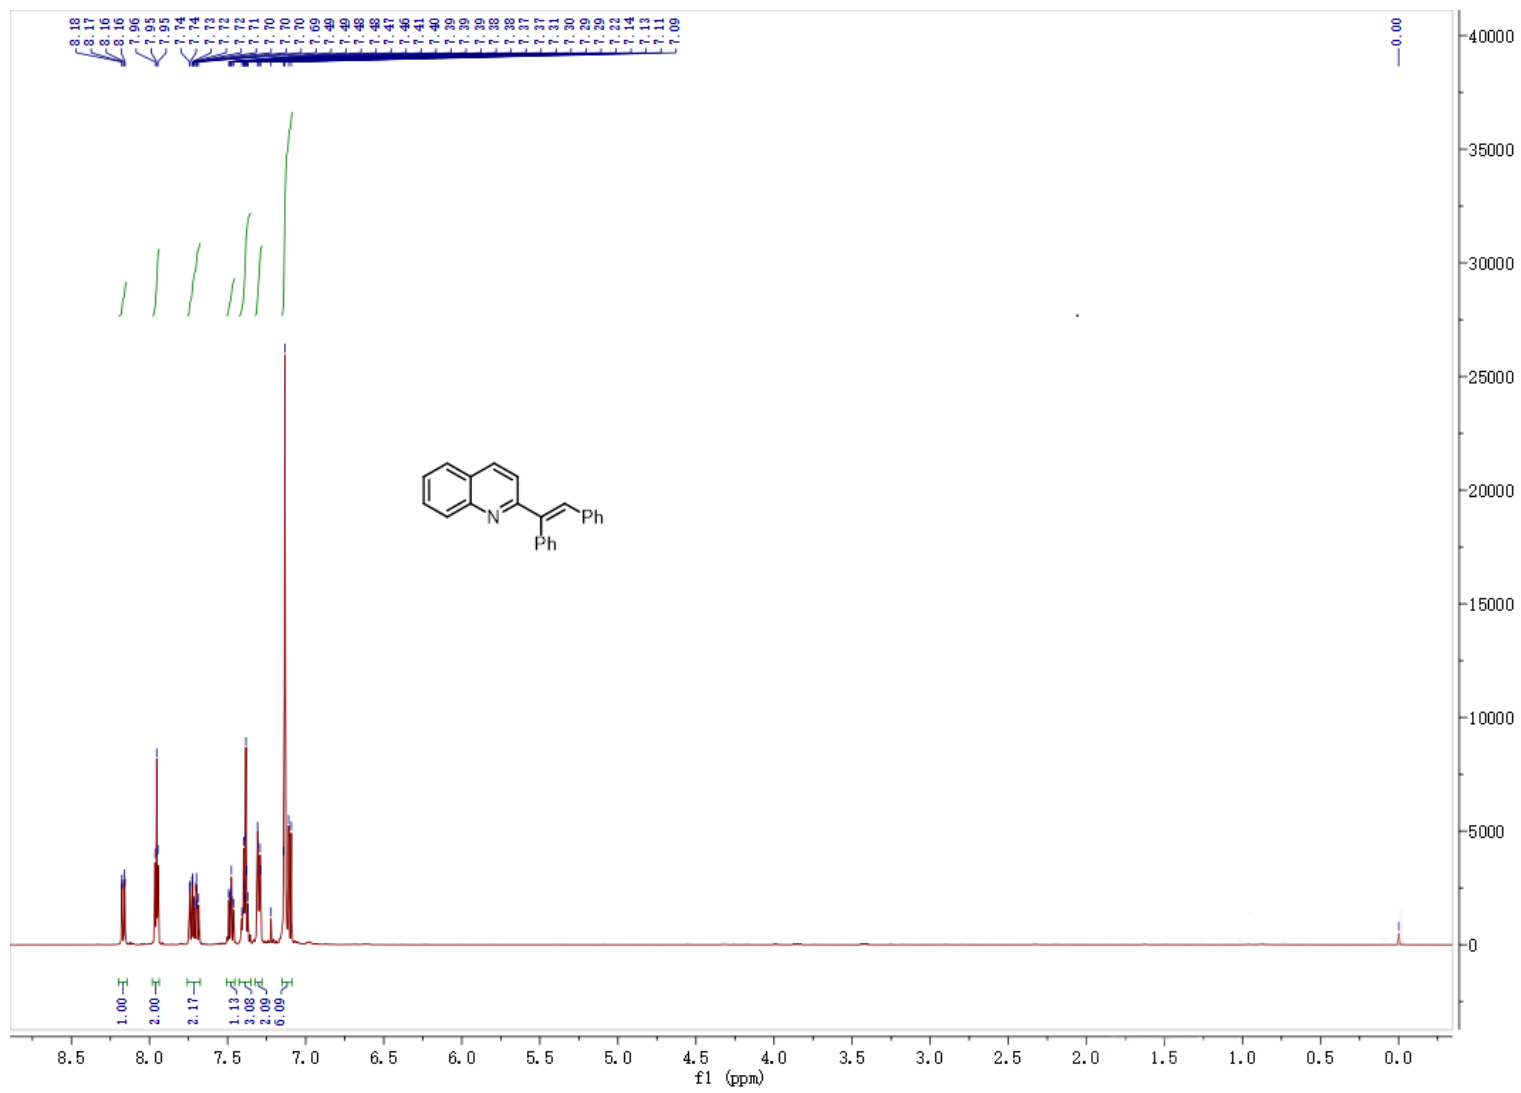



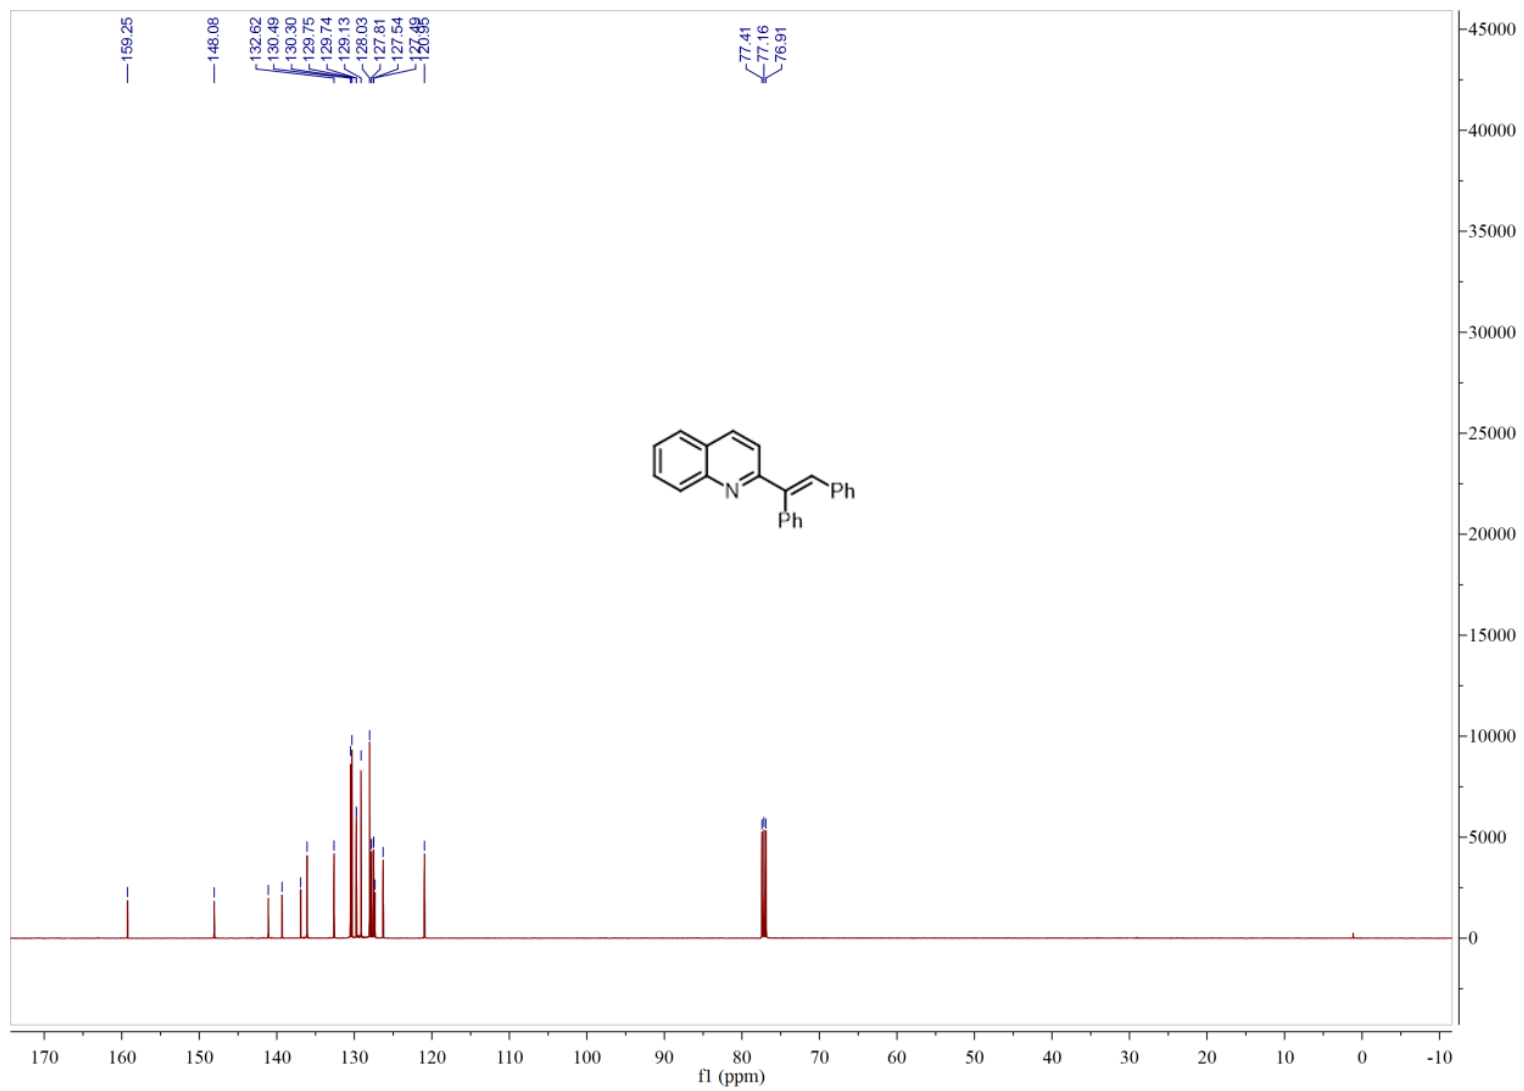

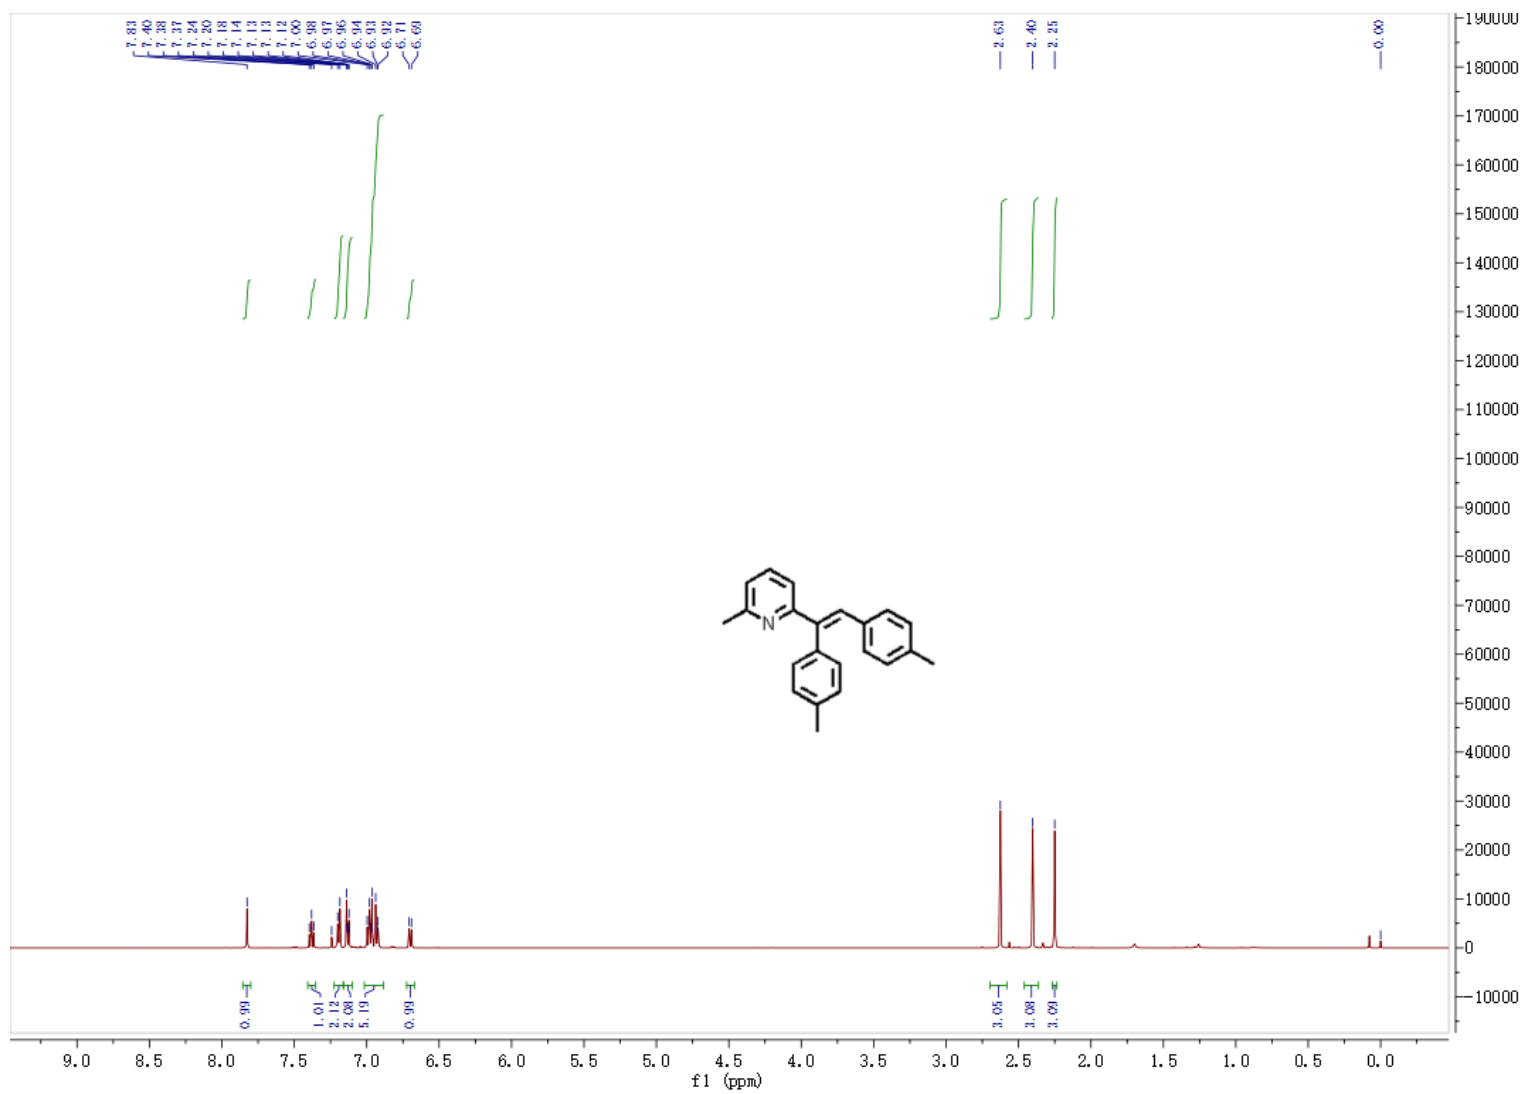

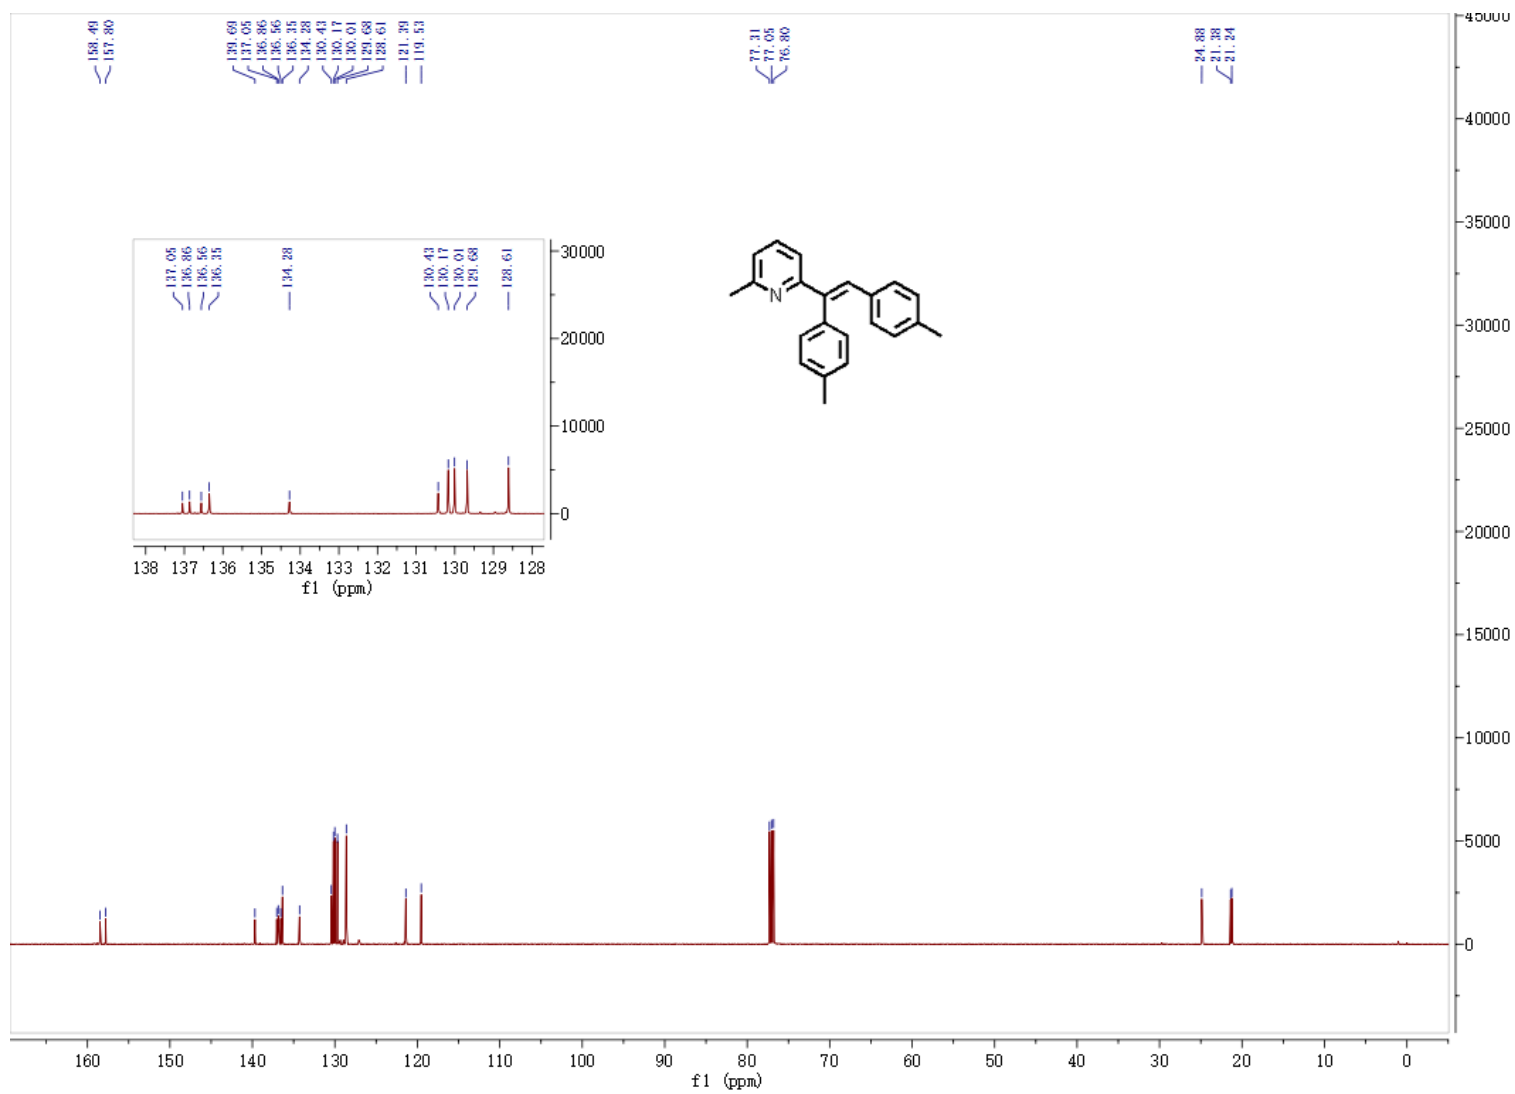

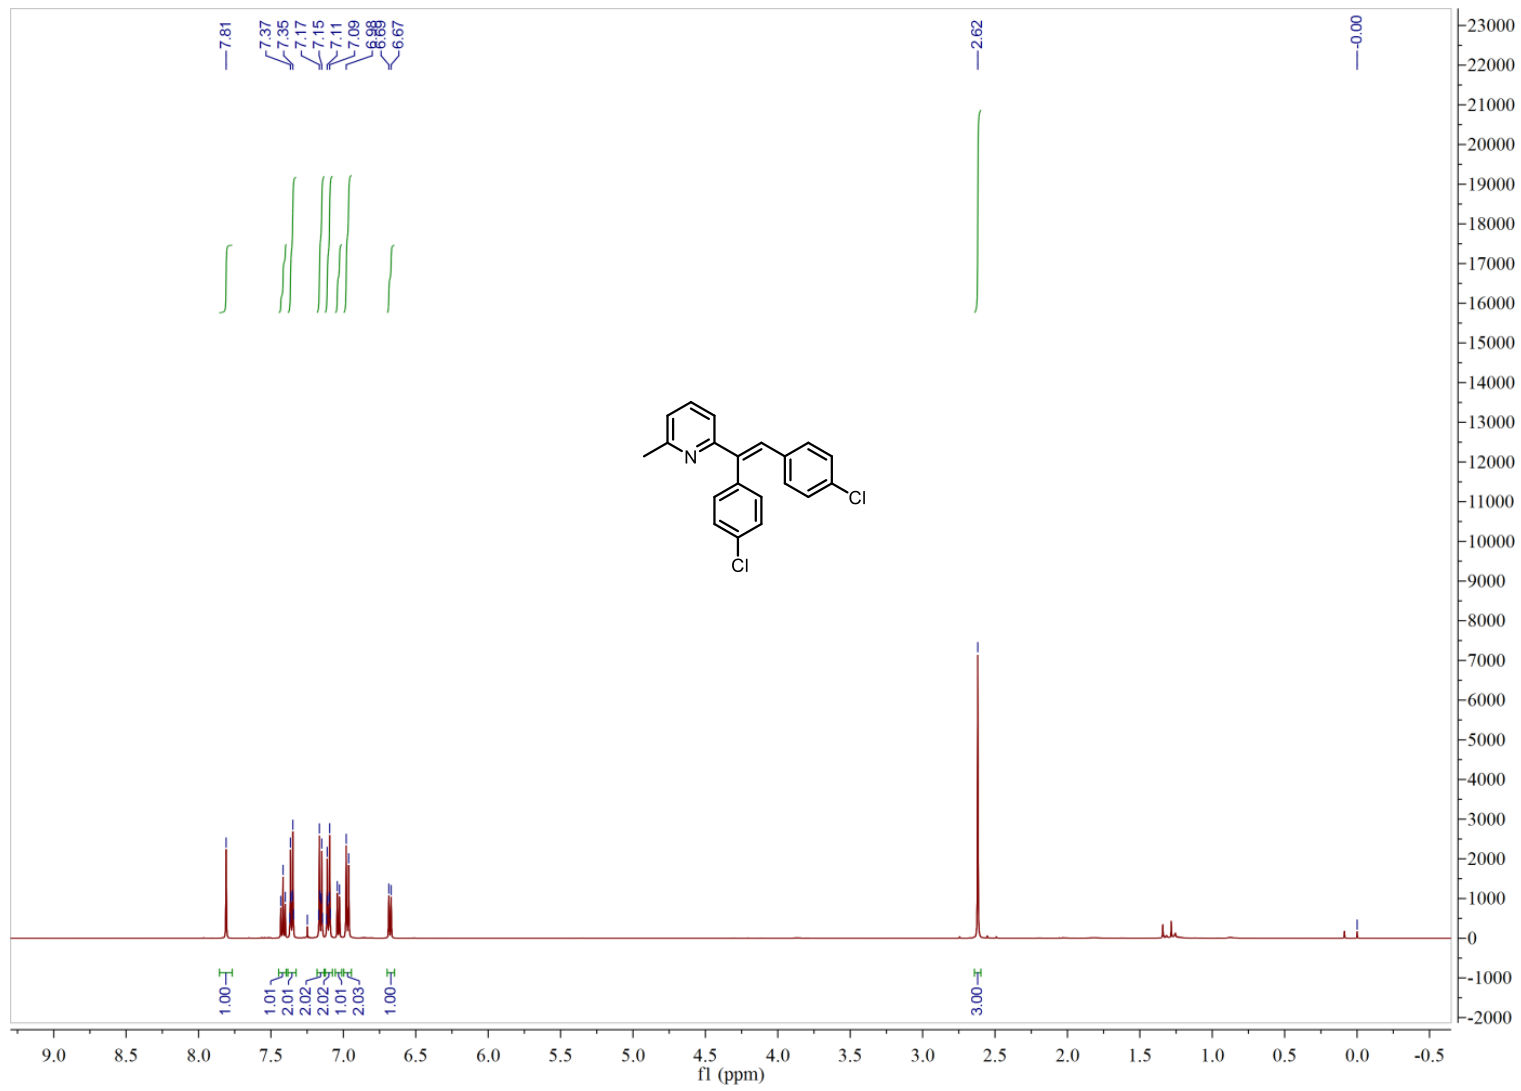

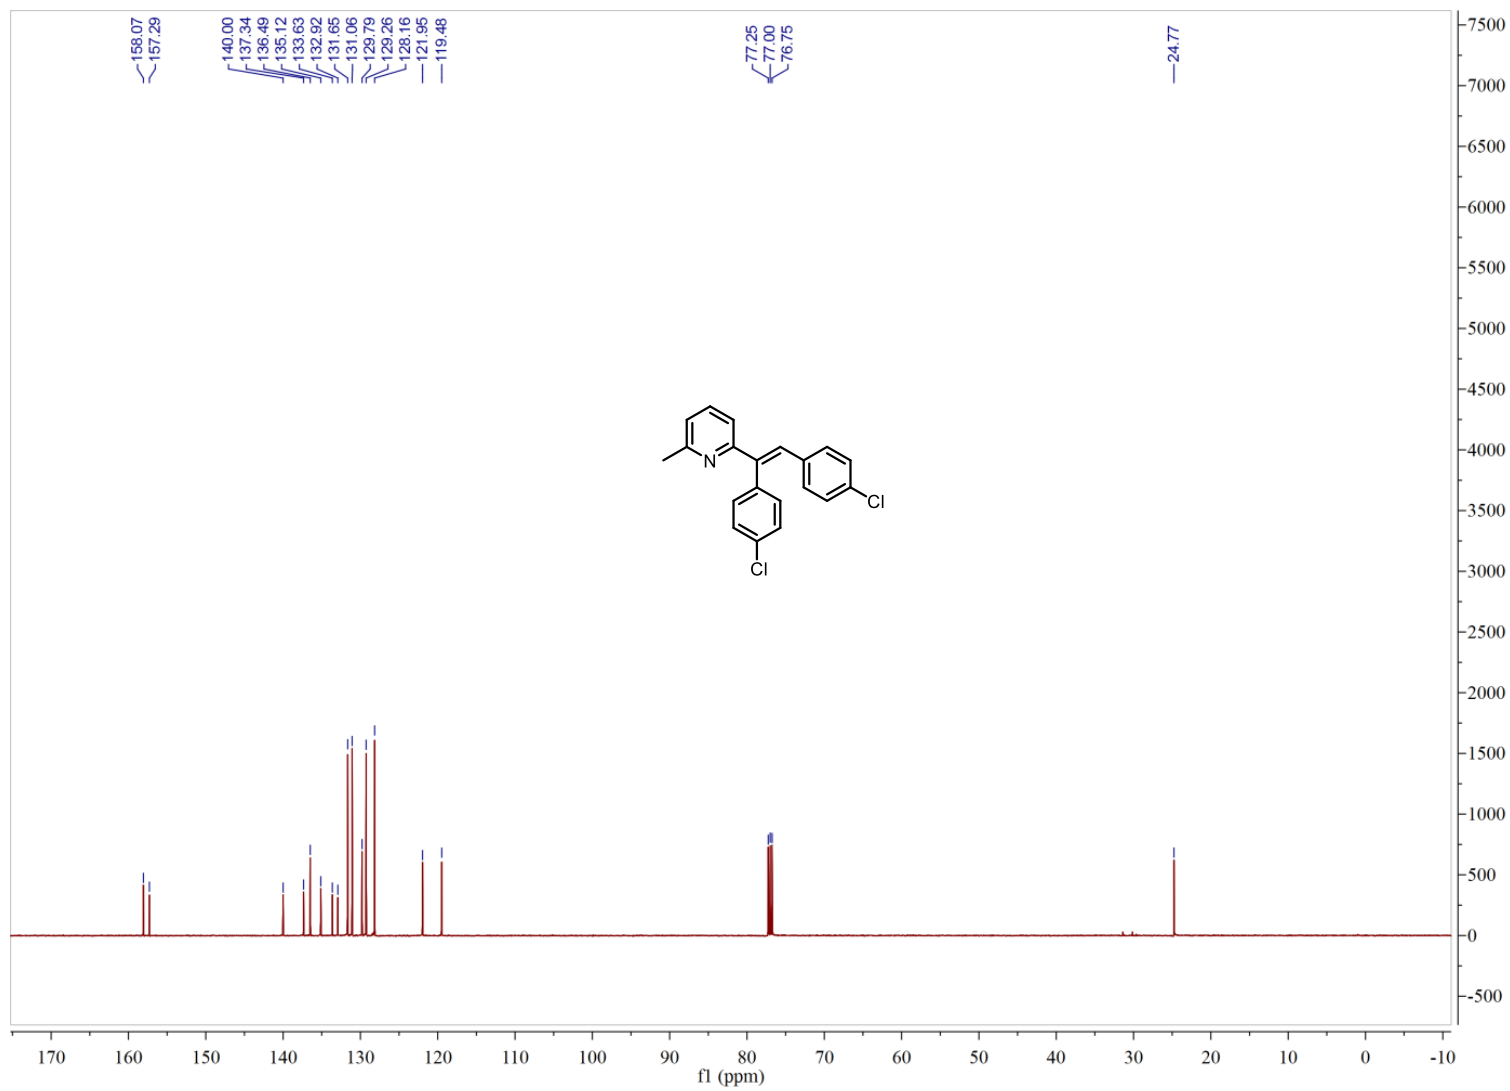

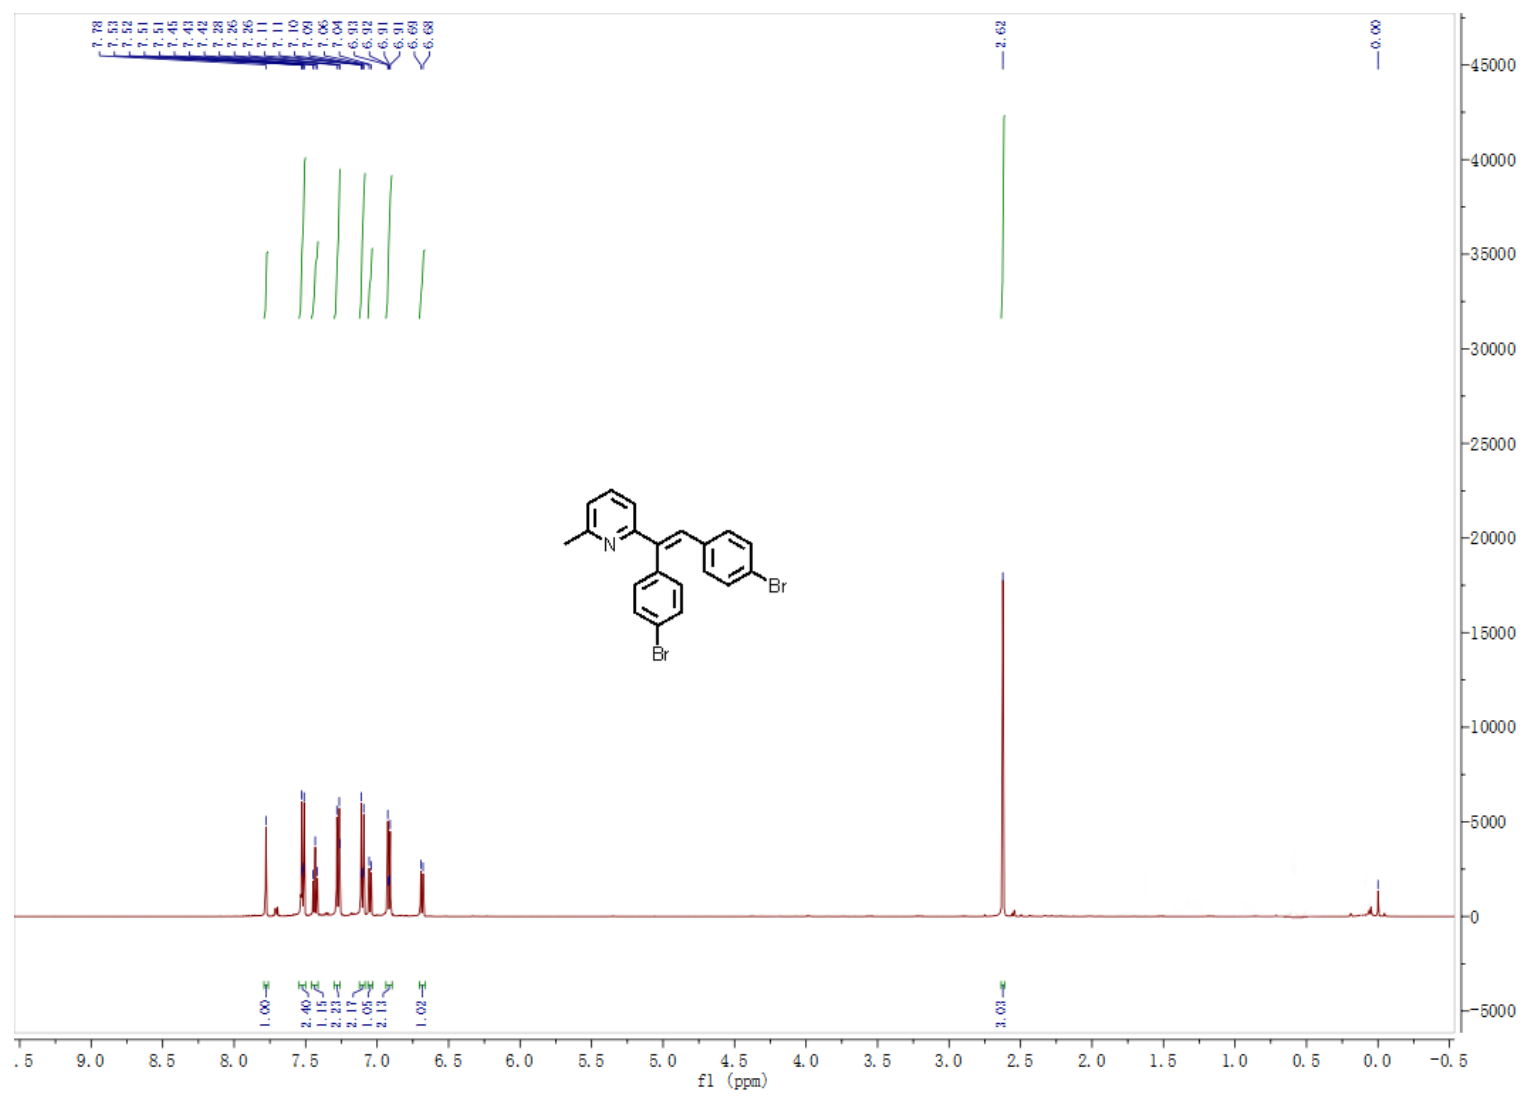

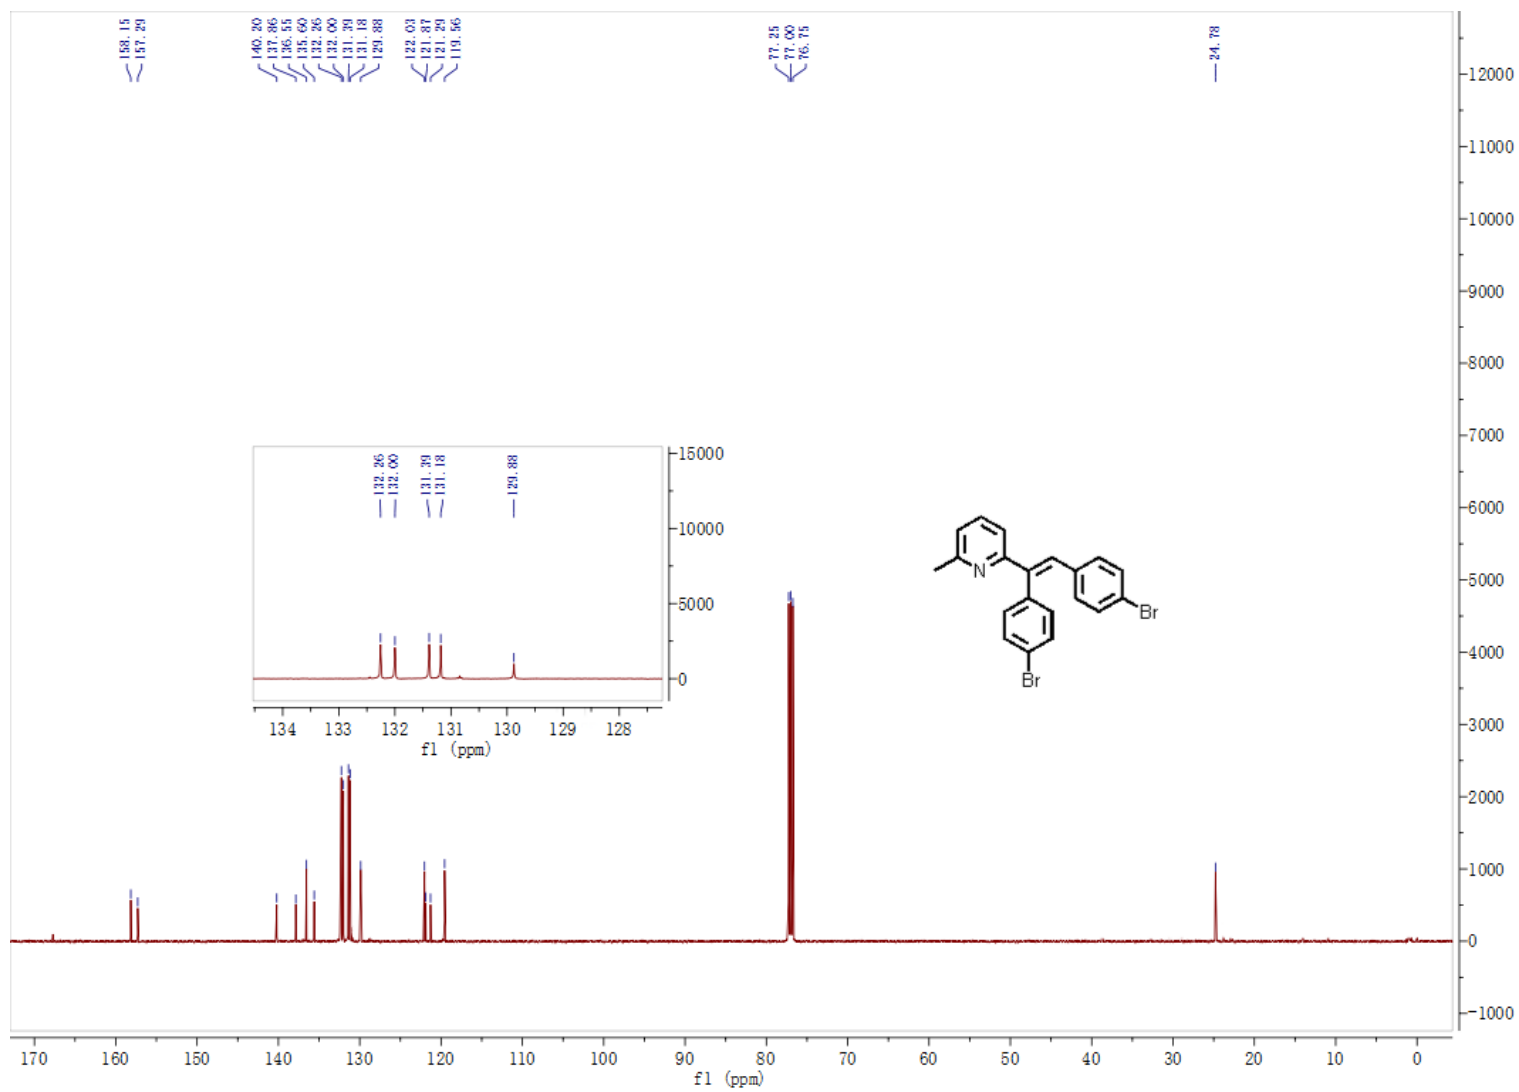





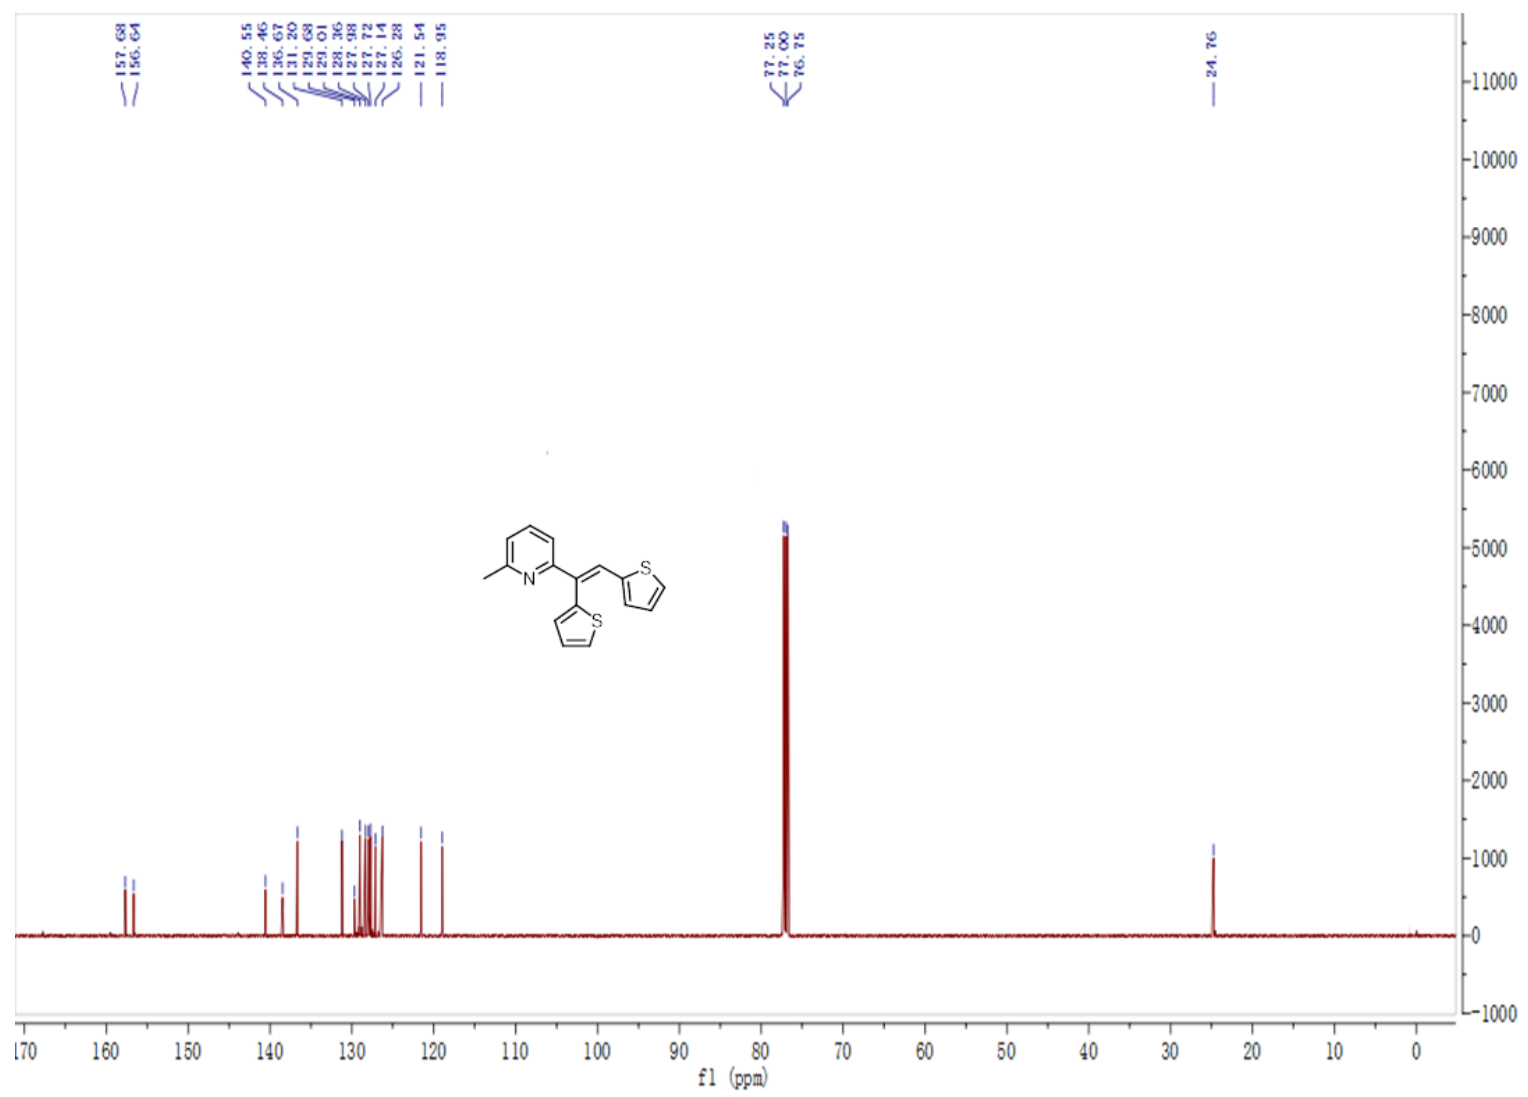

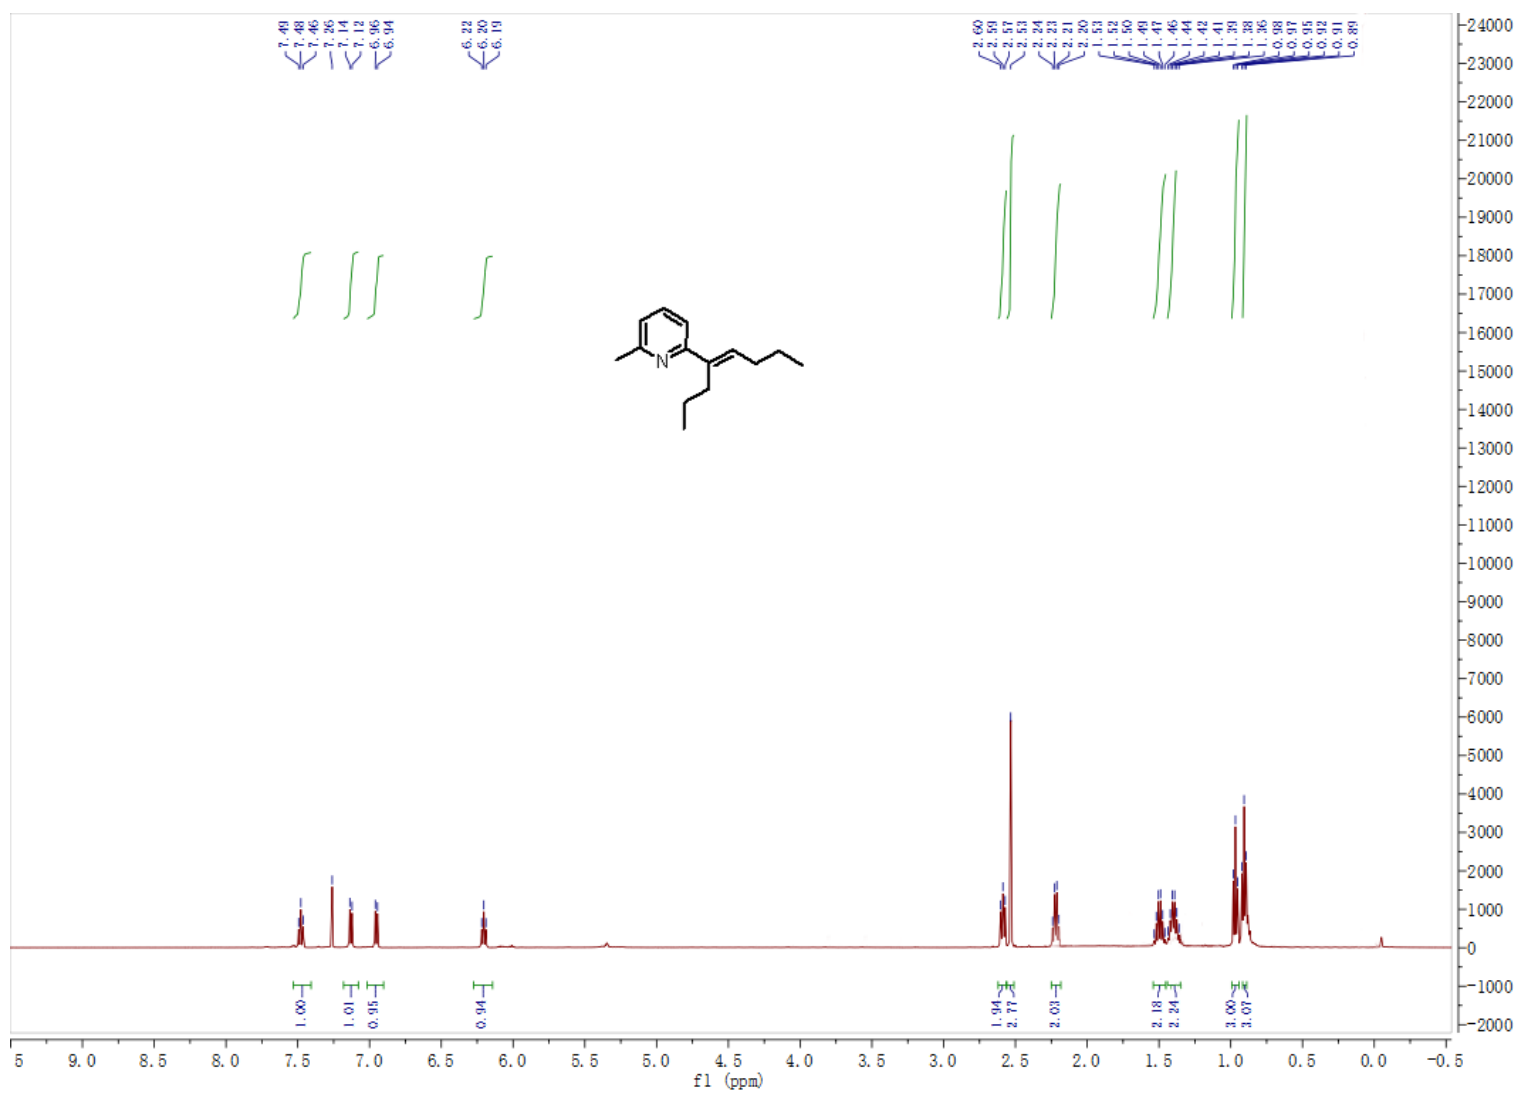

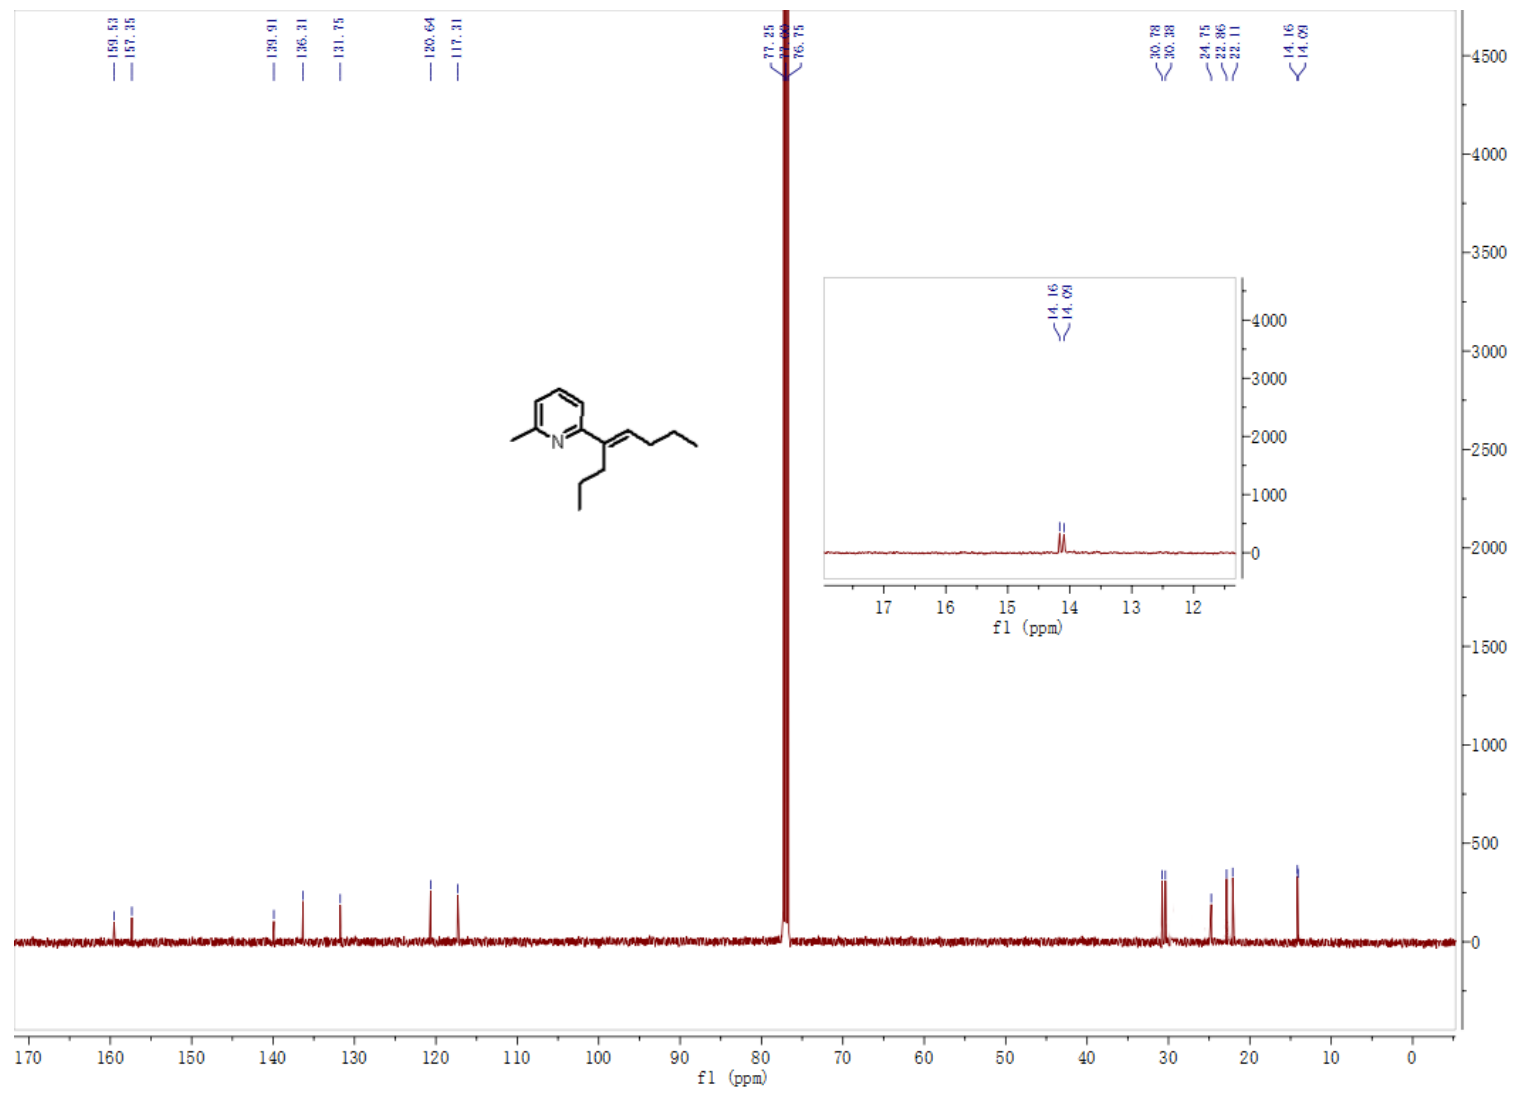

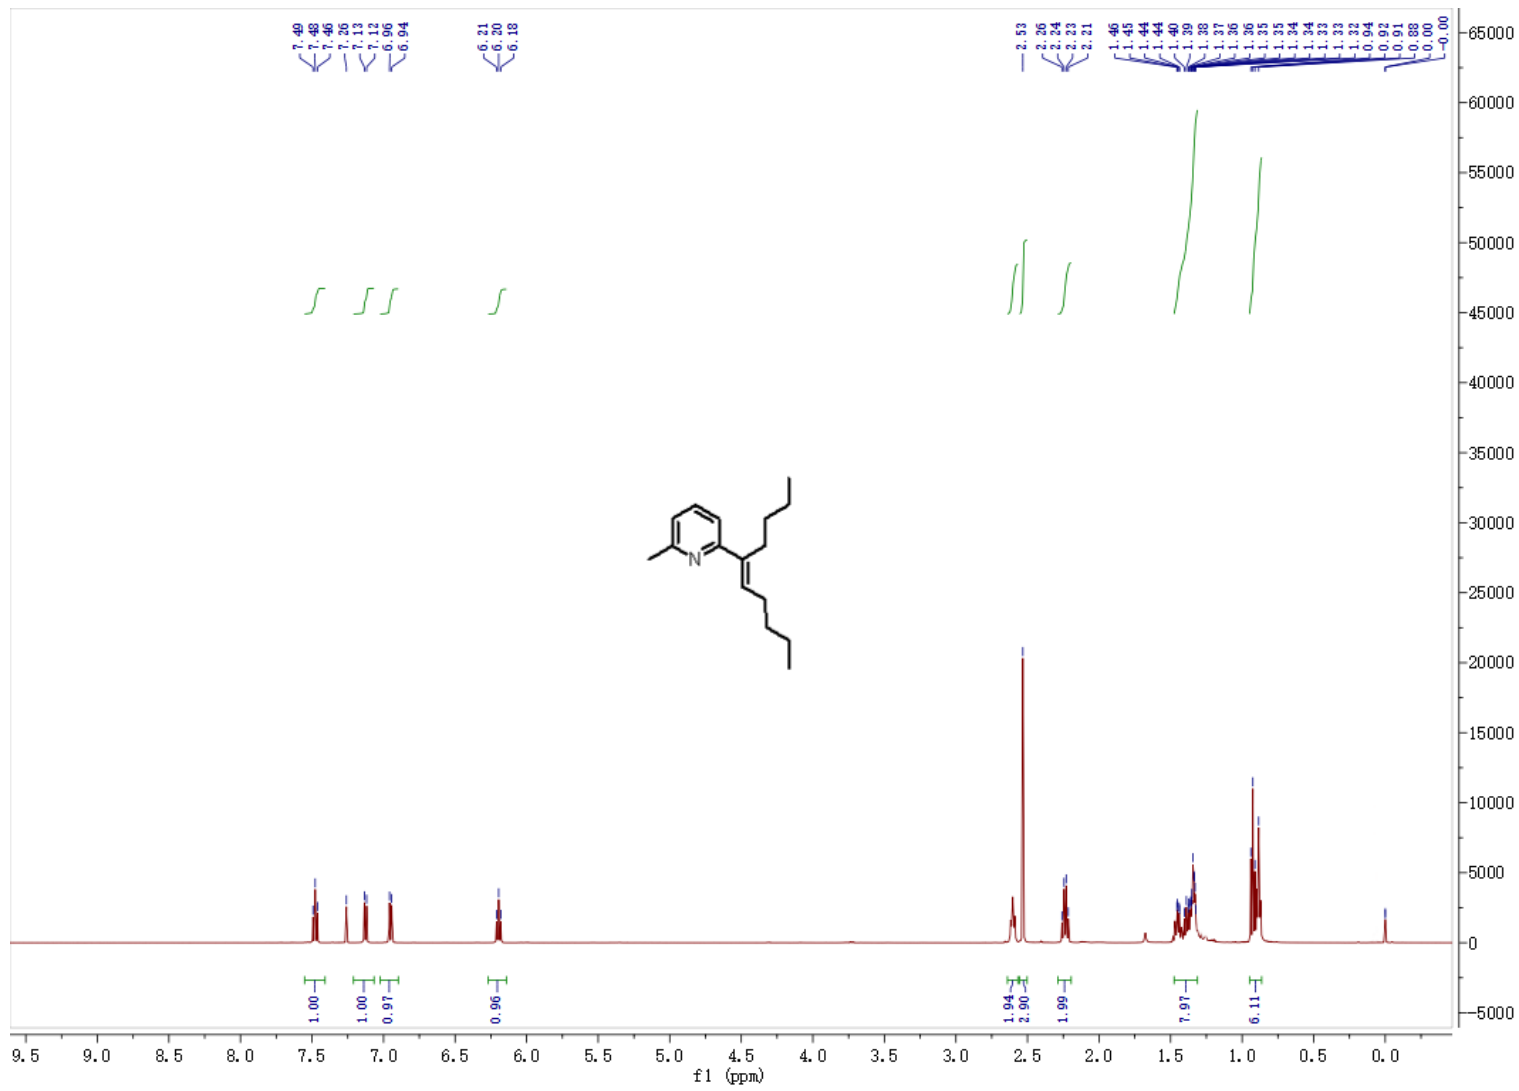

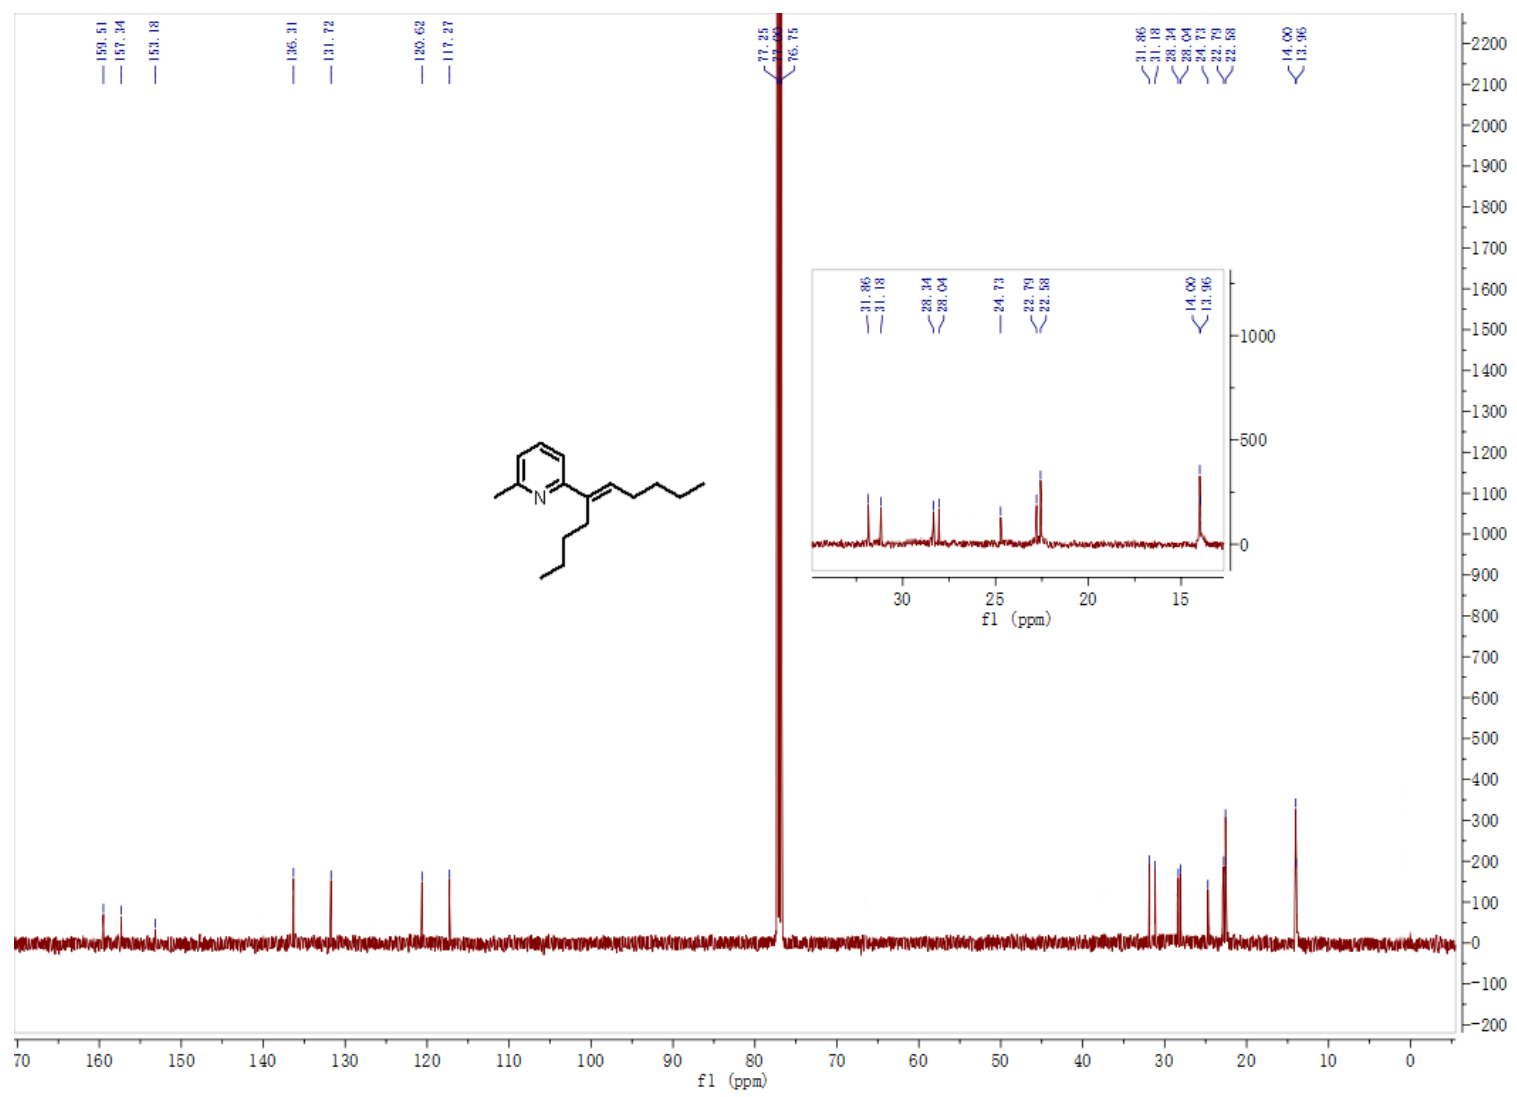

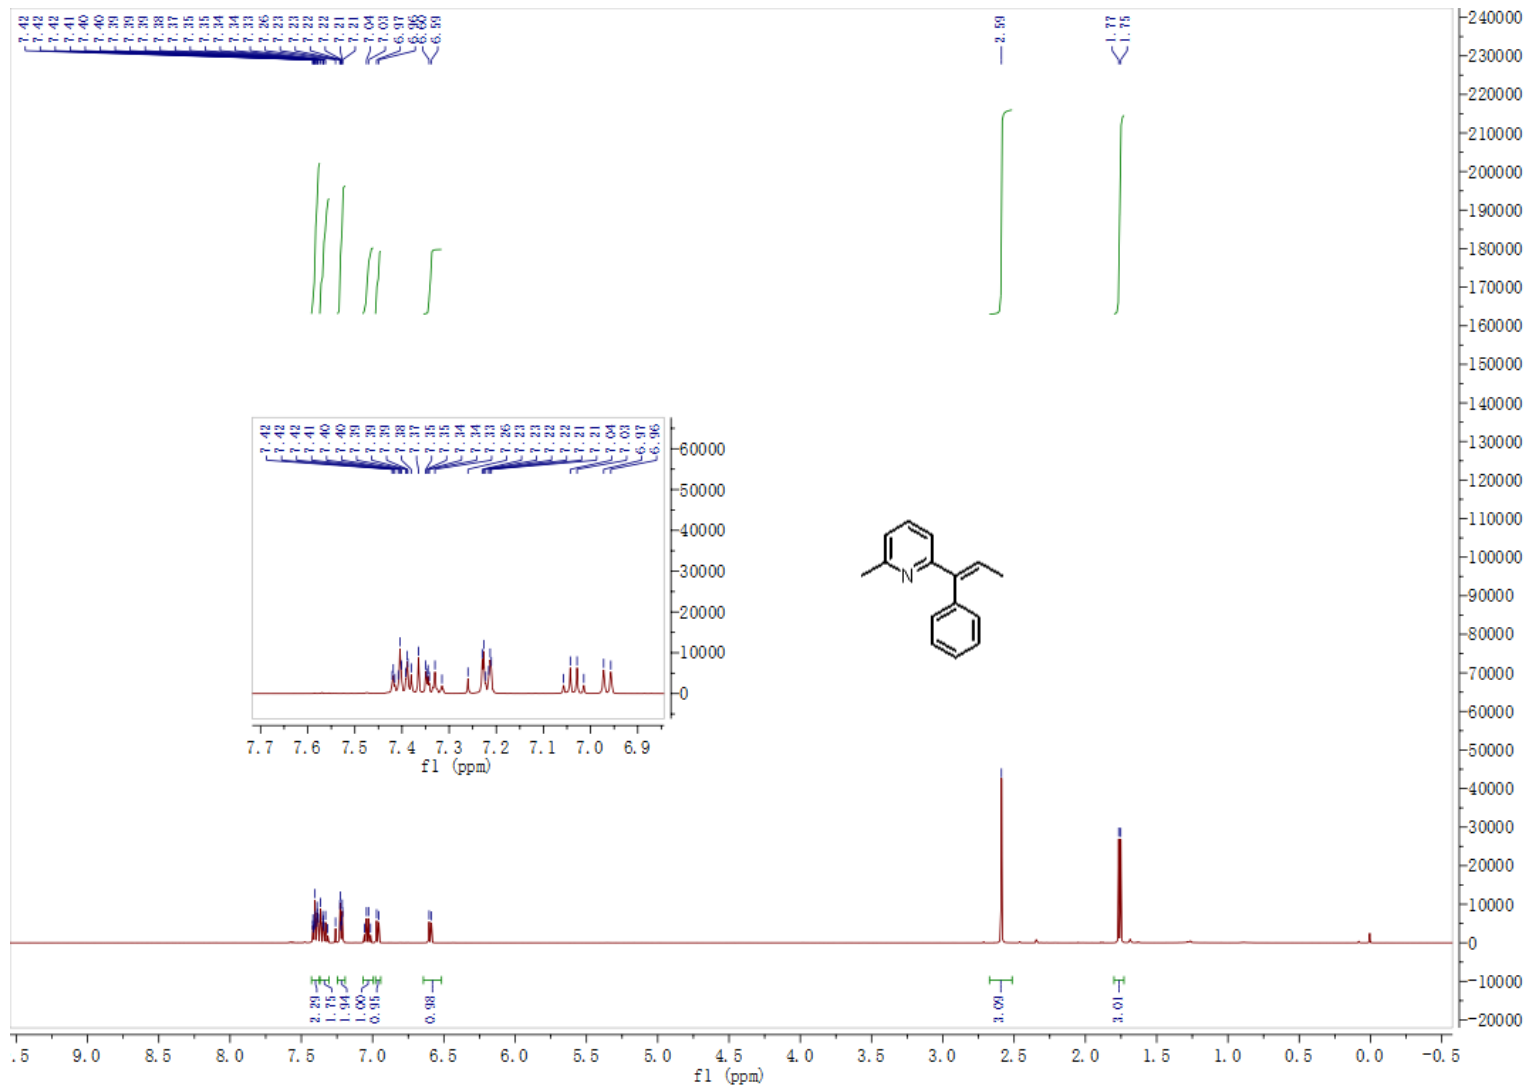

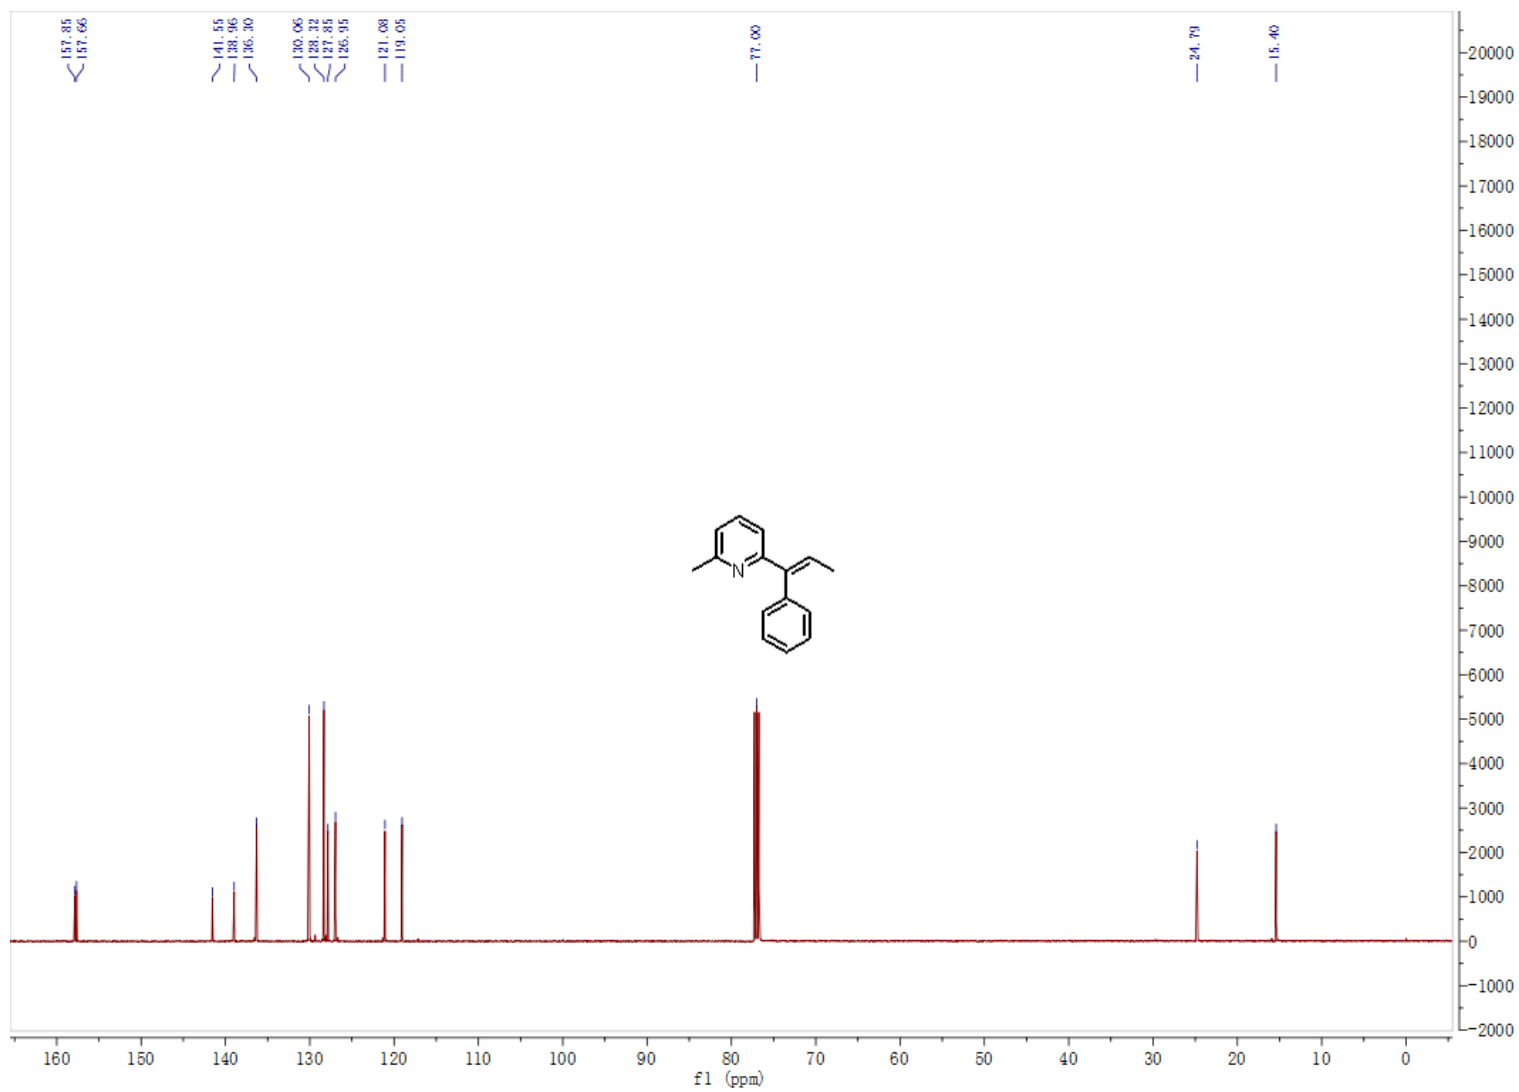

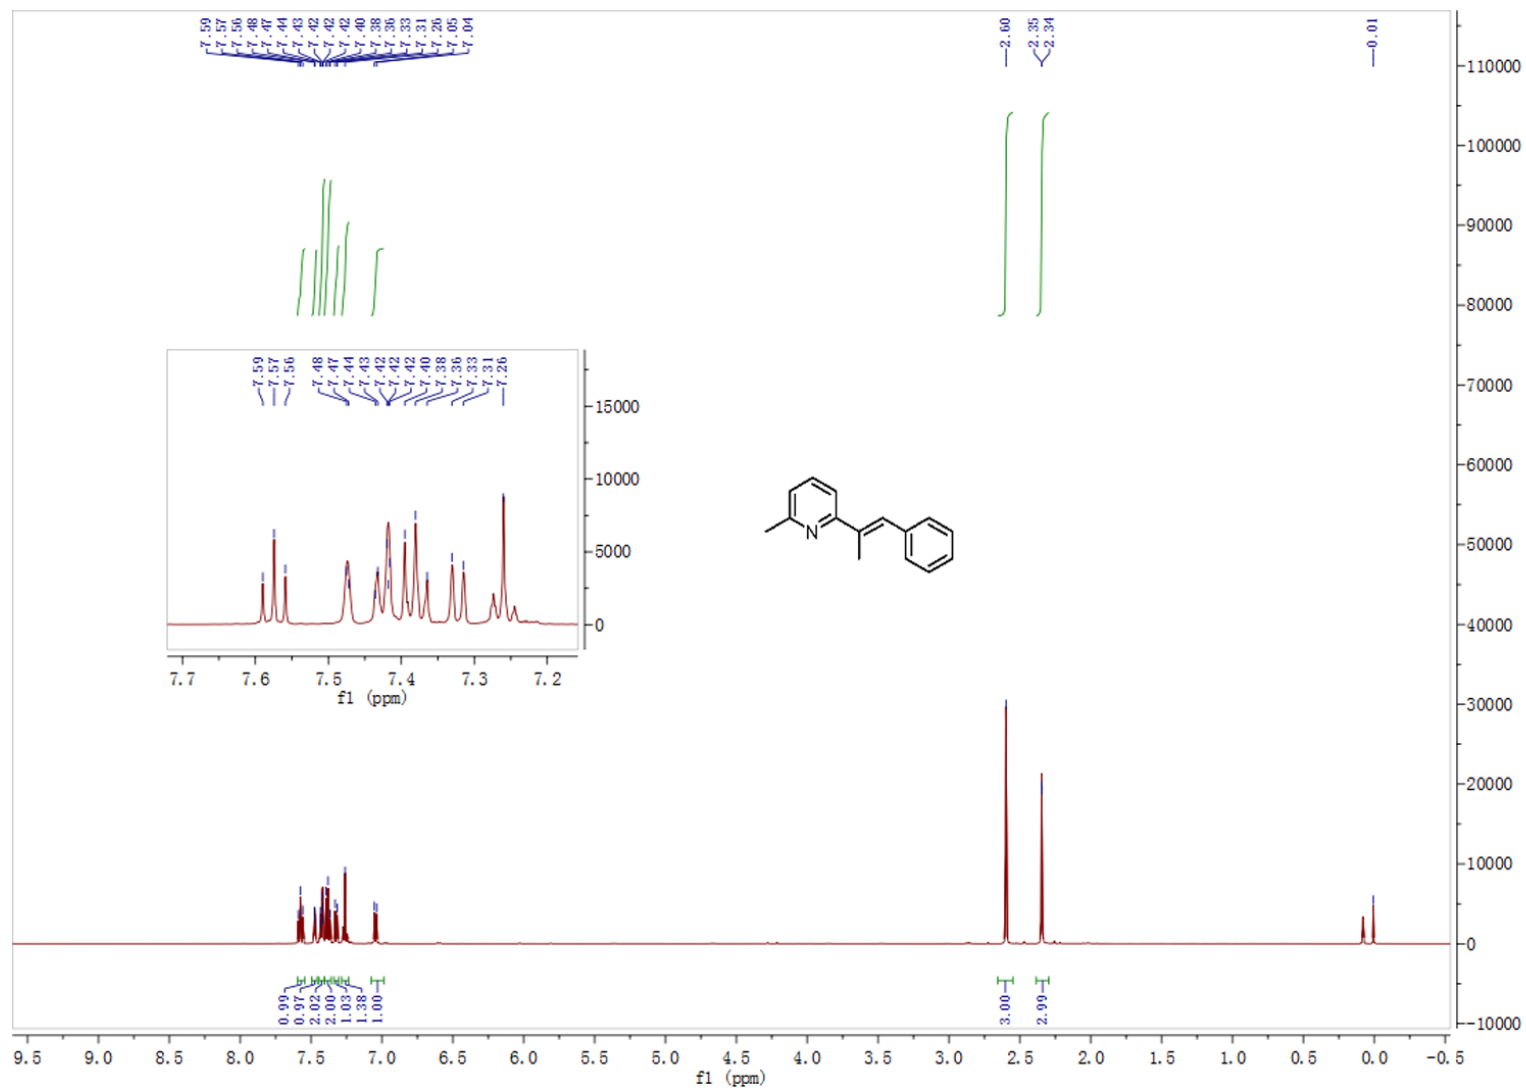



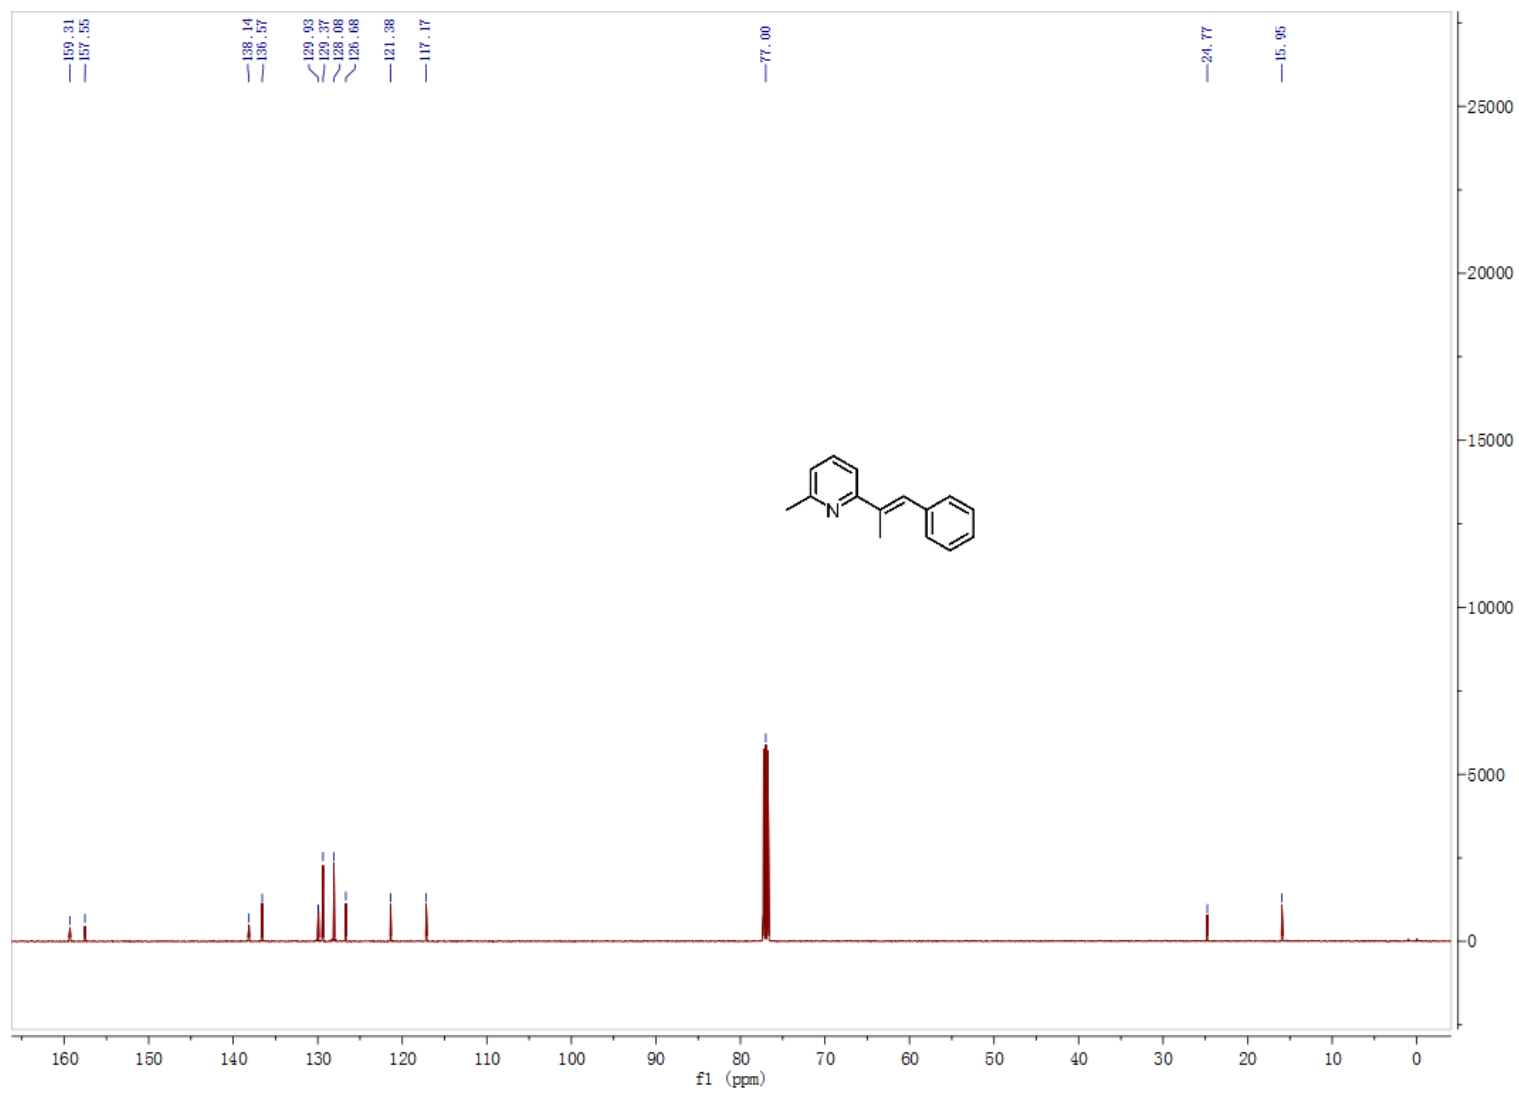

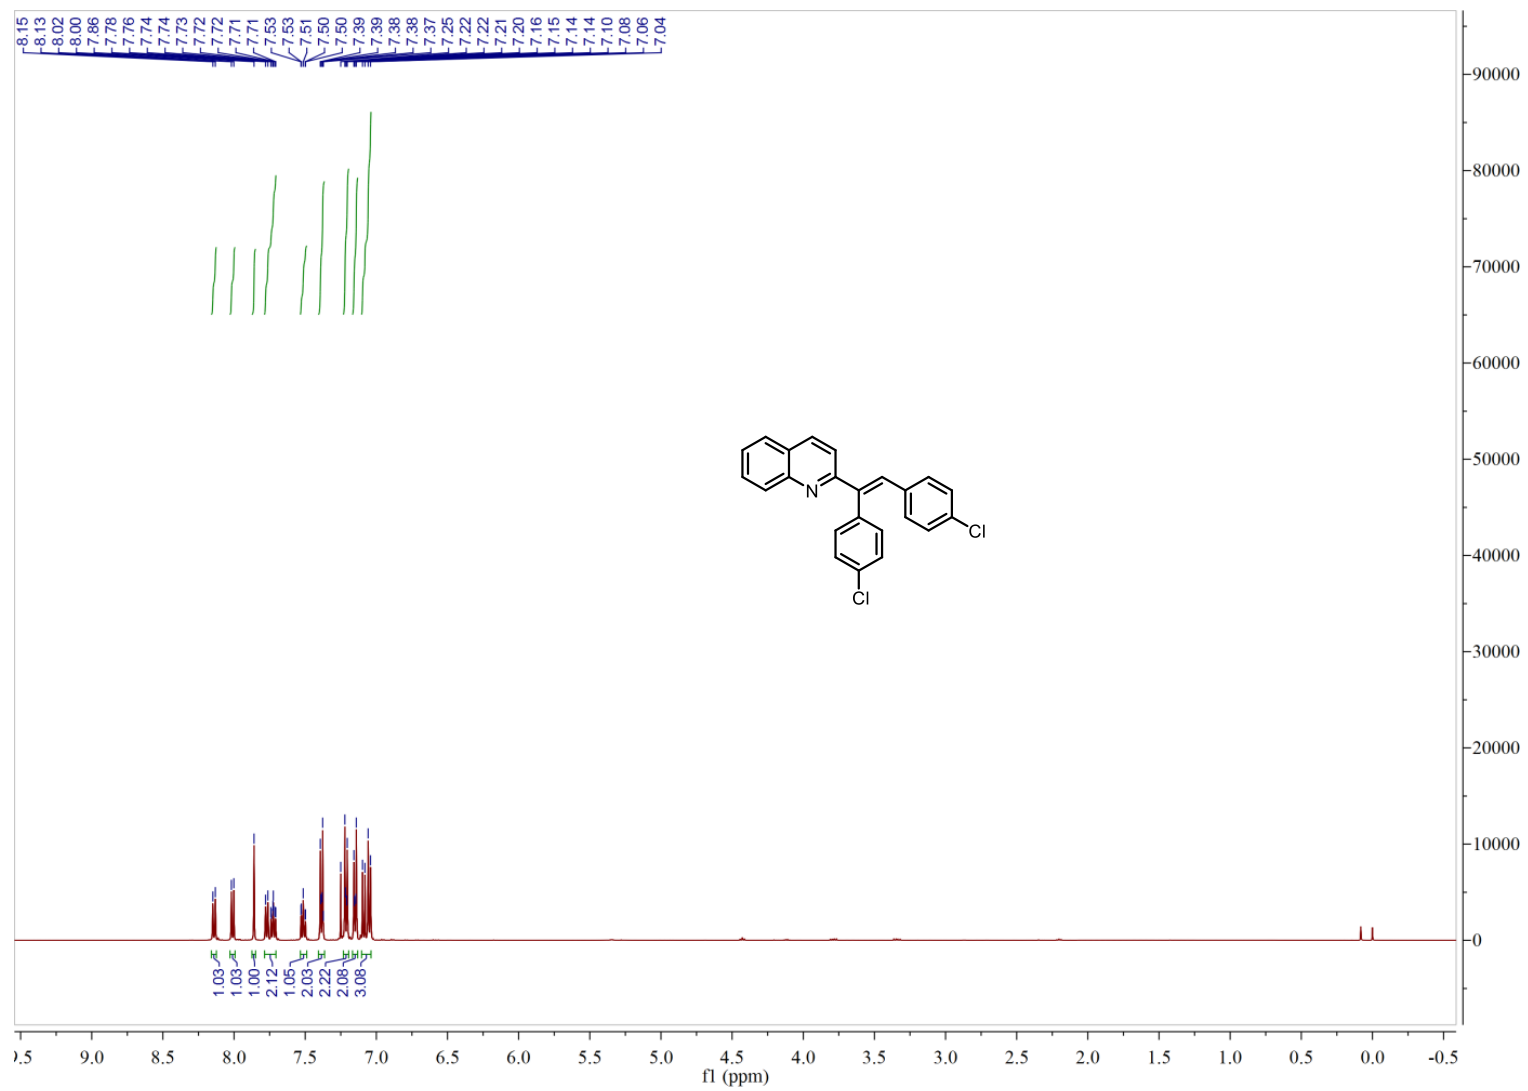

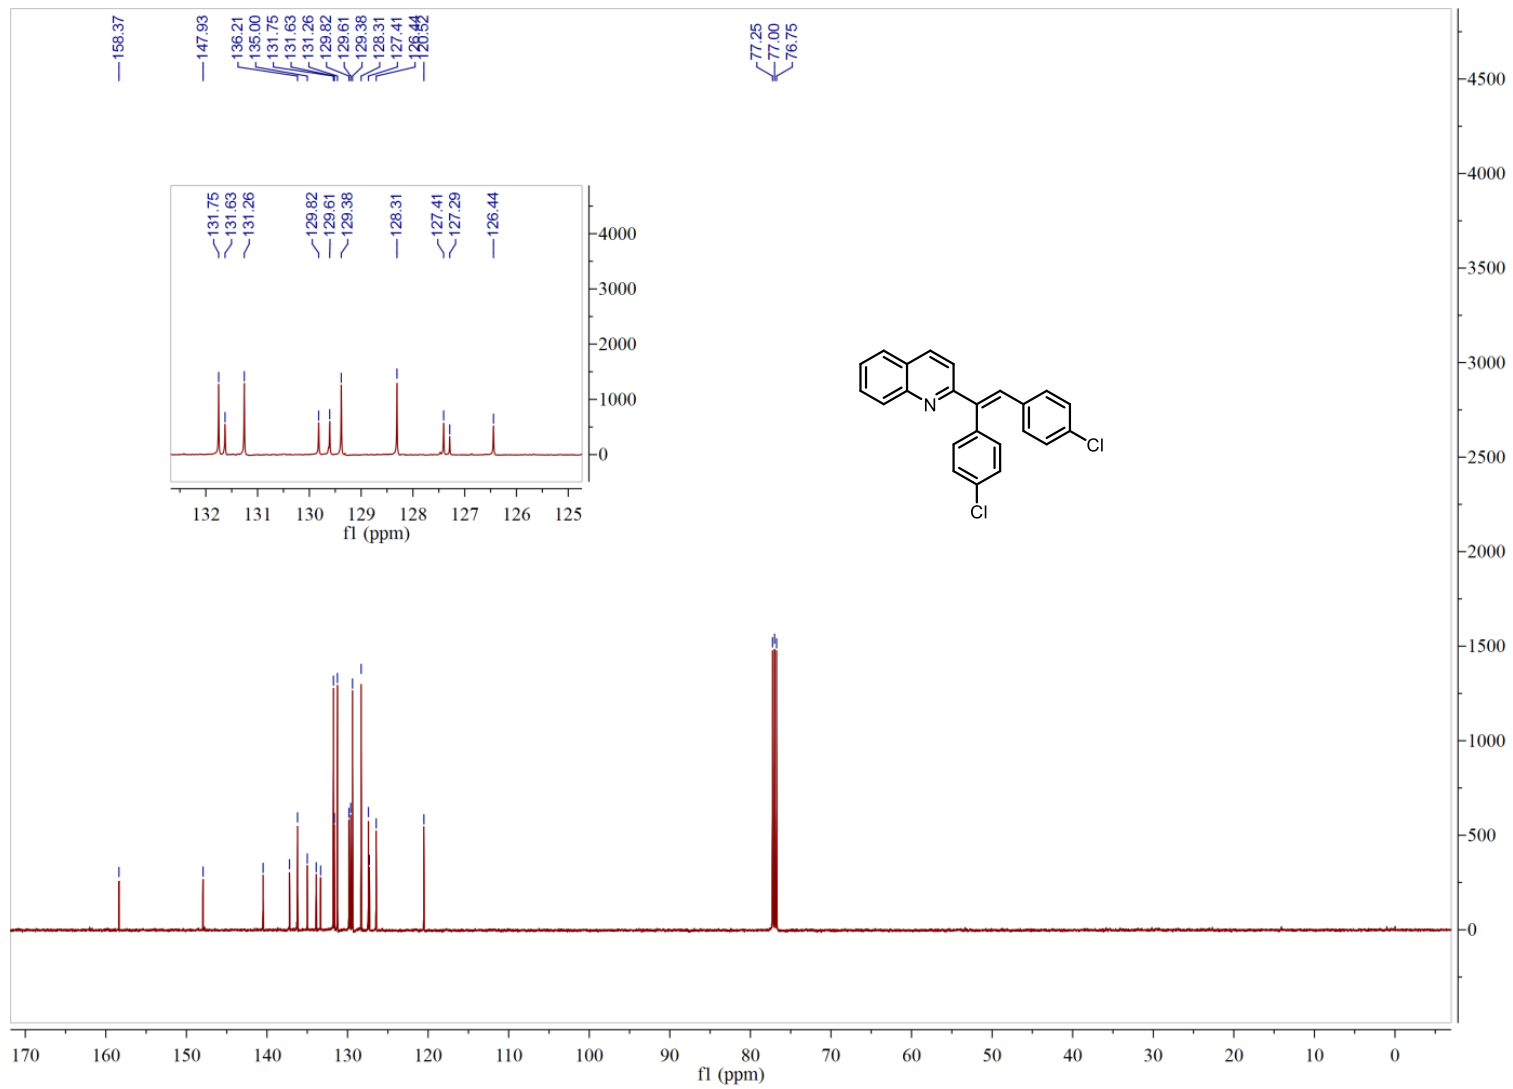

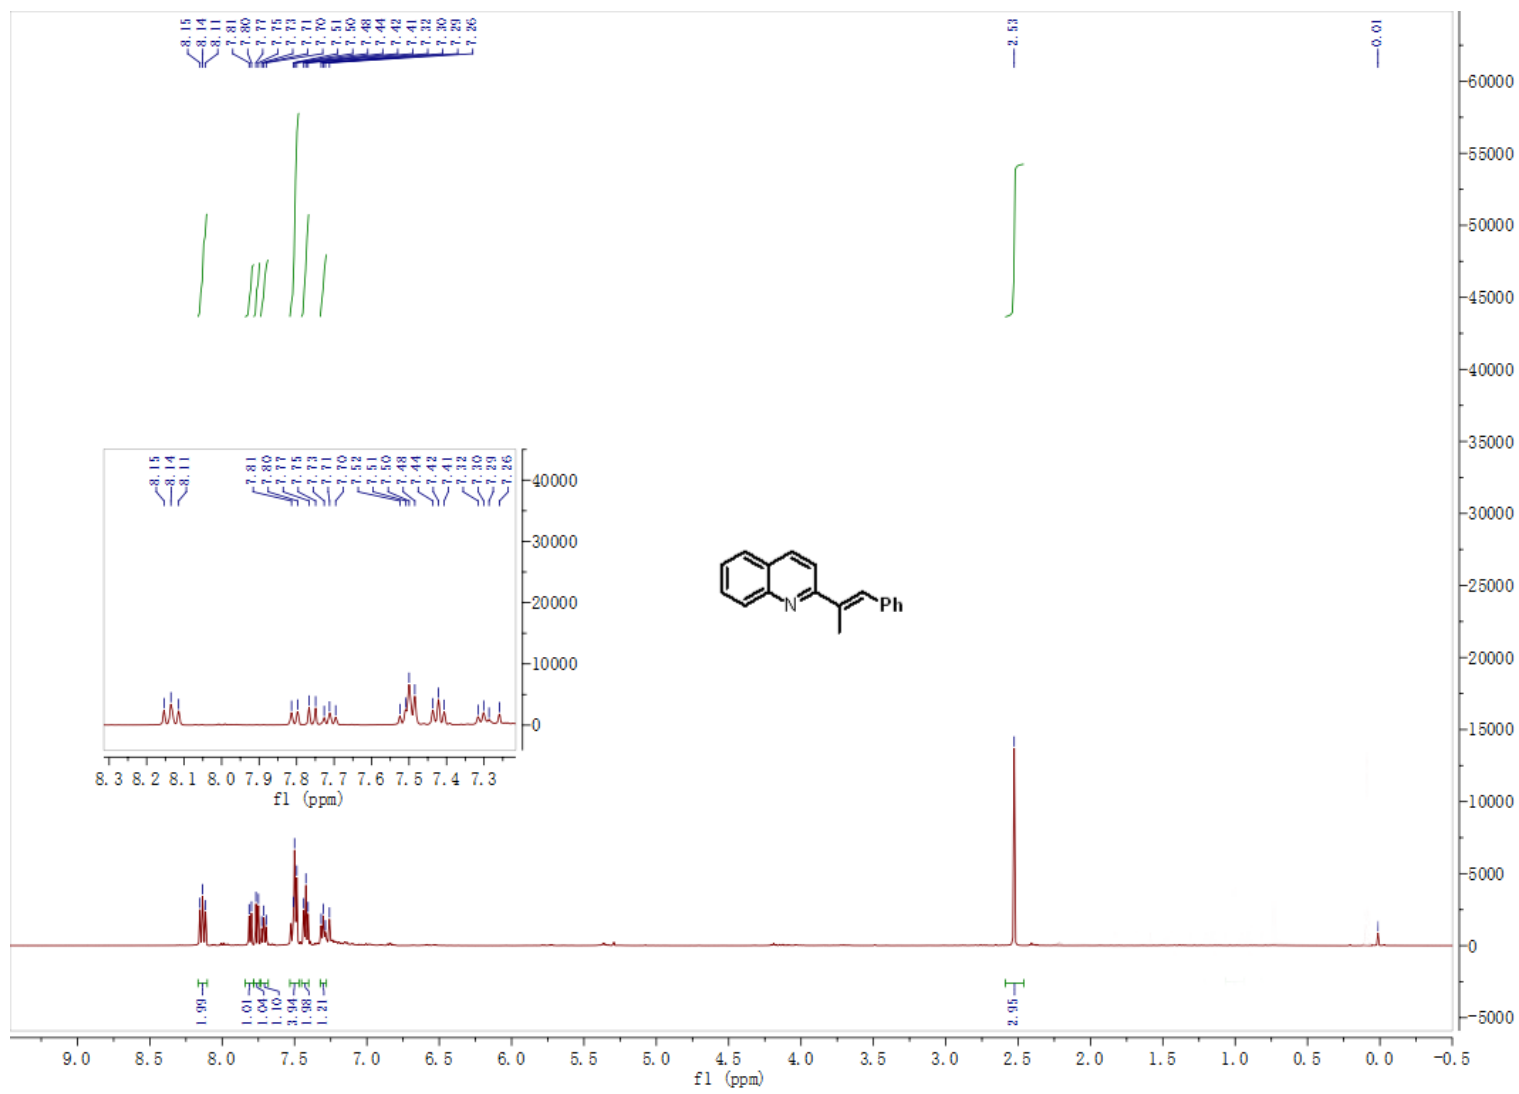

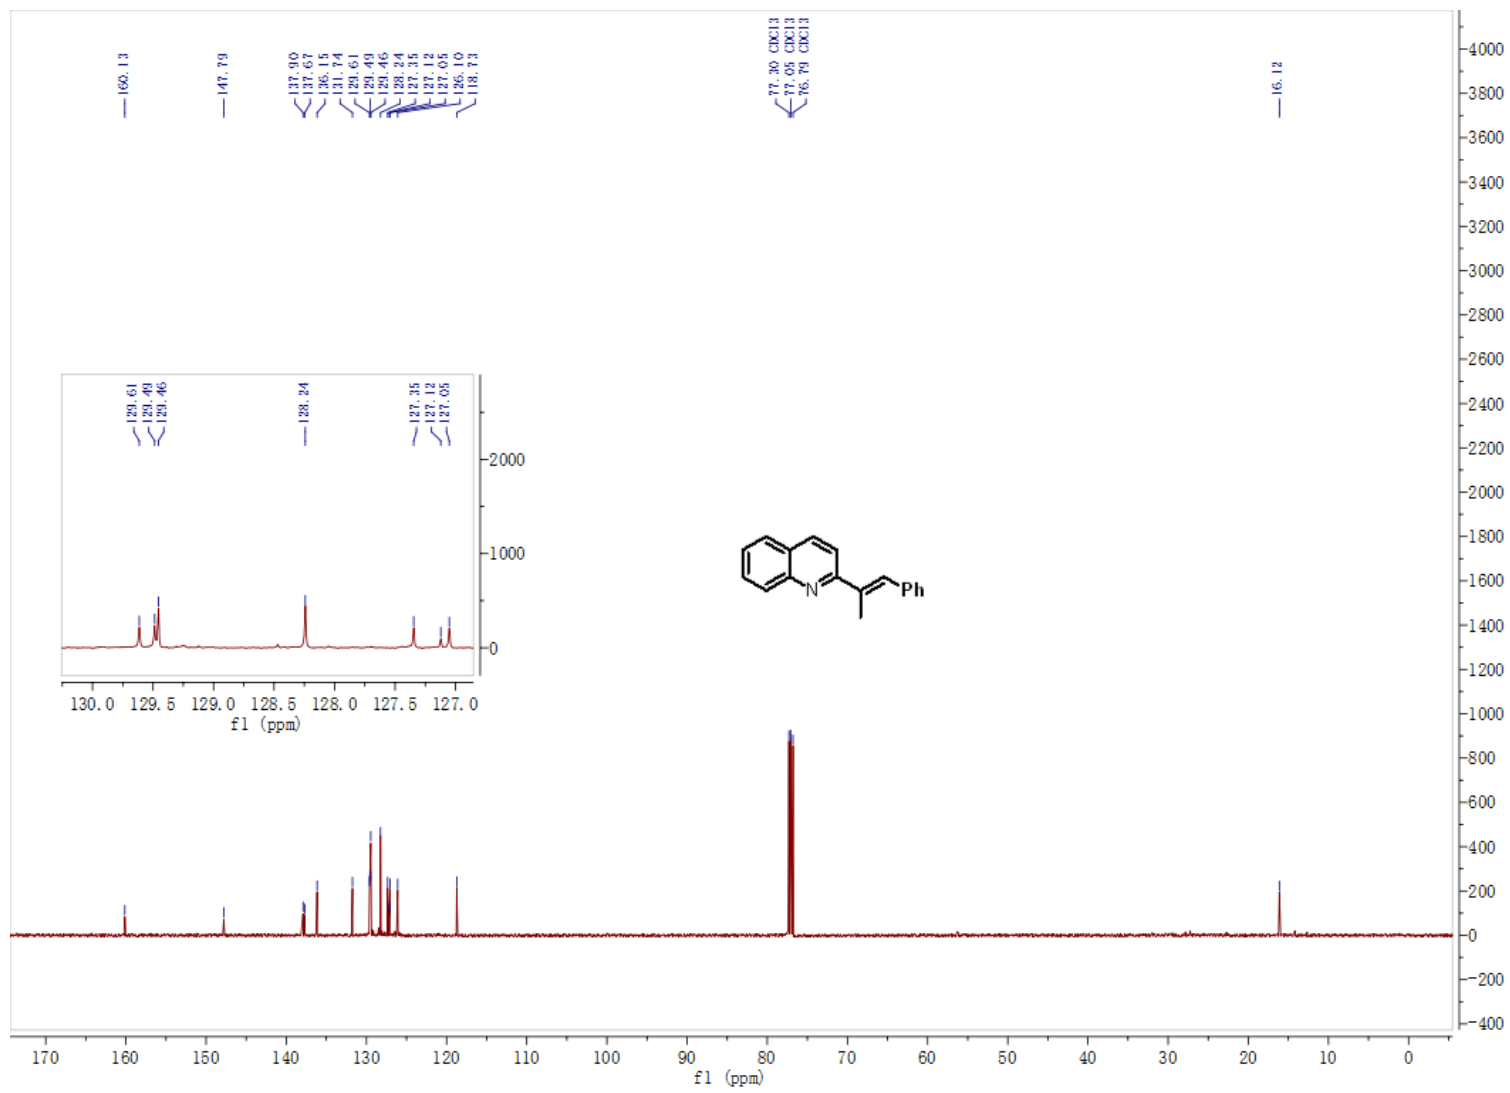

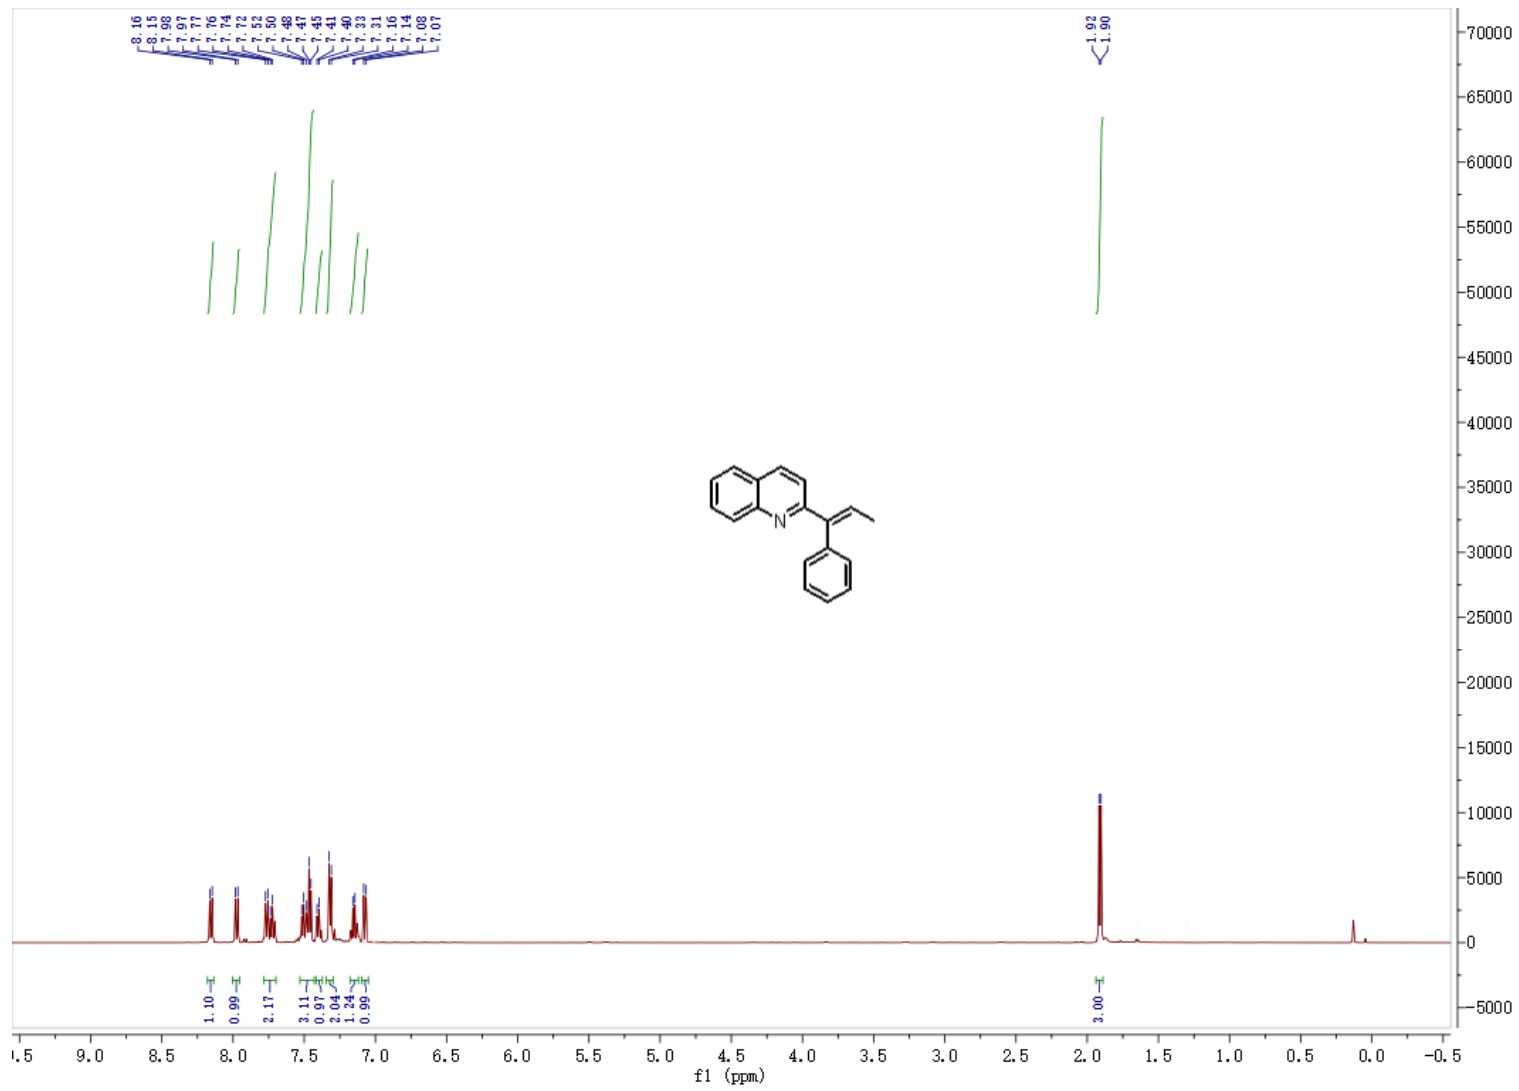

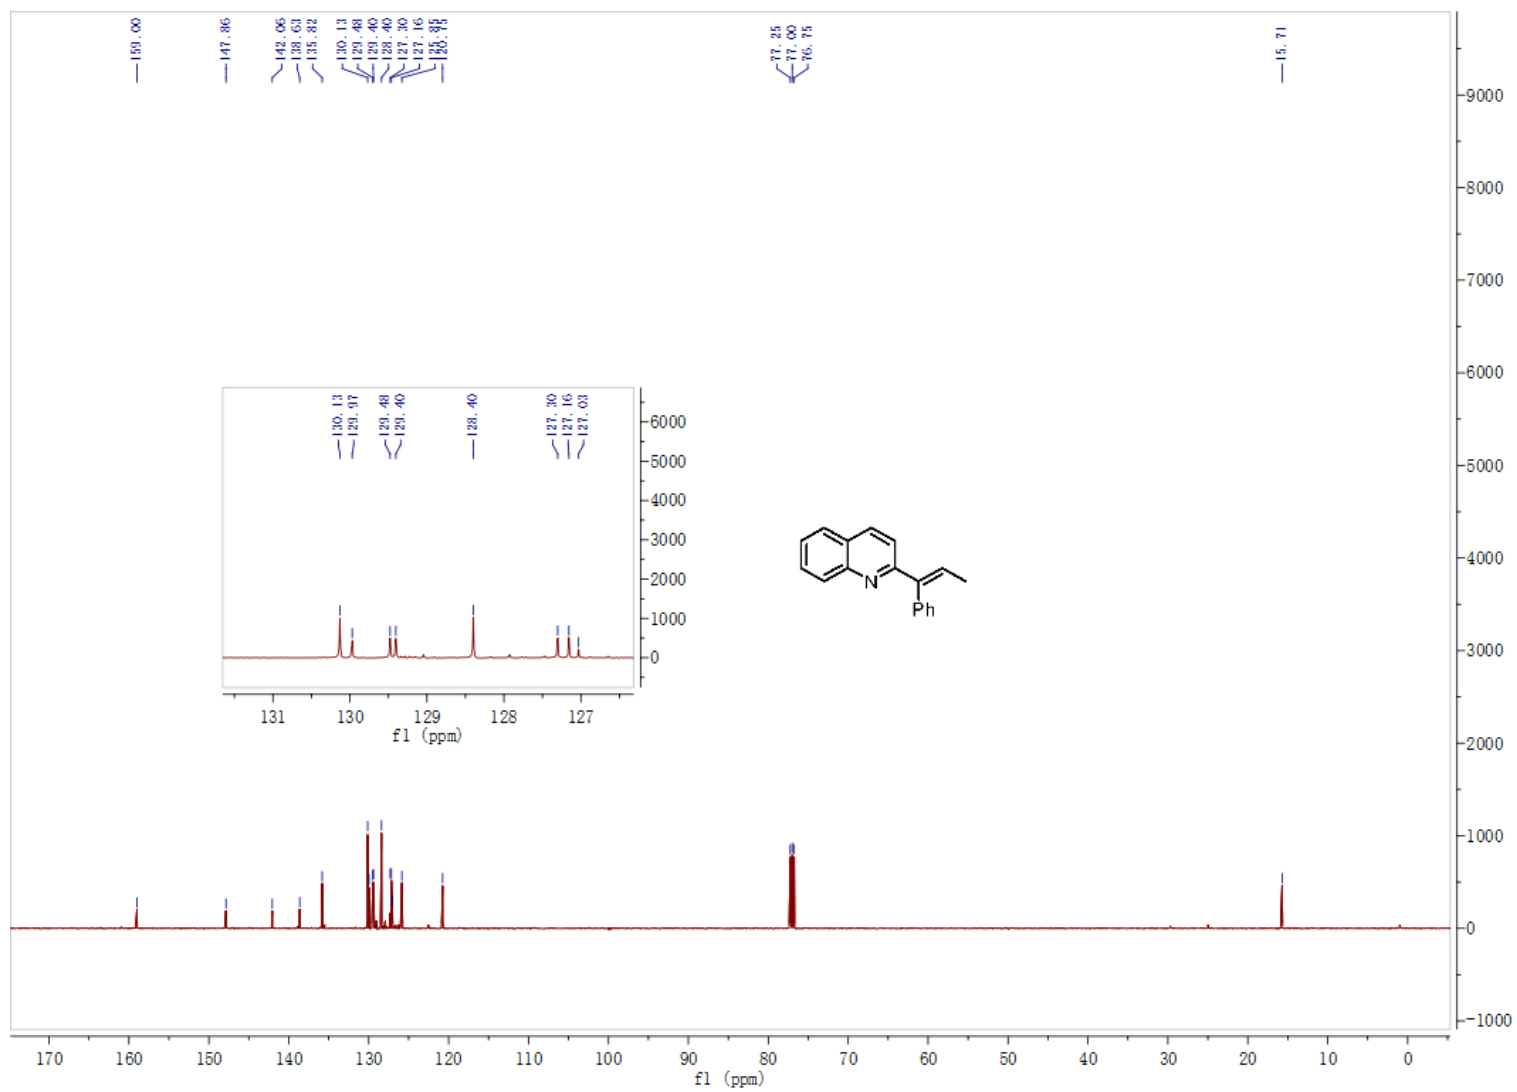

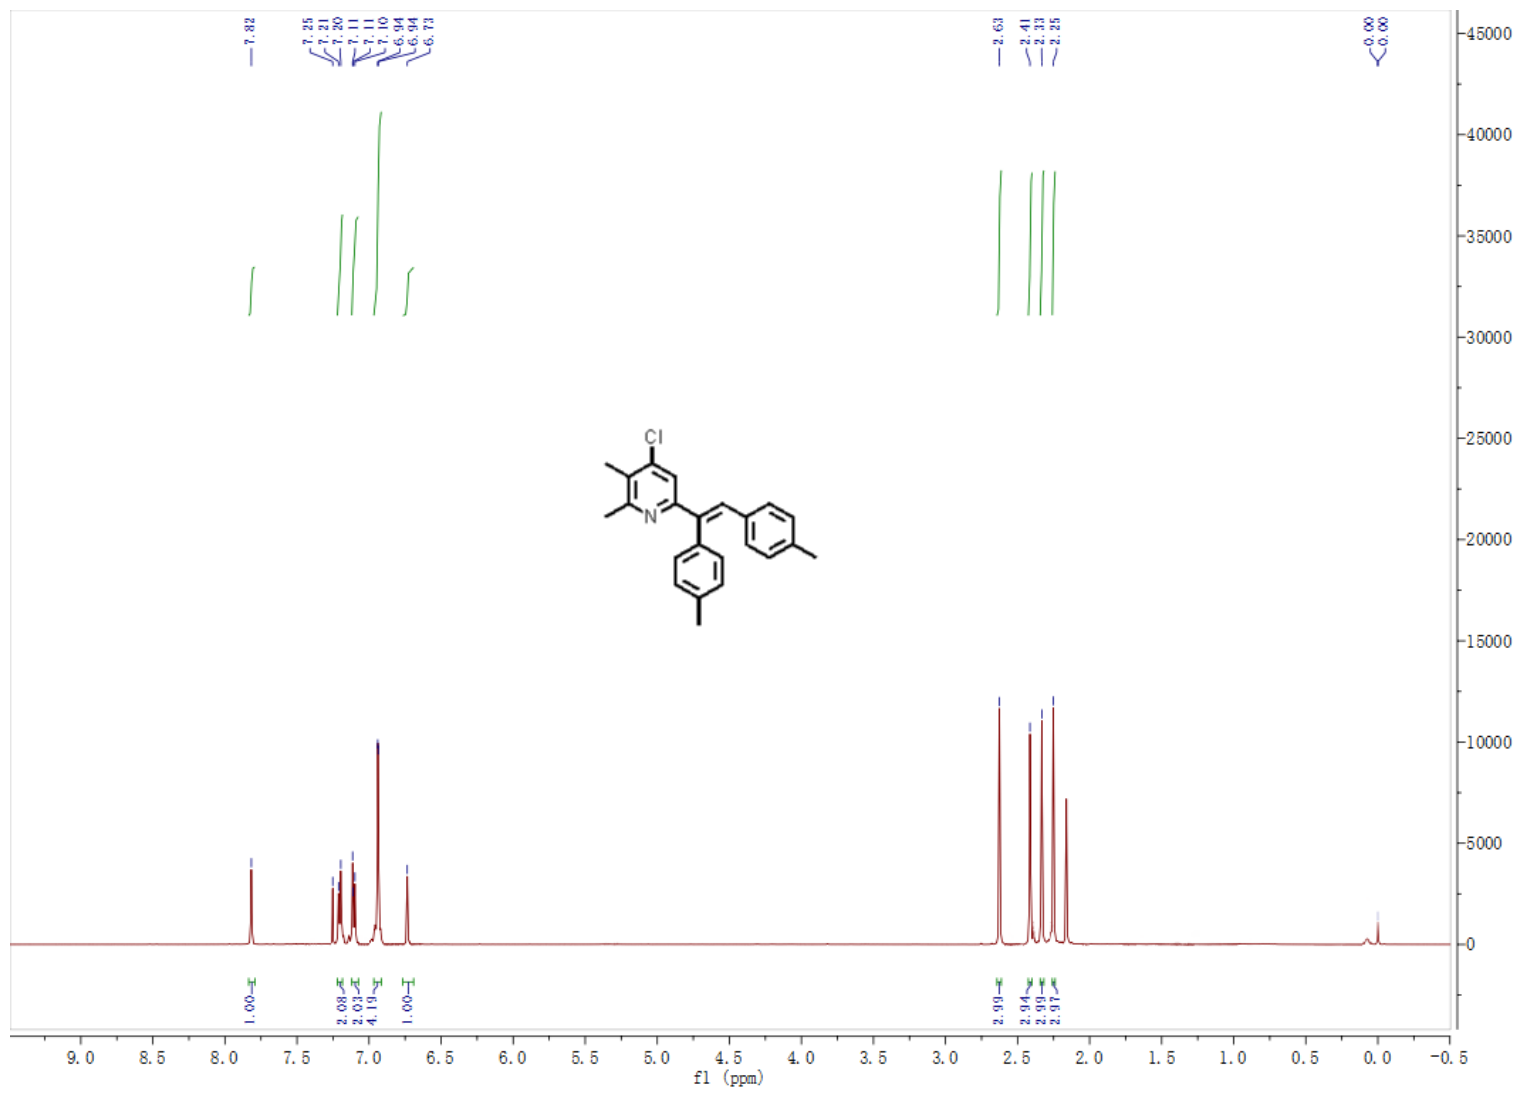



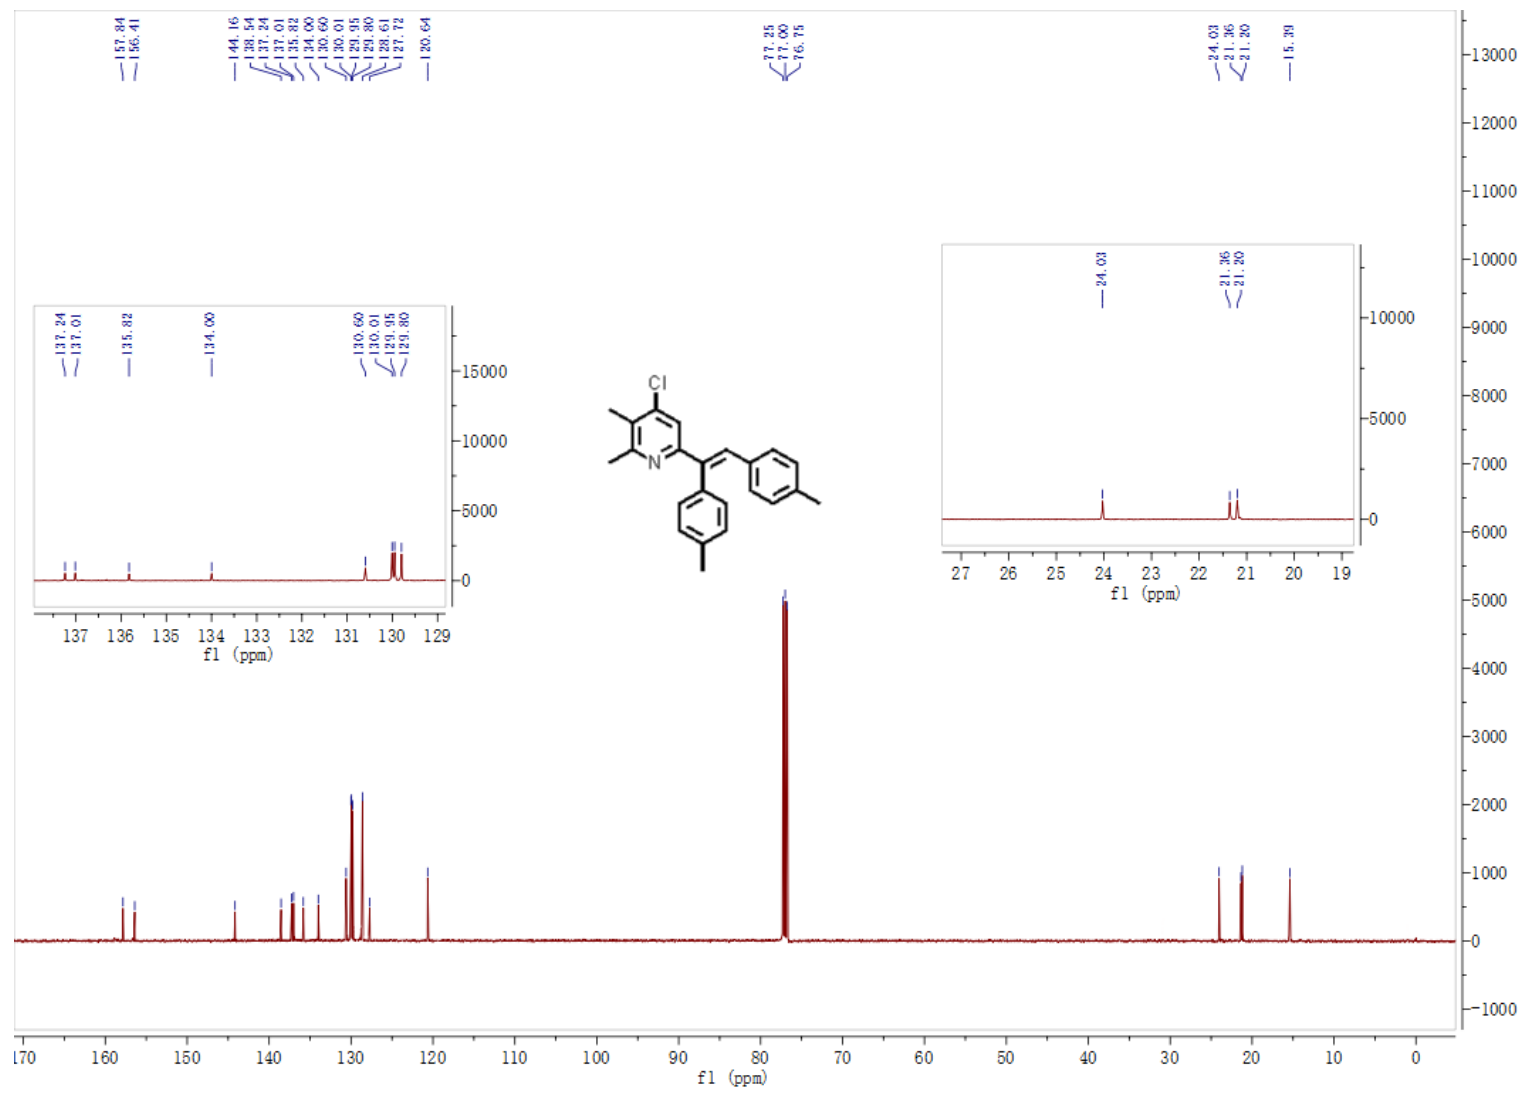

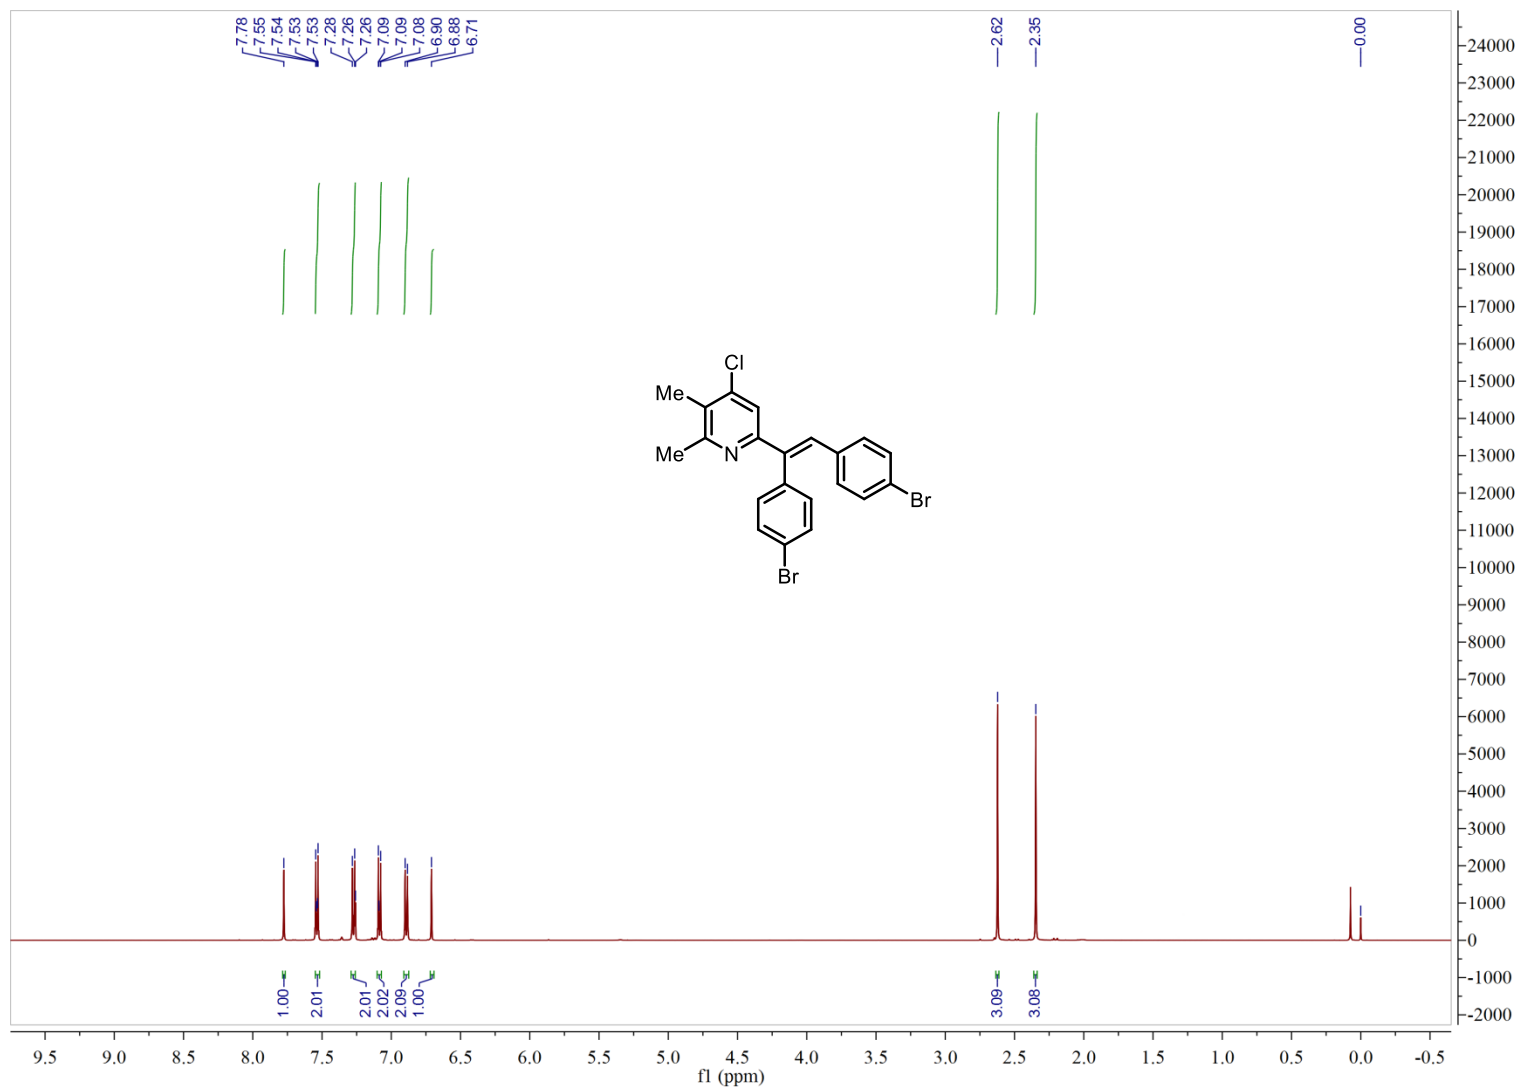

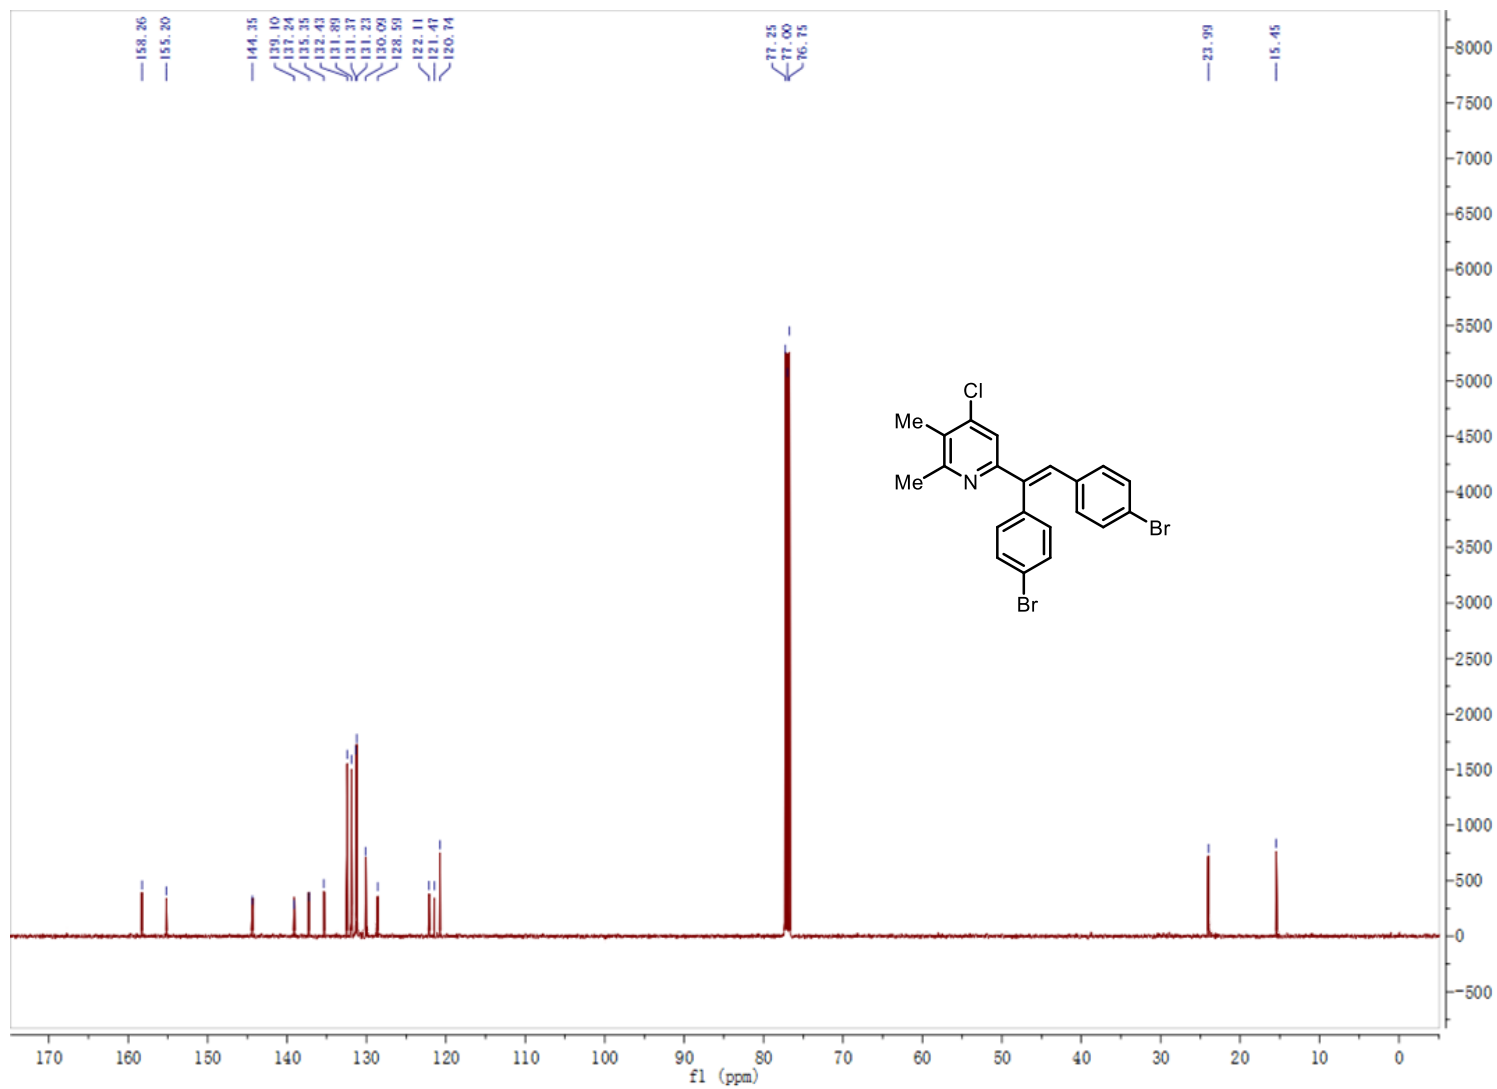

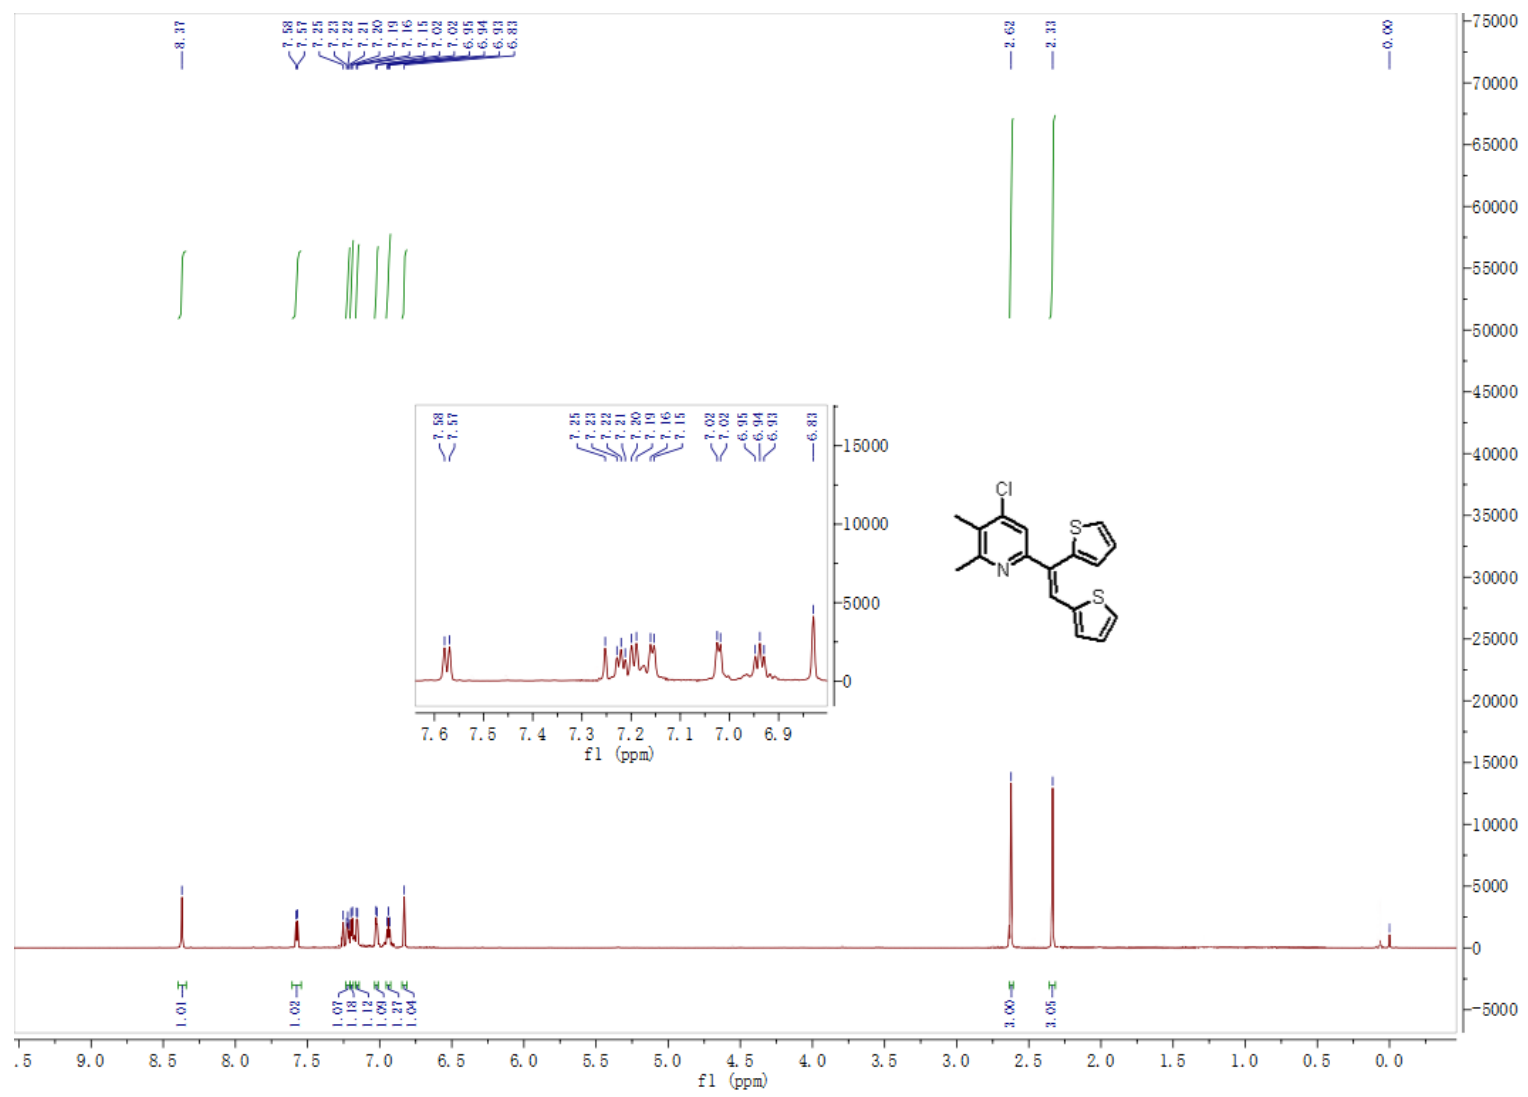

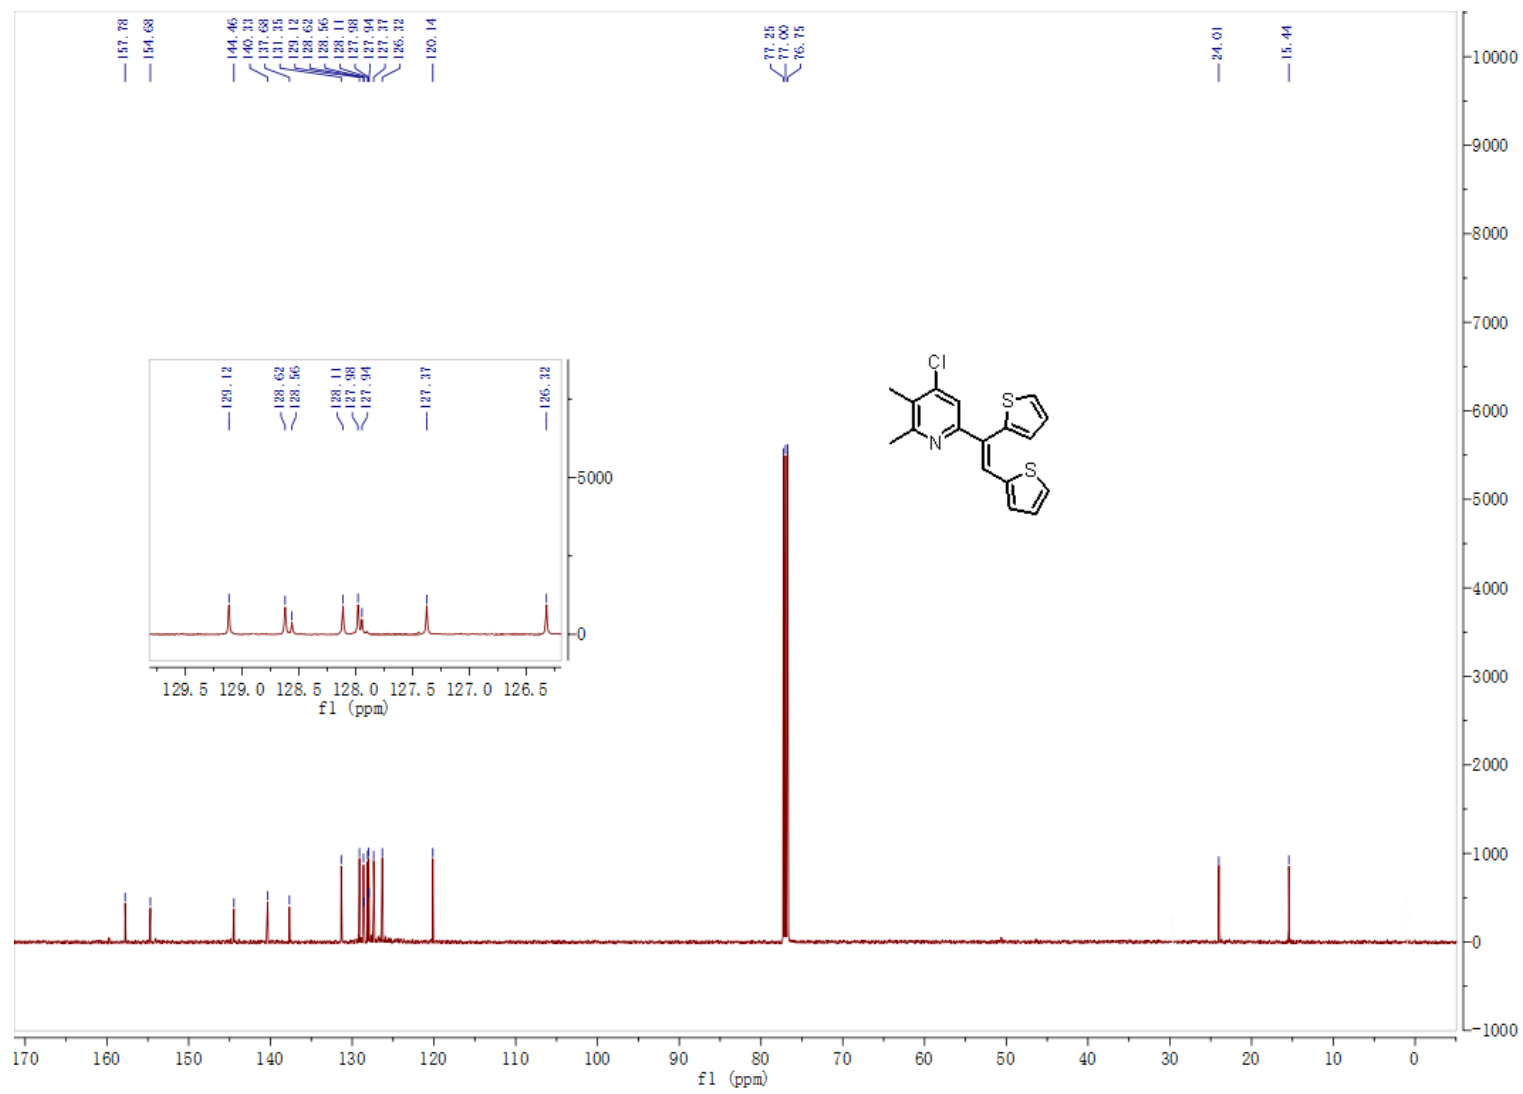

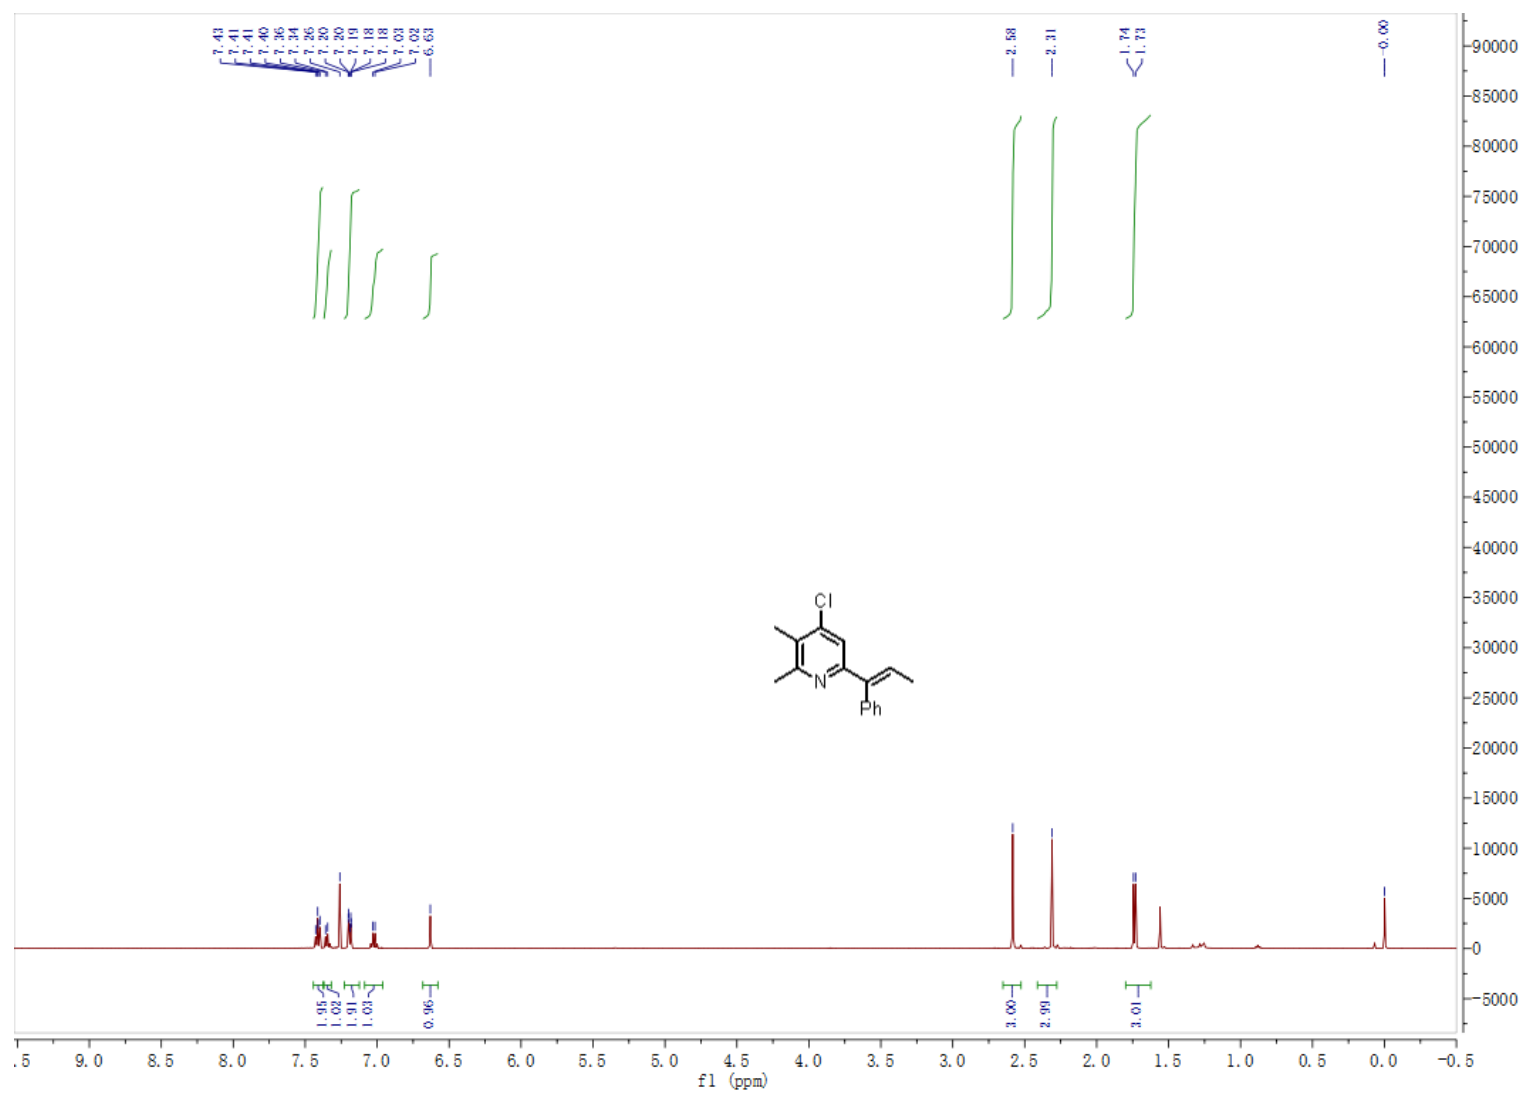

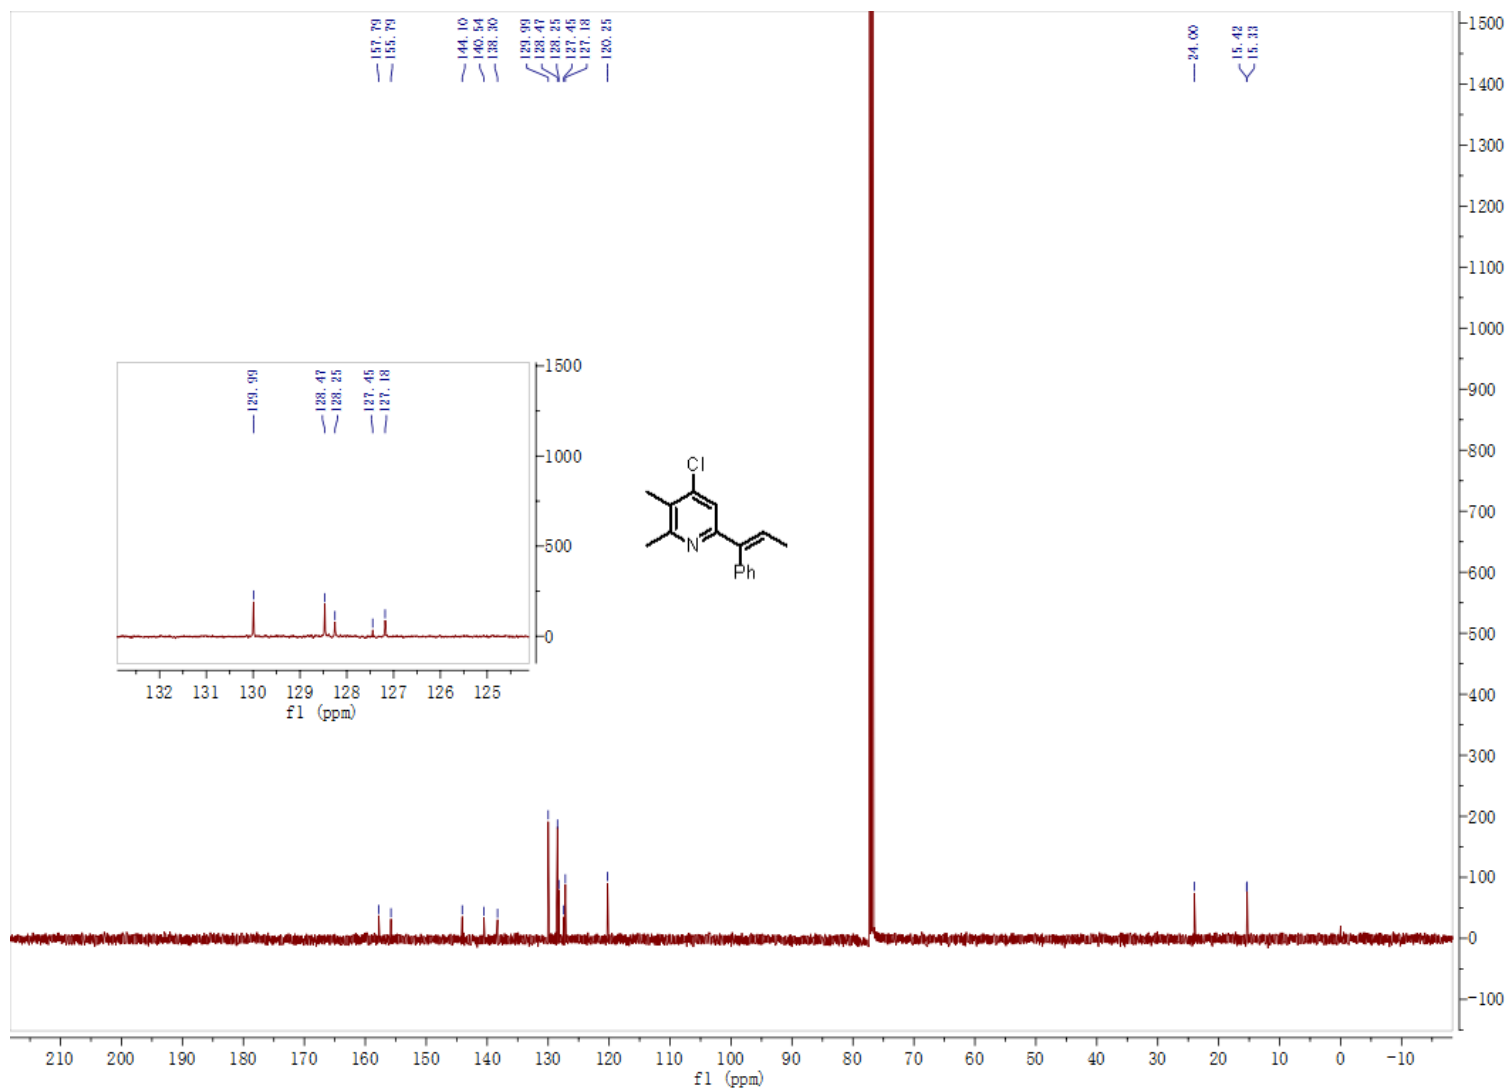

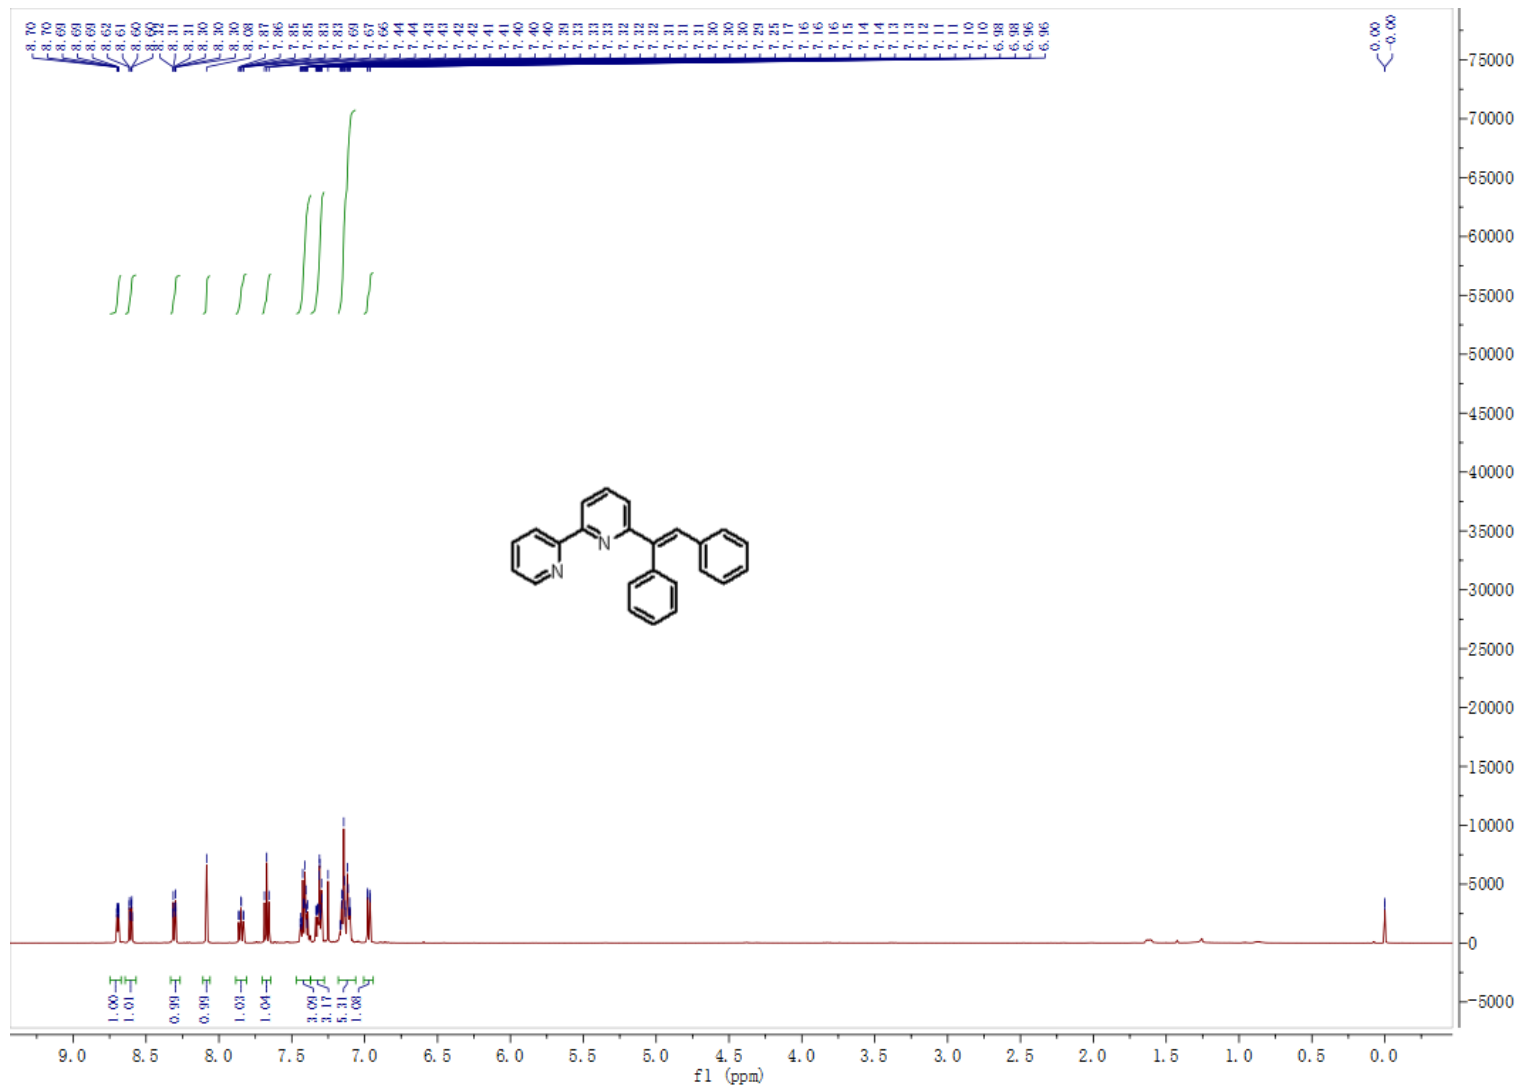



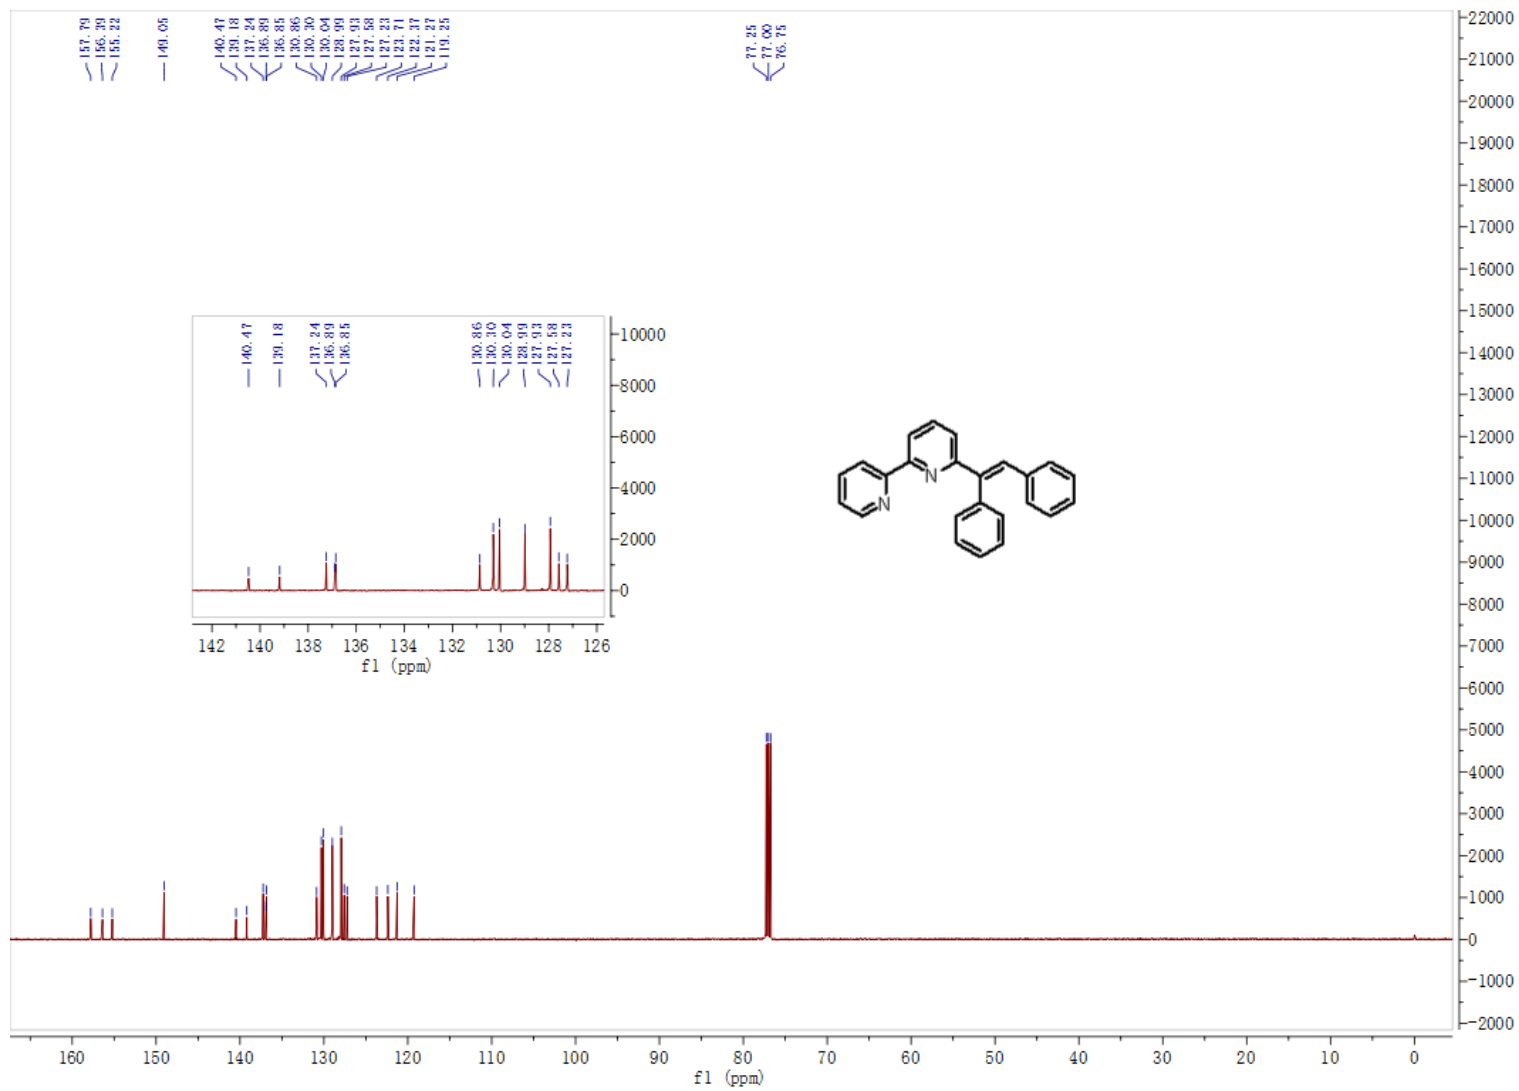

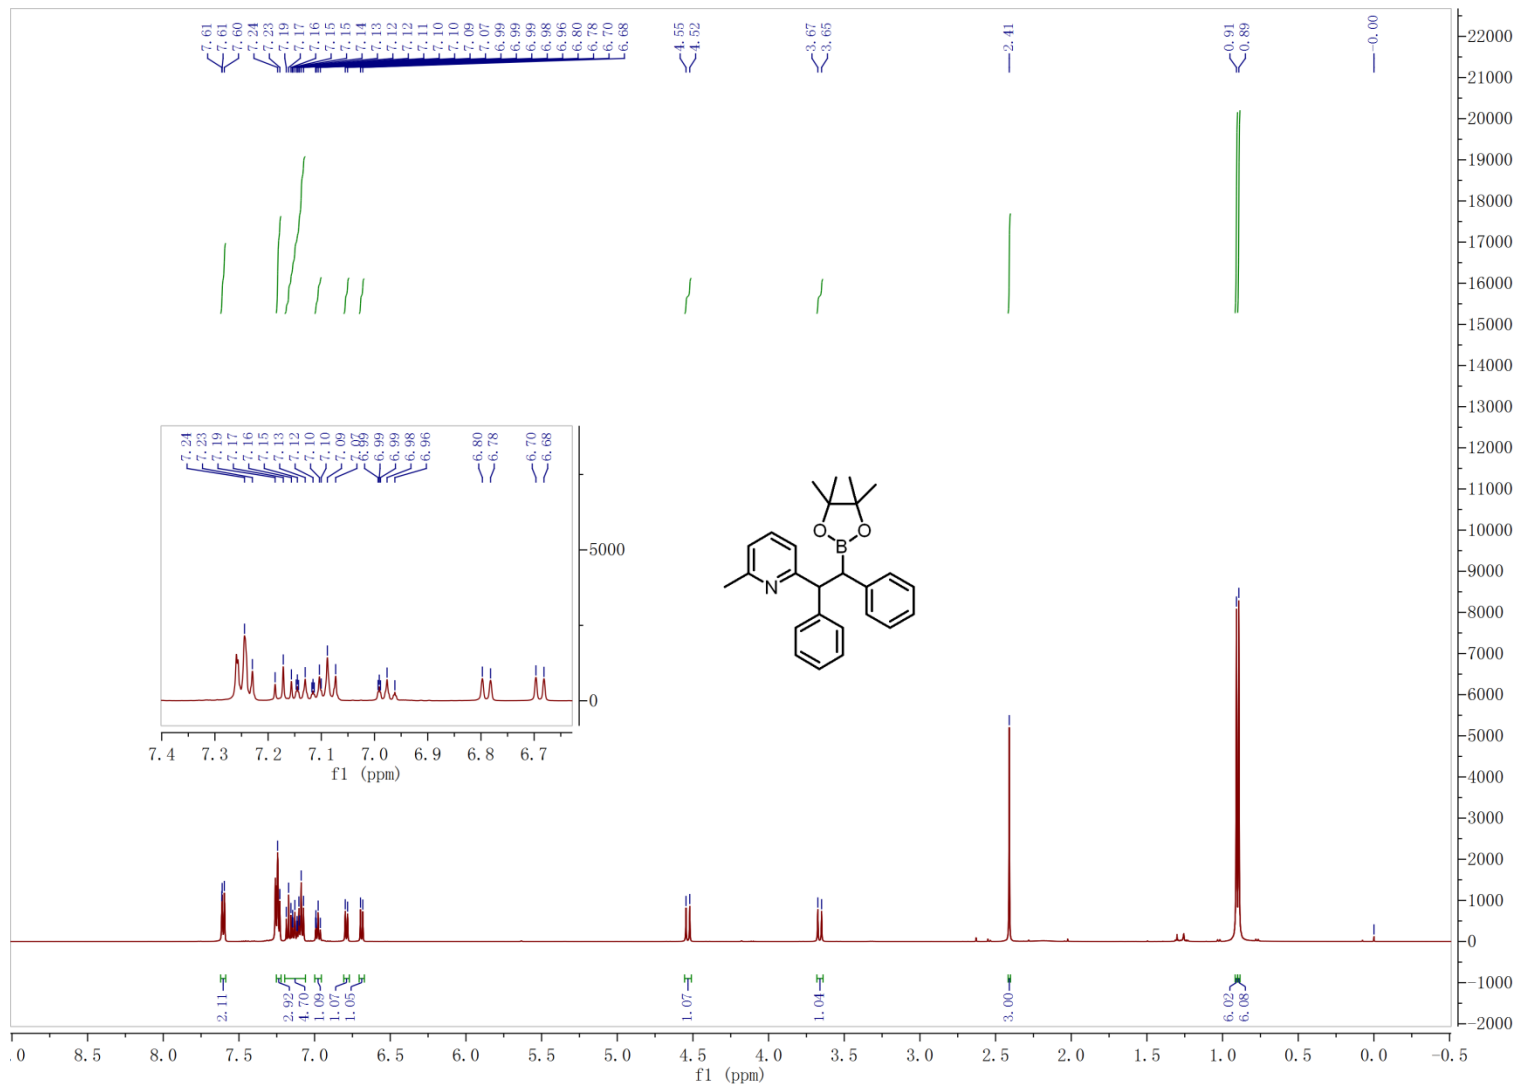

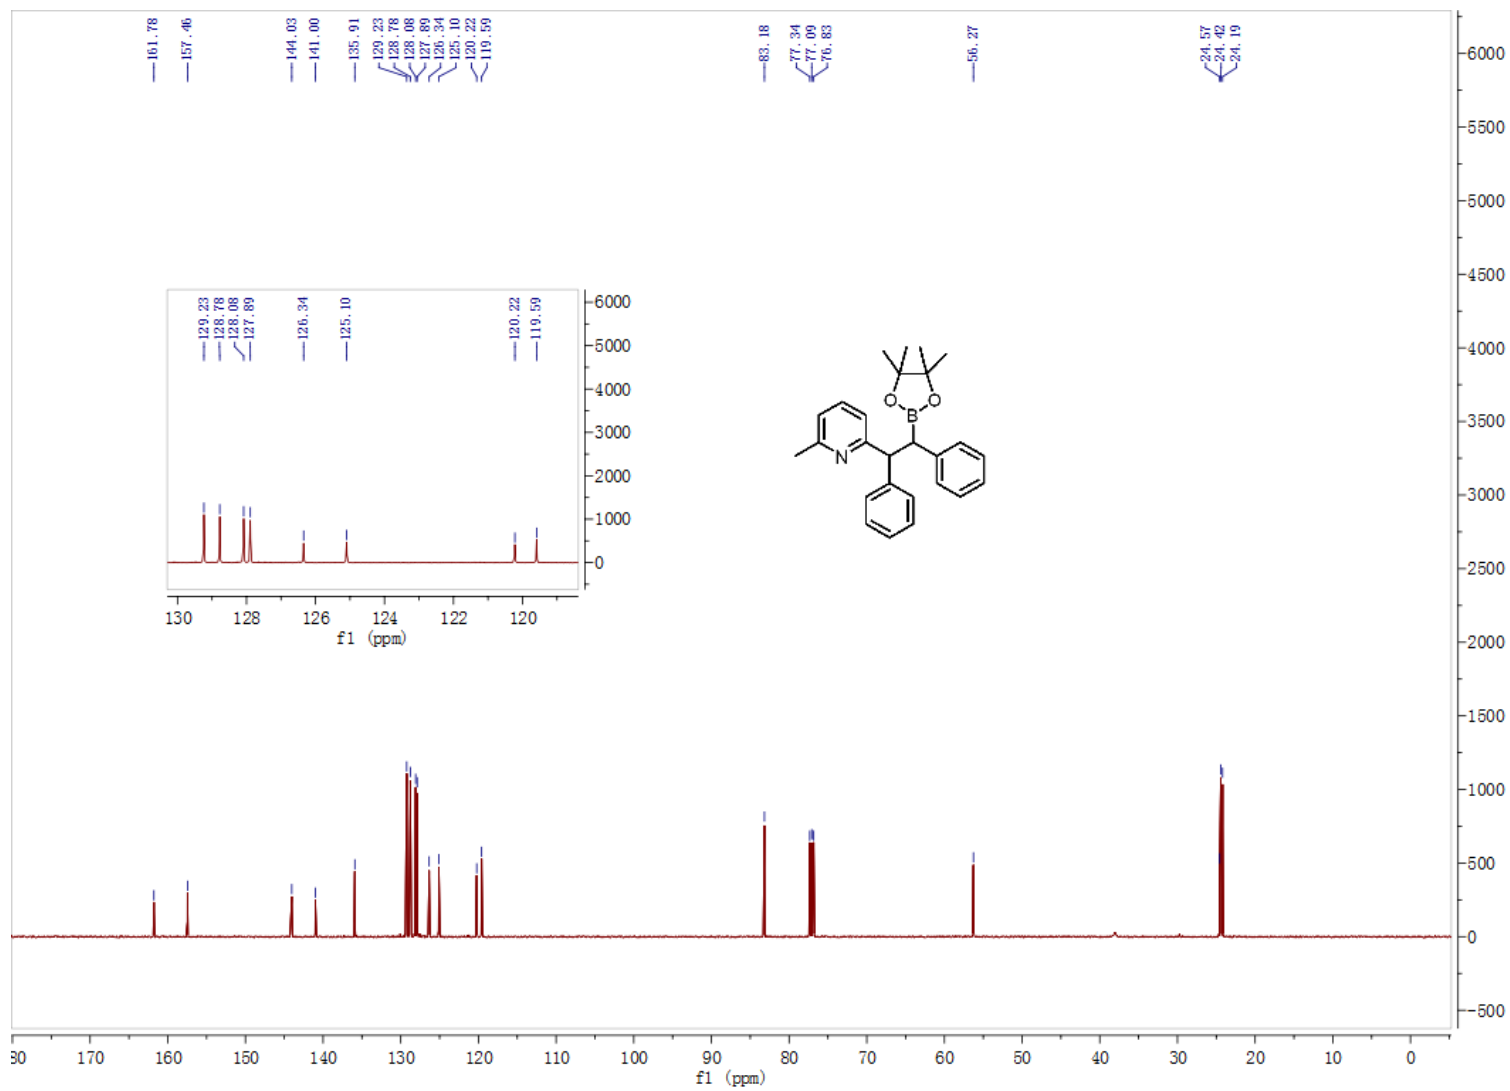

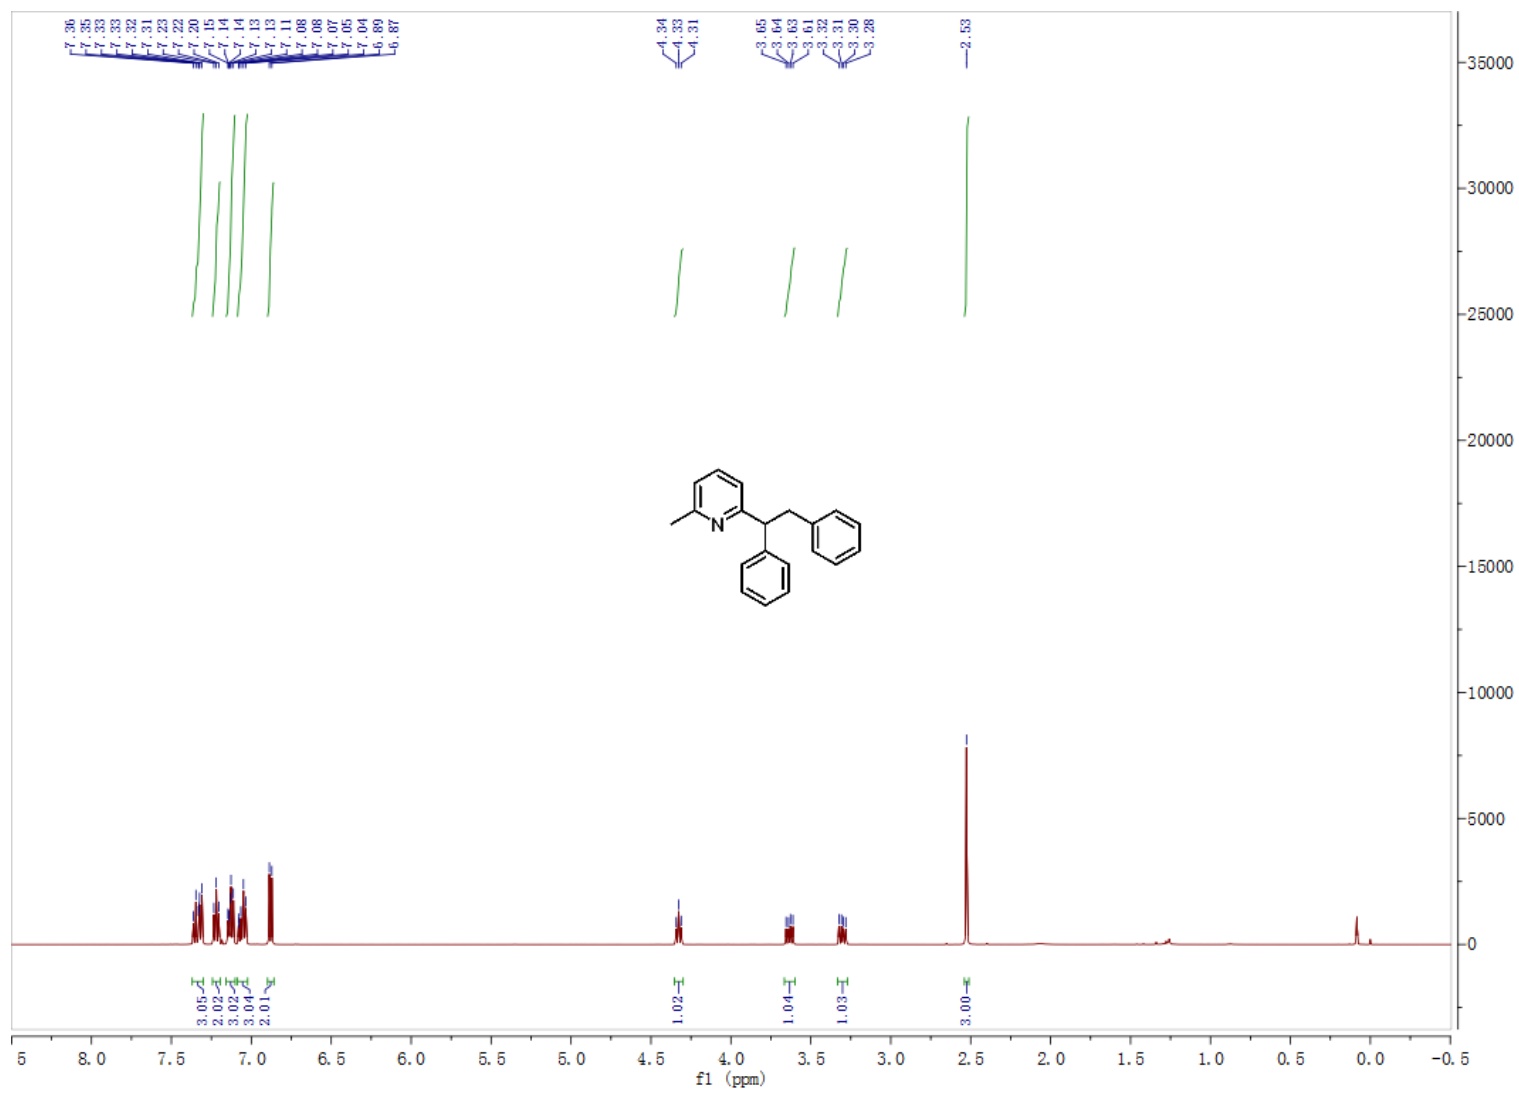

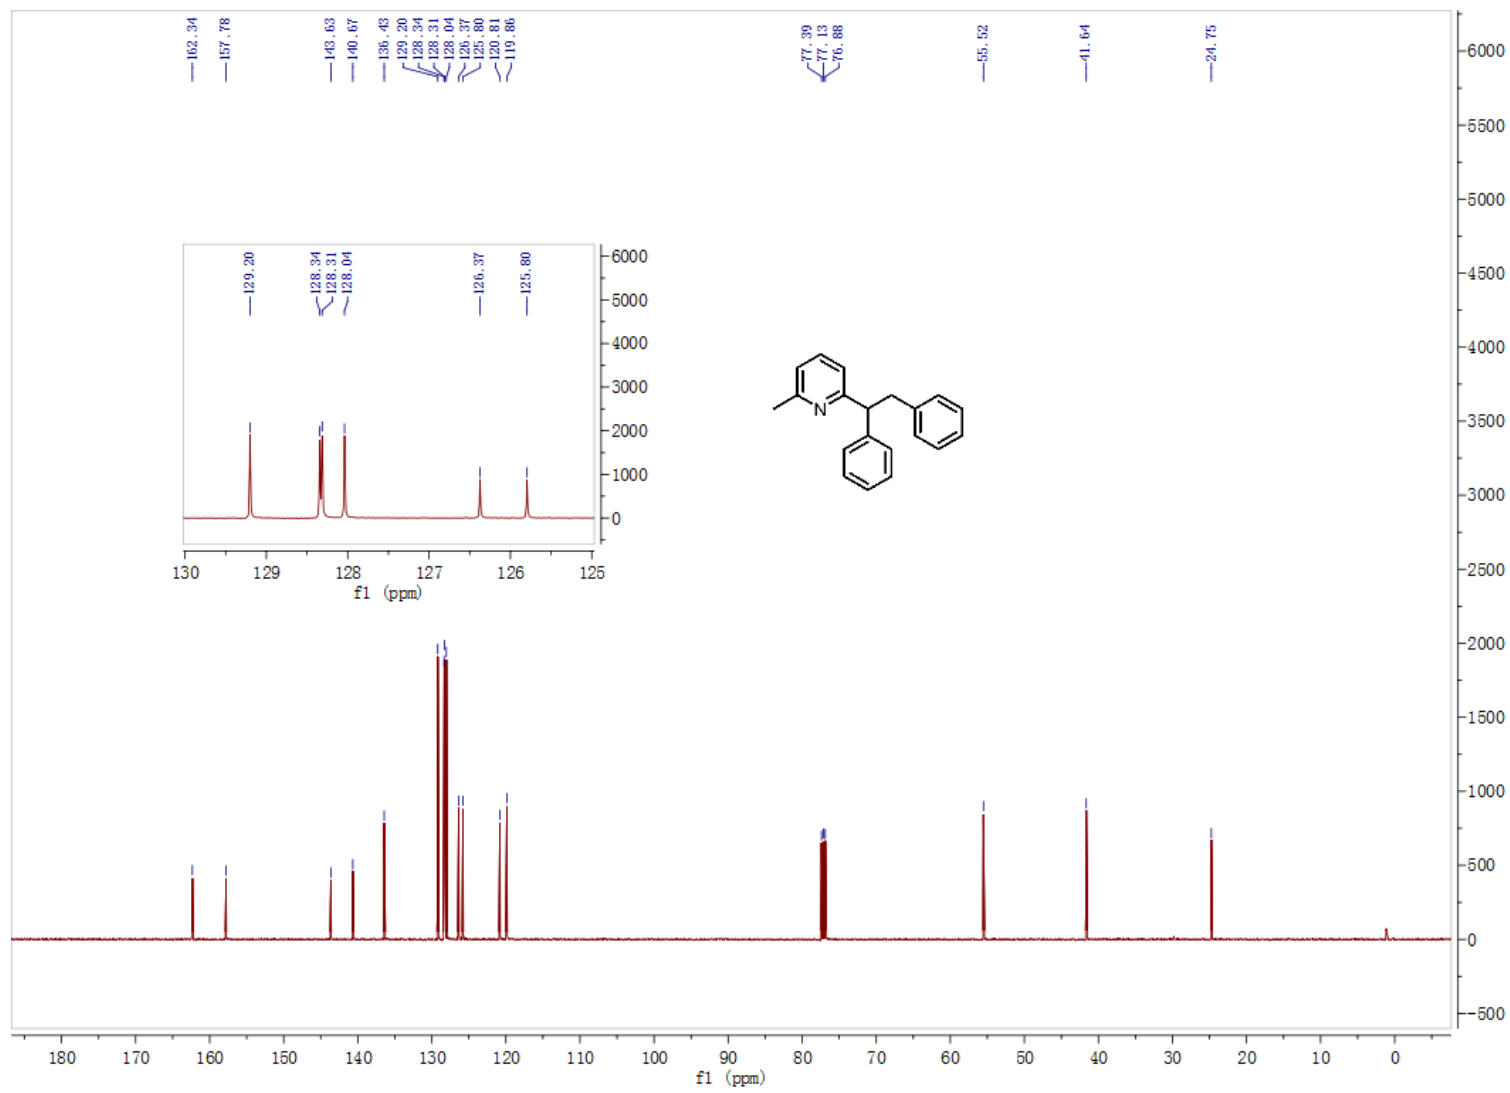

Supplement: d2cc00851c1.pdf [file d2cc00851c1.pdf]
